# Supplementary material for: The discovery of SKLB-0335 as a paralog-selective EZH2 covalent inhibitor
Source: Royal Society of Chemistry journal article supplement (doi:10.1039/d0cc04670a), 2021-01-01

## Electronic Supplementary Information

### **Discovery of SKLB-0335 as a Paralog-Selective EZH2 Covalent Inhibitor**

Qiangsheng Zhang, ‡<sup>a</sup> Xi Hu, ‡<sup>a</sup> Lu Li, ‡<sup>b</sup> Lidan Zhang, <sup>a</sup> Guoquan Wan, <sup>a</sup> Qiang Feng, <sup>c</sup> Yongxia Zhu, <sup>d</sup> Ningyu Wang, <sup>\*e</sup> Zhihao Liu <sup>\*a</sup> and Luoting Yu<sup>\*a</sup>

a. State Key Laboratory of Biotherapy/Collaborative Innovation Center for Biotherapy, West China Hospital, West China Medical School, Sichuan University, Chengdu, Sichuan 610041, P. R. China.

b. Institute of Clinical Trials, West China Hospital, Sichuan University, Chengdu, Sichuan, 610041, P.R. China

c. College of Chemistry and Life Science, Chengdu Normal University, Chengdu 611130, P. R. China.

d. Department of Clinical Pharmacy, Sichuan Cancer Hospital & Institute, Sichuan Cancer Center, School of Medicine, University of Electronic Science and Technology of China, Chengdu, 610041, P. R. China.

e. School of Life Science and Engineering, Southwest JiaoTong University, Chengdu, Sichuan, 611756, P. R. China.

‡These authors contributed equally to this work.

## Table of Contents

|                                                                                                                                  |     |
|----------------------------------------------------------------------------------------------------------------------------------|-----|
| <b>Fig. S1</b> There is no Cys663 in EZH2 mutation reported.....                                                                 | S3  |
| <b>Fig. S2</b> Indole derivatives are more suitable for introducing electrophilic warheads.....                                  | S3  |
| <b>Fig. S3</b> Rational design of indole derivatives, pyrazole derivatives and benzene derivatives.....                          | S4  |
| <b>Fig. S4</b> Chemical structures of compounds <b>b1</b> , <b>c2</b> and their reversible analogs <b>b1'</b> , <b>c2'</b> ..... | S4  |
| <b>Fig. S5</b> Inhibition curves of compound <b>c2</b> and its reversible analog <b>c2'</b> on EZH2 <sup>WT</sup> .....          | S4  |
| <b>Tab. S1</b> Inhibitory activity of compounds <b>b3-b15</b> on EZH2 <sup>WT</sup> .....                                        | S5  |
| <b>Fig. S6</b> Potency of SKLB-0335 against mutant EZH2.....                                                                     | S5  |
| <b>Fig. S7</b> The mRNA levels of genes silenced by EZH1 in WSU-DLCL-2 cells after treatment with compounds for 5 days.....      | S5  |
| <b>Scheme S1</b> .....                                                                                                           | S5  |
| <b>Scheme S2</b> .....                                                                                                           | S6  |
| <b>Scheme S3</b> .....                                                                                                           | S6  |
| General chemistry experiment and information.....                                                                                | S7  |
| Chemistry experimental procedures.....                                                                                           | S7  |
| Experimental protocols of biological assays.....                                                                                 | S21 |
| References.....                                                                                                                  | S23 |
| Spectral<br>data.....                                                                                                            | S24 |

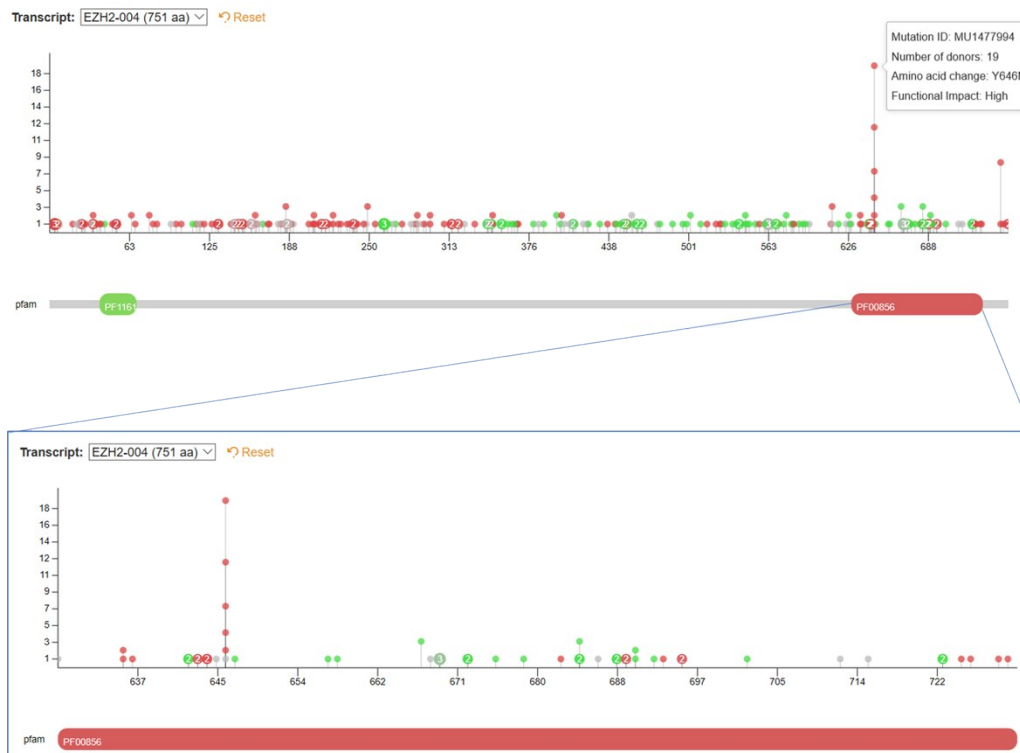

**Fig. S1** There is no Cys663 in EZH2 mutation reported. Date from ICGC (<https://dcc.icgc.org/genes/ENSG00000106462/protein>).

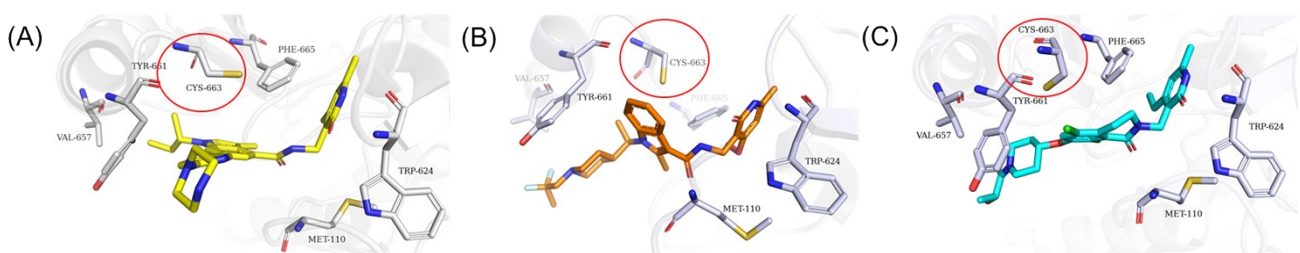

**Fig. S2** Indole derivatives (such as CPI-1205) are more suitable for introducing electrophilic warheads. The co-crystal structure of A) GSK126 (yellow spheres, PDB code: 5WG6), B) CPI-1205 analog (orange spheres, PDB code: 5LS6) and C) PF-06821497 analog (blue spheres, PDB code: 5IJ7) bound to the PRC2 complex.

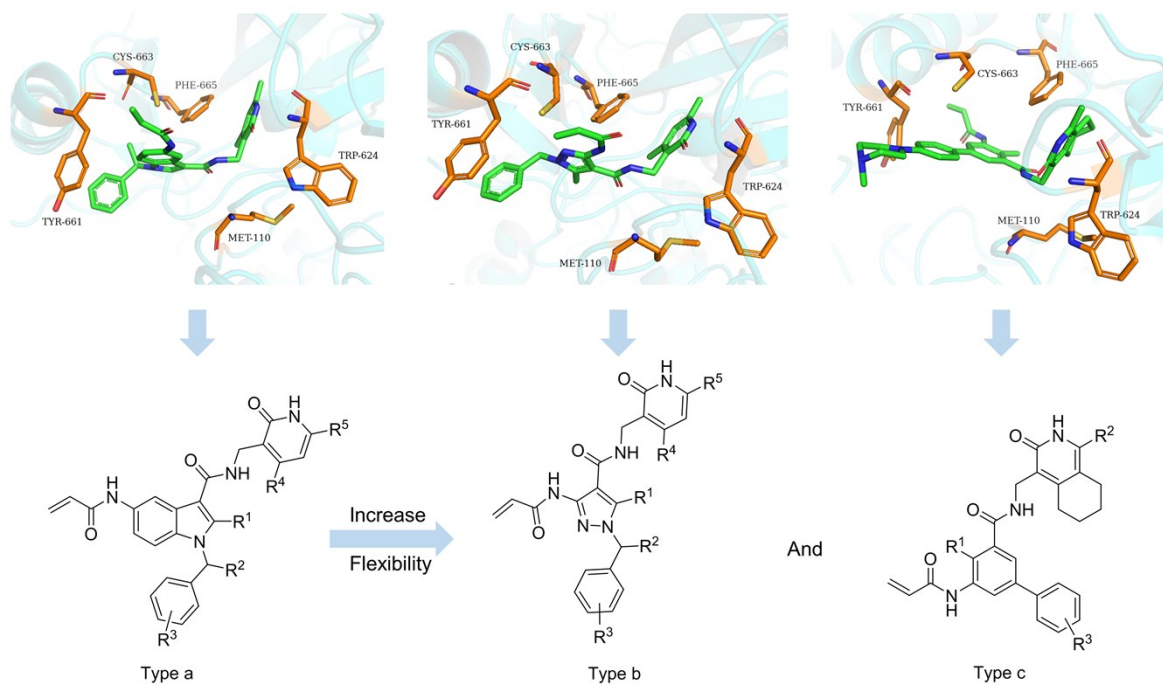

**Fig. S3** Rational design of indole derivatives, pyrazole derivatives and benzene derivatives.

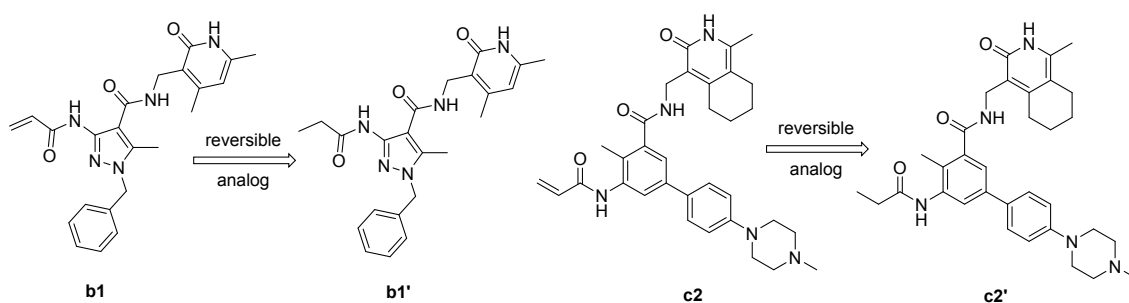

**Fig. S4** Chemical structures of compounds **b1**, **c2** and their reversible analogs **b1'**, **c2'**.

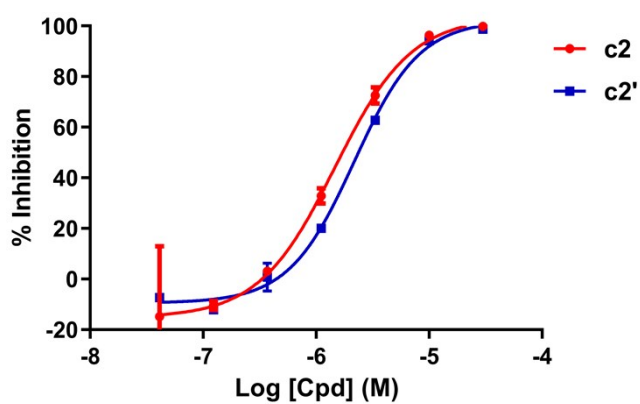

**Fig. S5** Inhibition curves of compound **c2** and its reversible analog **c2'** on EZH2<sup>WT</sup>. Data are expressed as the mean  $\pm$  SD (n = 2).

**Tab. S1** Inhibitory activity of compounds **b3-b15** on EZH2<sup>WT</sup>.

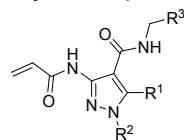

| Cpd.                     | R <sup>1</sup>  | R <sup>2</sup> | R <sup>3</sup> | IC <sub>50</sub> (μM) [a] | Cpd.          | R <sup>1</sup>  | R <sup>2</sup> | R <sup>3</sup> | IC <sub>50</sub> (μM) [a] |
|--------------------------|-----------------|----------------|----------------|---------------------------|---------------|-----------------|----------------|----------------|---------------------------|
| <b>b3</b>                | CH <sub>3</sub> |                |                | 5.243 ± 1.037             | <b>b11</b>    | H               |                |                | >10                       |
| <b>b4</b><br>(SKLB-0335) | CH <sub>3</sub> |                |                | 0.064 ± 0.002             | <b>b12</b>    | CH <sub>3</sub> |                |                | 0.109 ± 0.027             |
| <b>b5</b>                | CH <sub>3</sub> |                |                | >10                       | <b>b13</b>    | CH <sub>3</sub> |                |                | >10                       |
| <b>b6</b>                | CH <sub>3</sub> |                |                | 2.663 ± 0.161             | <b>b14</b>    | CH <sub>3</sub> |                |                | 2.545 ± 0.006             |
| <b>b7</b>                | CH <sub>3</sub> |                |                | 1.368 ± 0.110             | <b>b15</b>    | CH <sub>3</sub> |                |                | 0.710 ± 0.144             |
| <b>b8</b>                | H               |                |                | 7.661 ± 0.724             | <b>(S)-b4</b> | CH <sub>3</sub> |                |                | 0.108 ± 0.016             |
| <b>b9</b>                | H               |                |                | >10                       | <b>(R)-b4</b> | CH <sub>3</sub> |                |                | 0.042 ± 0.016             |
| <b>b10</b>               | H               |                |                | >10                       |               |                 |                |                |                           |

[a] Data are expressed as the mean ± SEM for at least 2 independent experiments.

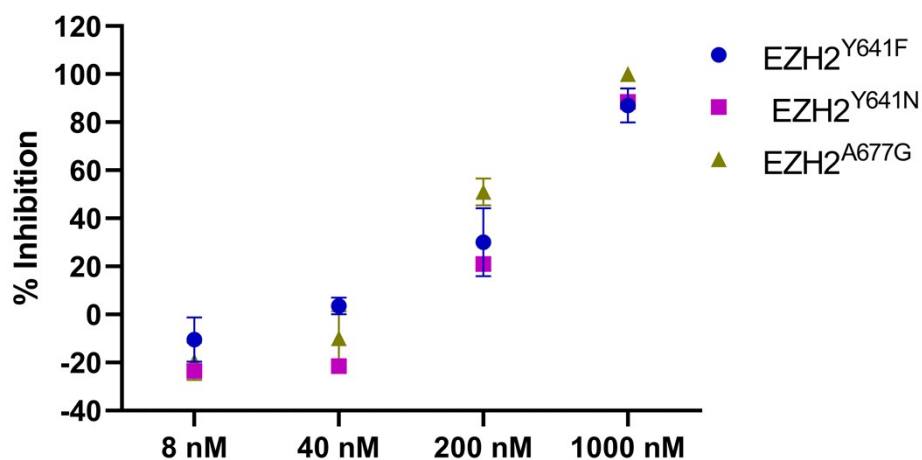

**Fig. S6** Potency of SKLB-0335 against mutant EZH2. Data are expressed as the mean ± SD (n = 2).

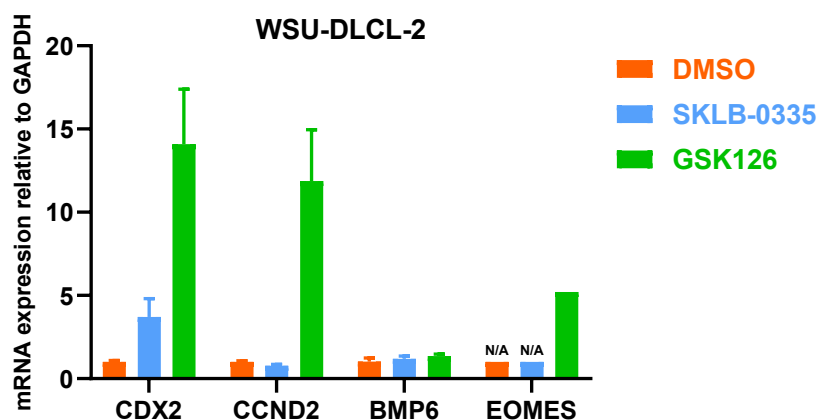

**Fig. S7** The mRNA levels of genes silenced by EZH1 in WSU-DLCL-2 cells after treatment with compounds for 5 days. Data are expressed as the mean ± SD (n = 3).

**Scheme S1**<sup>[a]</sup>

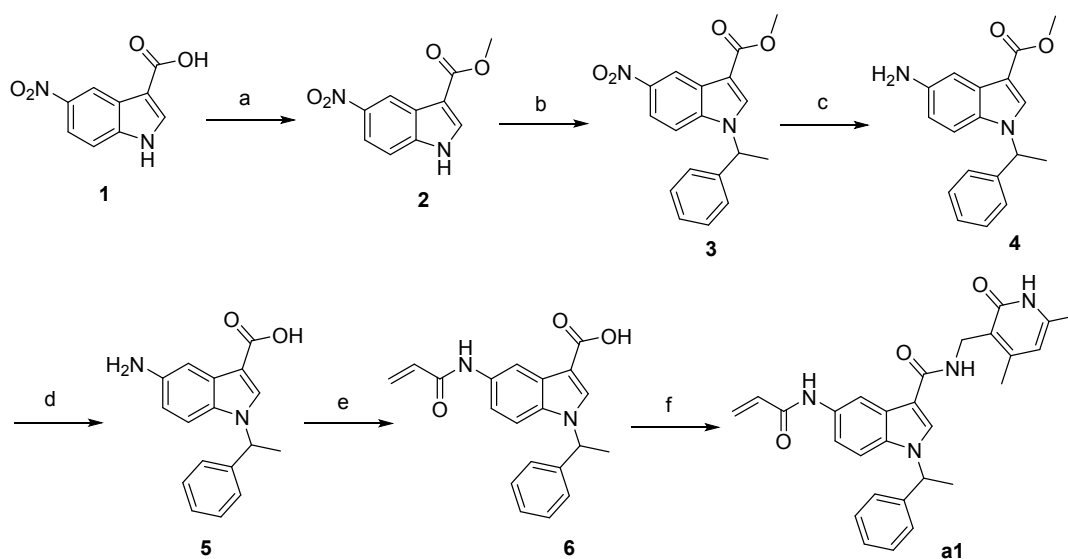

<sup>[a]</sup>Reagents and conditions: (a) H<sub>2</sub>SO<sub>4</sub>, CH<sub>3</sub>OH, 80 °C, 6 h; (b) NaH, DMF, r.t., 4 h; (c) Fe, NH<sub>4</sub>Cl, CH<sub>3</sub>OH/H<sub>2</sub>O, reflux, 1 h; (d) NaOH, EtOH, 60 °C, 1 h; (e) Acryloyl chloride, K<sub>2</sub>CO<sub>3</sub>, DCM, r.t., 4 h; (f) 3-(aminomethyl)-4,6-dimethylpyridin-2(1*H*)-one, EDCI, HOAT, NMM, DMSO, r.t., overnight.

**Scheme S2**<sup>[b]</sup>

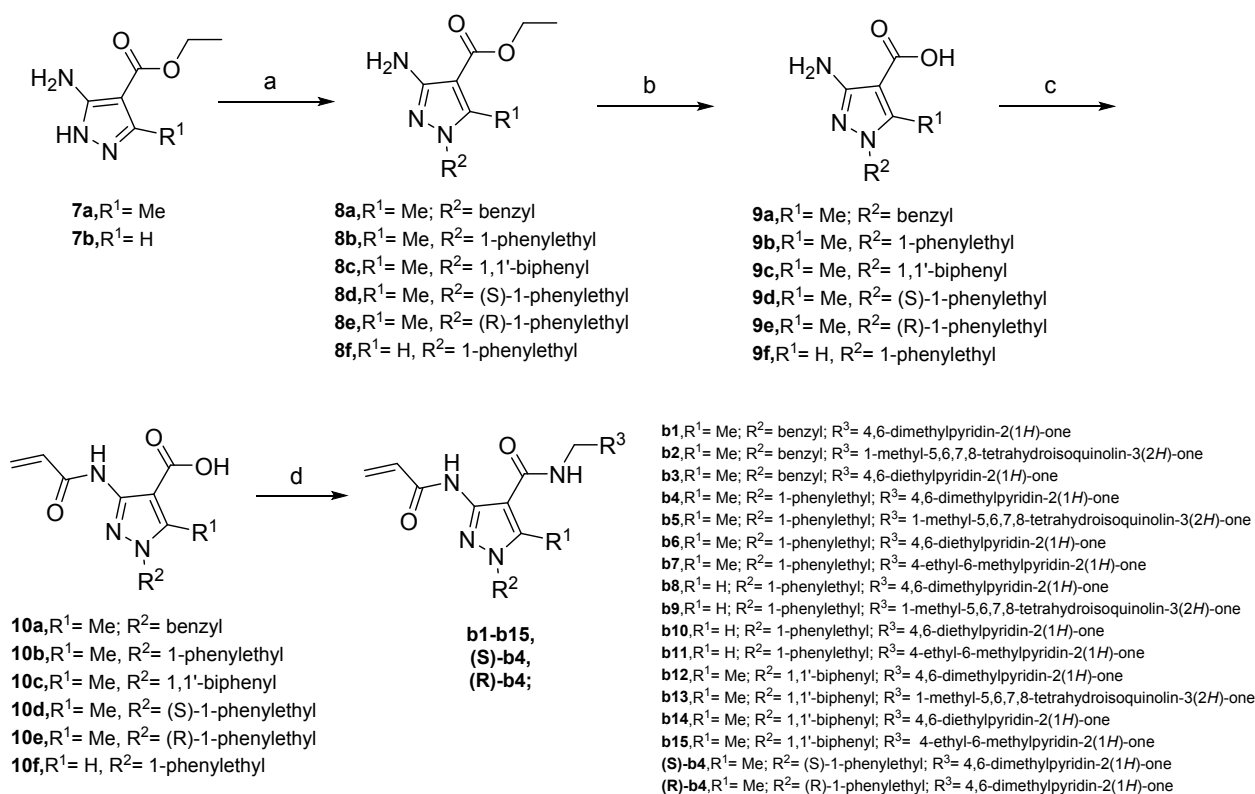

<sup>[b]</sup>Reagents and conditions: (a) CsCO<sub>3</sub>, DMF, r.t., 4 h; (b) NaOH, CH<sub>3</sub>OH/H<sub>2</sub>O, 80 °C, 4 h; (c) Acryloyl chloride, K<sub>2</sub>CO<sub>3</sub>, DCM, r.t., 4 h; (d) 3-(aminomethyl)-pyridin-2(1*H*)-one derivatives, EDCI, HOAT, NMM, DMSO, r.t., overnight.

Scheme S3<sup>[c]</sup>

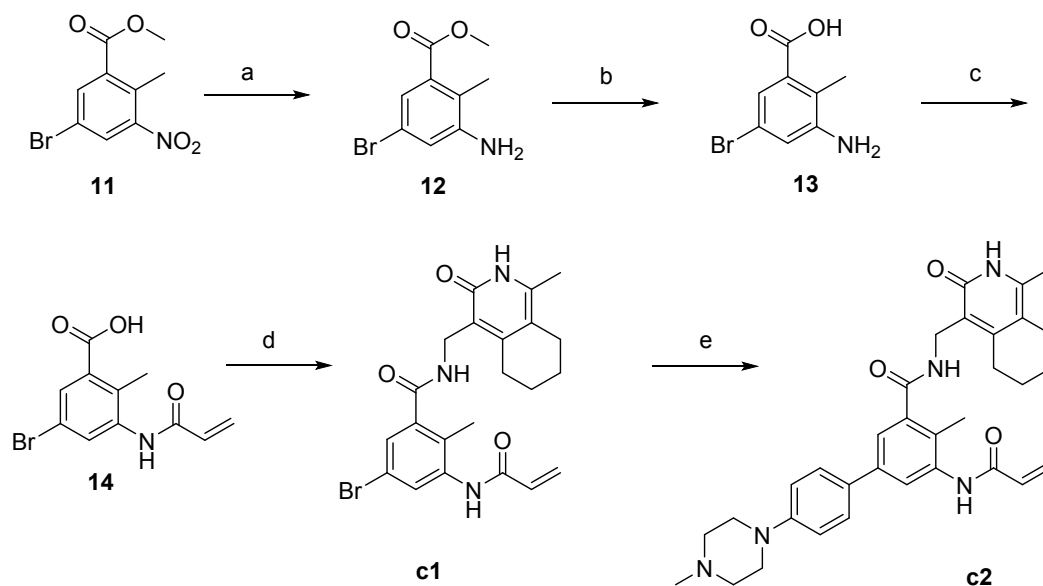

<sup>[c]</sup>Reagents and conditions: (a) Fe, NH<sub>4</sub>Cl, CH<sub>3</sub>OH/H<sub>2</sub>O, 85 °C, 0.5 h; (b) NaOH, CH<sub>3</sub>OH/H<sub>2</sub>O, 80 °C, 4 h; (c) Acryloyl chloride, K<sub>2</sub>CO<sub>3</sub>, DCM, r.t., 4 h; (d) 4-(aminomethyl)-1-methyl-5,6,7,8-tetrahydroisoquinolin-3(2H)-one, EDCI, HOAT, NMM, DMSO, r.t., overnight; (e) 4-(4-methyl-1-piperazinyl)benzeneboronic acid pinacol ester, PdCl<sub>2</sub>(dppf)·CH<sub>2</sub>Cl<sub>2</sub>, Na<sub>2</sub>CO<sub>3</sub>, dioxane/water, 100 °C, 4 h.

## General chemistry experiment and information.

Unless otherwise noted, all materials were obtained from commercial suppliers and used without further purification. The reference compound GSK126 was purchased from MedChemExpress (China). The <sup>1</sup>H and <sup>13</sup>C NMR spectra were recorded on a Bruker Avance 400 spectrometer at 25 °C using DMSO-*d*<sub>6</sub>, CD<sub>3</sub>OD or CDCl<sub>3</sub> as the solvent. Chemical shifts (δ) are reported in ppm relative to Me<sub>4</sub>Si (internal standard), coupling constants (*J*) are reported in hertz, and peak multiplicity are reported as s (singlet), d (doublet), t (triplet), q (quartet), m (multiplet), or br s (broad singlet). High resolution mass analysis was performed on a Waters Q-TOF Premier mass spectrometer with electron spray ionization (ESI). Thin layer chromatography (TLC) was performed on 0.20 mm silica gel F-254 plates (Qingdao Haiyang Chemical, China). Visualization of TLC was accomplished with UV light and/or aqueous potassium permanganate or I<sub>2</sub> in a silica gel. Column chromatography was performed using silica gel 60 of 300-400 mesh (Qingdao Haiyang Chemical, China). Chemical purities were analyzed by HPLC using Acetonitrile / Water as the mobile phase with a flow rate of 1.0 mL/min on an Phenomenex Gemini C18 column (NO.00F-4435-EO).

## Chemistry experimental procedures.

### The representative procedure for the preparation of indole derivatives.

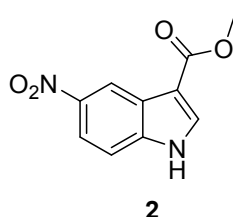

**methyl 5-nitro-1H-indole-3-carboxylate (2).** Sulfuric acid (0.5 ml) was added to the methanol solution (20 ml) of 5-nitro-1H-indole-3-carboxylic acid (206.15 mg, 1 mmol) and reacted at 80 °C for 6 h. After the reaction was completed (monitored by TLC), the reaction solution was concentrated in vacuo. Saturated sodium bicarbonate solution was added to adjust the pH to 8 ~ 9, and ethyl acetate was added for extraction. The combined organic phase was dried over sodium sulfate, filtered and concentrated in vacuo to provide compound **2**. Tan solid 216 mg, yield: 98.1%. <sup>1</sup>H NMR (400 MHz, DMSO-*d*<sub>6</sub>) δ 8.84 (d, *J* = 2.3 Hz, 1H), 8.34 (s, 1H), 8.05 (dd, *J* = 9.0, 2.5 Hz, 1H), 7.64 (d, *J* = 8.9 Hz, 1H), 3.85 (s, 3H).

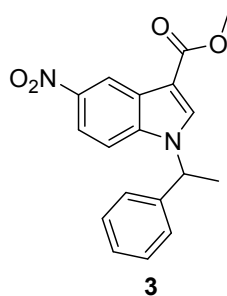

**methyl 5-nitro-1-(1-phenylethyl)-1H-indole-3-carboxylate (3).** Sodium hydride (76 mg, 60%, 1.90 mmol) was dissolved in 5 ml of N, N-dimethylformamide and added to the flask, methyl 5-nitro-1H-indole-3-carboxylate (216 mg, 0.95 mmol) dissolved in 10 ml N, N-dimethylformamide was added to the flask, and the mixed solution was stirred at 40 °C for 0.5 h. Then, 1-bromoethylbenzene (156  $\mu$ l, 1.14 mmol) was added and stirred at room temperature for 4 h. After the reaction was detected by TLC, 30 ml of cold water was added to quench the reaction, and extracted with ethyl acetate. Dry over anhydrous sodium sulfate, filtered, and column chromatography to obtain the target compound. Light yellow solid 227 mg, yield: 73.7%.  $^1\text{H NMR}$  (400 MHz,  $\text{DMSO}-d_6$ )  $\delta$  8.87 (d,  $J$  = 2.4 Hz, 1H), 8.68 (s, 1H), 8.09 (dd,  $J$  = 9.1, 2.4 Hz, 1H), 7.82 (d,  $J$  = 9.2 Hz, 1H), 7.38 -7.32 (m, 4H), 7.30 – 7.24 (m, 1H), 6.07 (q,  $J$  = 7.0 Hz, 1H), 3.89 (s, 3H), 1.96 (d,  $J$  = 7.0 Hz, 3H).

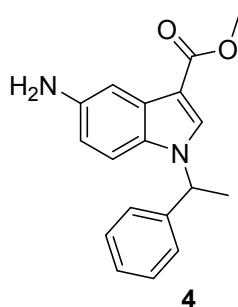

**methyl 5-amino-1-(1-phenylethyl)-1H-indole-3-carboxylate (4).** Compound **3** (227 mg, 0.7 mmol), ammonium chloride (187.25 mg, 3.5 mmol) was added to a solution of methanol / water (18 ml / 6 ml). While the reaction solution was refluxing, iron powder (196 mg, 3.5 mmol) was added, and the reaction was continued for 1 h. After the reaction was completed (monitored by TLC), added a layer of diatomaceous earth to filter the hot reaction liquid. The diatomaceous earth was washed twice with acetone and the filtrate was collected. The combined organic phase was dried over sodium sulfate, filtered and concentrated in vacuo to provide compound **4**. The product was used for the next step directly. Brown viscous liquid 202 mg, yield: 98.0%.  $^1\text{H NMR}$  (400 MHz,  $\text{DMSO}-d_6$ )  $\delta$  8.10 (s, 1H), 7.33 – 7.21 (m, 5H), 7.19 – 7.17 (m, 1H), 7.15 (d,  $J$  = 8.7 Hz, 1H), 6.51 (dd,  $J$  = 8.7, 2.2 Hz, 1H), 5.73 (q,  $J$  = 7.0 Hz, 1H), 4.80 (s, 2H), 3.77 (s, 3H), 1.86 (d,  $J$  = 7.0 Hz, 3H).

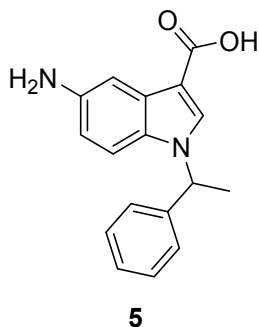

**5-amino-1-(1-phenylethyl)-1H-indole-3-carboxylic acid (5).** A mixture of compound **4** (160 mg, 0.54 mmol), sodium hydroxide (32.4 mg, 0.81 mmol), and EtOH (10 mL) was stirred at 60 °C for 1 h. The reaction was acidified to pH ~3 with 1M hydrochloric acid and then extracted with EtOAc (3X). The combined organic phase was dried over sodium sulfate, filtered and concentrated in vacuo to provide the crude compound. The crude compound was purified by column chromatography eluting with MeOH/DCM to afford the desired compound **5**. Brown solid 60 mg, yield: 39.9%.  $^1\text{H NMR}$  (400 MHz, Chloroform- $d$ )  $\delta$  8.01 (s, 1H), 7.52 (d,  $J$  = 2.2 Hz, 1H), 7.34 – 7.27 (m, 3H), 7.14 (dd,  $J$  = 6.9, 1.9 Hz, 2H), 7.01 (d,  $J$  = 8.7 Hz, 1H), 6.62 (dd,  $J$  = 8.7, 2.3 Hz, 1H), 5.58 (q,  $J$  = 7.0 Hz, 1H), 1.93 (d,  $J$  = 7.0 Hz, 3H).



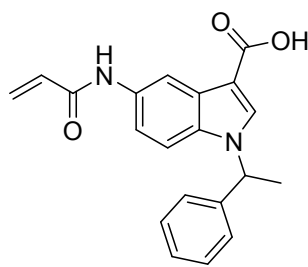

**6**

**5-acrylamido-1-(1-phenylethyl)-1H-indole-3-carboxylic acid (6).** Added compound **5** (60 mg, 0.214 mmol) and potassium carbonate (88.6 mg, 0.642 mmol) to tetrahydrofuran. Acryloyl chloride (35  $\mu$ L, 0.428 mmol) was added at 0 °C. The reaction solution was reacted at room temperature for 4 hours. After completion (monitored by TLC), the reaction solution was concentrated under vacuum. Added water and DCM for extraction, adjusted the pH to 4 ~ 5, and collected the organic phase. The crude compound was purified by column chromatography eluting with MeOH/DCM to afford the desired compound. Darkorange solid 45 mg, yield: 58.0%. <sup>1</sup>H NMR (400 MHz, Chloroform-*d*)  $\delta$  9.21 (s, 1H), 8.56 (s, 1H), 8.03 (s, 1H), 7.69 (d, *J* = 8.9 Hz, 1H), 7.30 – 7.20 (m, 3H), 7.09 (t, *J* = 8.3 Hz, 2H), 6.60 (dd, *J* = 16.8, 10.1 Hz, 1H), 6.45 (d, *J* = 16.7 Hz, 1H), 5.68 (d, *J* = 10.1 Hz, 1H), 5.57 (q, *J* = 7.1 Hz, 1H), 1.88 (d, *J* = 7.0 Hz, 3H).

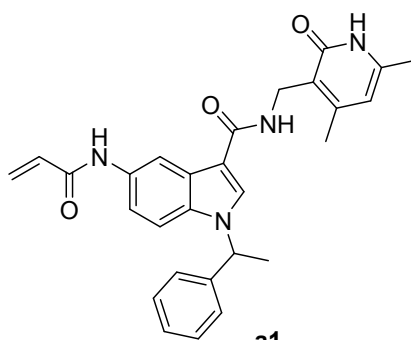

**a1**

**5-acrylamido-N-((4,6-dimethyl-2-oxo-1,2-dihydropyridin-3-yl)methyl)-1-(1-phenylethyl)-1H-indole-3-carboxamide (a1).** Compound **6** (45 mg, 0.135 mmol), 3-(aminomethyl)-4,6-dimethylpyridin-2(1H)-one (40.98 mg, 0.27 mmol), obtained following the reference procedure<sup>[1]</sup>, 1-(3-dimethylaminopropyl)-3-ethylcarbodiimide hydrochloride (EDCI) (46.58 mg, 0.243 mmol), 1-hydroxy-7-azobenzotriazole (HOAT) (33.07 mg, 0.243 mmol), N-methylmorpholine (74  $\mu$ L, 0.675 mmol) was added to DMSO (5 ml) and reacted at room temperature overnight. After the reaction was completed, the reaction solution was poured into water and DCM for extraction. The organic phase was collected and dried in vacuo to obtain the crude product. The crude compound was purified by column chromatography eluting with MeOH/DCM to afford the desired compound **a1**. Light green solid 50 mg, yield: 79.0%. <sup>1</sup>H NMR (400 MHz, Chloroform-*d*)  $\delta$  12.78 (s, 1H), 8.93 (s, 1H), 7.99 (s, 1H), 7.95 (s, 1H), 7.91 (t, *J* = 5.8 Hz, 1H), 7.51 (d, *J* = 8.9 Hz, 1H), 7.15 (q, *J* = 8.2, 7.5 Hz, 2H), 7.04 (d, *J* = 8.9 Hz, 1H), 7.00 (d, *J* = 7.2 Hz, 2H), 6.01 (d, *J* = 4.3 Hz, 2H), 5.77 (s, 1H), 5.47 (q, *J* = 7.0 Hz, 1H), 5.19 (dd, *J* = 7.6, 4.2 Hz, 1H), 4.52 (d, *J* = 5.7 Hz, 2H), 2.22 (s, 3H), 1.99 (s, 3H), 1.78 (d, *J* = 7.0 Hz, 3H). <sup>13</sup>C NMR (101 MHz, Chloroform-*d*)  $\delta$  165.60, 164.56, 164.02, 149.98, 142.99, 141.43, 134.00, 132.74, 131.04, 130.68, 128.8 (2C), 127.85, 126.16, 125.83 (2C), 124.85, 122.26, 116.68, 111.57, 111.36, 111.27, 110.14, 55.69, 35.87, 21.76, 19.53, 18.52. HRMS *m/z* calculated for C<sub>28</sub>H<sub>28</sub>N<sub>4</sub>NaO<sub>3</sub> [M + Na]<sup>+</sup> 491.2059, found 491.2063. *t<sub>R</sub>* (HPLC) = 2.12 min; Purity > 95%.

**The representative procedure for the preparation of pyrazole derivatives.**

**The representative procedure for the preparation of 8a-8f.**

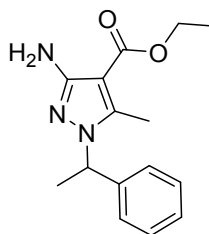

**8b**

**ethyl 3-amino-5-methyl-1-(1-phenylethyl)-1H-pyrazole-4-carboxylate (8b).** To a solution of ethyl 5-amino-3-methyl-1H-pyrazole-4-carboxylate (338.36 mg, 2 mmol) in DMF (15 mL) was added (1-bromoethyl) benzene (370  $\mu$ M, 2.4 mmol) and cesium carbonate (1303.28 mg, 4 mmol). The mixture was stirred at 20 °C and stirred for 4 h. After the reaction was completed (monitored by TLC), water / dichloromethane was added for extraction. Dry over anhydrous sodium sulfate, filtered, and column chromatography to give ethyl 5-amino-3-methyl-1-(1-phenylethyl)-1H-pyrazole-4-carboxylate (Light yellow oily liquid, 240 mg, 43.9%) and ethyl 3-amino-5-methyl-1-(1-phenylethyl)-1H-pyrazole-4-carboxylate (White solid, 210 mg, 38.4%, desired). The isomers were distinguished

by H-H NOESY spectrum. The spectrums of these compounds were shown below.  $^1\text{H}$  NMR (400 MHz,  $\text{DMSO}-d_6$ )  $\delta$  7.33 – 7.29 (m, 2H), 7.25 (d,  $J = 7.2$  Hz, 1H), 7.21 (dd,  $J = 7.0, 1.6$  Hz, 2H), 5.51 (q,  $J = 6.8$  Hz, 1H), 5.34 (s, 2H), 4.17 (q,  $J = 7.1$  Hz, 2H), 2.37 (s, 3H), 1.70 (d,  $J = 6.9$  Hz, 3H), 1.25 (t,  $J = 7.1$  Hz, 3H).

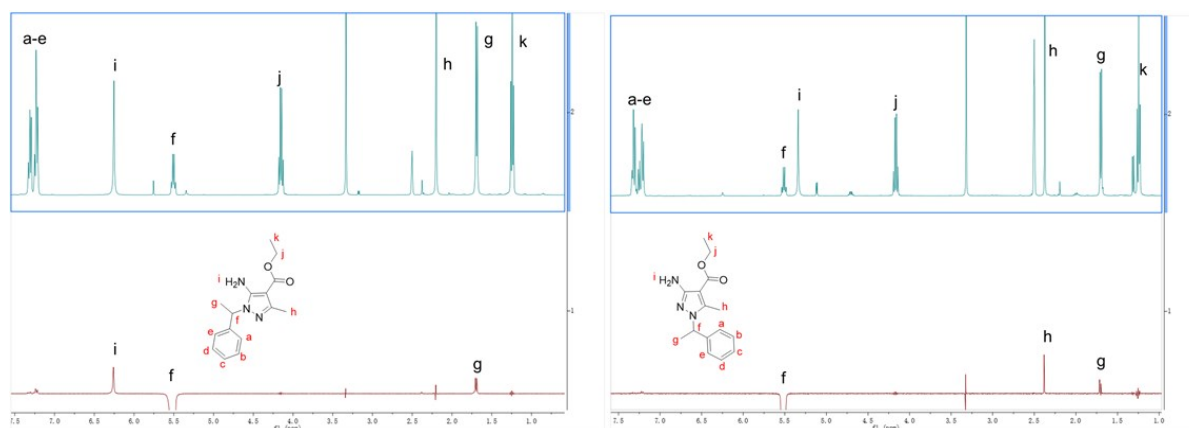

**ethyl 3-amino-1-benzyl-5-methyl-1H-pyrazole-4-carboxylate (8a).** White solid, yield: 41.7%.  $^1\text{H}$  NMR (400 MHz,  $\text{DMSO}-d_6$ )  $\delta$  7.35 – 7.22 (m, 3H), 7.14 – 7.10 (m, 2H), 5.28 (s, 2H), 5.09 (s, 2H), 4.16 (q,  $J = 7.1$  Hz, 2H), 2.38 (s, 3H), 1.24 (t,  $J = 7.1$  Hz, 3H).

**ethyl 1-([1,1'-biphenyl]-4-ylmethyl)-3-amino-5-methyl-1H-pyrazole-4-carboxylate (8c).** Light yellow solid, yield: 38.2%.  $^1\text{H}$  NMR (400 MHz,  $\text{DMSO}-d_6$ )  $\delta$  7.65 – 7.58 (m, 4H), 7.44 (dd,  $J = 8.4, 6.9$  Hz, 2H), 7.37 – 7.31 (m, 1H), 7.22 (d,  $J = 8.3$  Hz, 2H), 5.30 (s, 2H), 5.13 (s, 2H), 4.17 (q,  $J = 7.1$  Hz, 2H), 2.41 (s, 3H), 1.25 (t,  $J = 7.1$  Hz, 3H).

**ethyl (S)-3-amino-5-methyl-1-(1-phenylethyl)-1H-pyrazole-4-carboxylate (8d).** Using (R)-(1-bromoethyl)benzene (obtained following the reference procedure<sup>[2]</sup>) as raw material, a similar reaction step as compound **8b** was performed to obtain the target compound. White solid, yield: 34.2%.  $^1\text{H}$  NMR (400 MHz,  $\text{DMSO}-d_6$ )  $\delta$  7.32 (dd,  $J = 8.1, 6.5$  Hz, 2H), 7.27 – 7.24 (m, 1H), 7.23 – 7.18 (m, 2H), 5.51 (q,  $J = 6.9$  Hz, 1H), 5.33 (s, 2H), 4.17 (q,  $J = 7.1$  Hz, 2H), 2.37 (s, 3H), 1.70 (d,  $J = 6.8$  Hz, 3H), 1.25 (t,  $J = 7.1$  Hz, 3H).

**ethyl (R)-3-amino-5-methyl-1-(1-phenylethyl)-1H-pyrazole-4-carboxylate (8e).** Using (S)-(1-bromoethyl)benzene (obtained following the reference procedure<sup>[2]</sup>) as raw material, a similar reaction step as compound **8b** was performed to obtain the target compound. White solid, yield: 38.1%.  $^1\text{H}$  NMR (400 MHz,  $\text{DMSO}-d_6$ )  $\delta$  7.32 (t,  $J = 7.4$  Hz, 2H), 7.27 – 7.24 (m, 1H), 7.24 – 7.20 (m, 2H), 5.51 (q,  $J = 6.9$  Hz, 1H), 5.33 (s, 2H), 4.17 (q,  $J = 7.1$  Hz, 2H), 2.38 (s, 3H), 1.71 (d,  $J = 6.9$  Hz, 3H), 1.25 (t,  $J = 7.0$  Hz, 3H).

**ethyl 3-amino-1-(1-phenylethyl)-1H-pyrazole-4-carboxylate (8f).** White solid, yield: 56.1%.  $^1\text{H}$  NMR (400 MHz,  $\text{DMSO}-d_6$ )  $\delta$  8.05 (s, 1H), 7.36 – 7.31 (m, 2H), 7.29 – 7.24 (m, 3H), 5.40 – 5.28 (m, 3H), 4.16 (q,  $J = 7.1$  Hz, 2H), 1.73 (d,  $J = 7.0$  Hz, 3H), 1.24 (t,  $J = 7.1$  Hz, 3H).

The representative procedure for the preparation of 9a-9f.

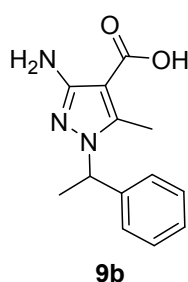

**3-amino-5-methyl-1-(1-phenylethyl)-1H-pyrazole-4-carboxylic acid (9b).** 3-amino-5-methyl-1-(1-phenylethyl)-1H-pyrazole-4-carboxylic acid ethyl ester (210 mg, 0.77 mmol) and sodium hydroxide (92.4 mg, 2.31 mmol) were added to methanol / water mixed solution (10 ml / 10 ml). The solution was reacted at 80 °C for 16 h. After the reaction was completed (monitored by TLC), the reaction solution was concentrated under vacuum. Added water and DCM for extraction, adjusted the pH to 3 ~ 4, and collected the organic phase. Concentrated and dried in vacuo to obtain the target compound. Light yellow solid 151.2 mg, yield: 80.1%.  $^1\text{H}$  NMR (400 MHz,  $\text{DMSO}-d_6$ )  $\delta$  7.32 (dd,  $J = 8.1, 6.6$  Hz, 2H), 7.25 (d,  $J = 7.3$  Hz, 1H), 7.23 – 7.18 (m, 2H), 5.49 (q,  $J = 6.8$  Hz, 1H), 2.36 (s, 3H), 1.70 (d,  $J = 6.9$  Hz, 3H).

**3-amino-1-benzyl-5-methyl-1H-pyrazole-4-carboxylic acid (9a).** Light yellow solid, yield: 85.3%.  $^1\text{H}$  NMR (400 MHz,  $\text{DMSO}-d_6$ )  $\delta$  7.39 – 7.24 (m, 3H), 7.19 – 7.10 (m, 2H), 5.10 (s, 2H), 2.38 (s, 3H).

**1-([1,1'-biphenyl]-4-ylmethyl)-3-amino-5-methyl-1H-pyrazole-4-carboxylic acid (9c).** Light yellow solid, yield: 88.1%.  $^1\text{H}$  NMR (400 MHz,  $\text{DMSO}-d_6$ )  $\delta$  7.66 – 7.60 (m, 4H), 7.45 (t,  $J = 7.7$  Hz, 2H), 7.38 – 7.32 (m, 1H), 7.26 – 7.22 (m, 2H), 5.13 (s, 2H), 2.41 (s, 3H).

**(S)-3-amino-5-methyl-1-(1-phenylethyl)-1H-pyrazole-4-carboxylic acid (9d).** White solid, yield: 99.2%. <sup>1</sup>H NMR (400 MHz, DMSO-*d*<sub>6</sub>) δ 7.32 (dd, *J* = 8.1, 6.5 Hz, 2H), 7.27 – 7.24 (m, 1H), 7.23 – 7.19 (m, 2H), 5.49 (q, *J* = 6.9 Hz, 1H), 2.36 (s, 3H), 1.70 (d, *J* = 6.9 Hz, 3H).

**(R)-3-amino-5-methyl-1-(1-phenylethyl)-1H-pyrazole-4-carboxylic acid (9e).** White solid, yield: 95.9%. <sup>1</sup>H NMR (400 MHz, DMSO-*d*<sub>6</sub>) δ 7.31 (dd, *J* = 8.1, 6.6 Hz, 2H), 7.25 (d, *J* = 7.2 Hz, 1H), 7.22 – 7.18 (m, 2H), 5.48 (q, *J* = 6.9 Hz, 1H), 2.35 (s, 3H), 1.70 (d, *J* = 6.8 Hz, 3H).

**3-amino-1-(1-phenylethyl)-1H-pyrazole-4-carboxylic acid (9f).** Light yellow solid, yield: 99.1%. <sup>1</sup>H NMR (400 MHz, DMSO-*d*<sub>6</sub>) δ 11.92 (s, 1H), 8.00 (s, 1H), 7.36 – 7.30 (m, 2H), 7.29 – 7.24 (m, 3H), 5.35 (q, *J* = 7.0 Hz, 1H), 1.72 (d, *J* = 7.0 Hz, 3H).

The representative procedure for the preparation of 10a-10f.

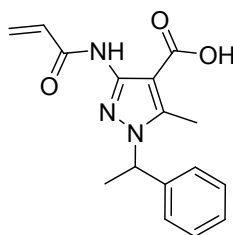

10b

**3-acrylamido-5-methyl-1-(1-phenylethyl)-1H-pyrazole-4-carboxylic acid (10b).** Added 3-amino-5-methyl-1-(1-phenylethyl)-1H-pyrazole-4-carboxylic acid (80 mg, 0.326 mmol) and potassium carbonate (135.17 mg, 0.978 mmol) to tetrahydrofuran. Acryloyl chloride (52 μL, 0.65 mmol) was added dropwise at 0 °C. The reaction solution was reacted at room temperature for 4 hours. After completion (monitored by TLC), the reaction solution was concentrated under vacuum. Add water and ethyl acetate for extraction, adjust the pH to 4 ~ 5, and collect the organic phase. The crude compound was purified by column chromatography eluting with MeOH/DCM to afford the desired compound. Light yellow solid 67 mg, yield: 68.7%. <sup>1</sup>H NMR (400 MHz, Chloroform-*d*) δ 9.19 (s, 1H), 7.32 (t, *J* = 7.2 Hz, 2H), 7.28 – 7.22 (m, 3H), 6.49 (d, *J* = 16.0 Hz, 1H), 5.81 (d, *J* = 11.1 Hz, 1H), 5.66 – 5.60 (m, 1H), 5.45 (q, *J* = 7.0 Hz, 1H), 2.42 (s, 3H), 1.94 (d, *J* = 7.0 Hz, 3H).

**3-acrylamido-1-benzyl-5-methyl-1H-pyrazole-4-carboxylic acid (10a).** Light yellow solid, yield: 45.5%. <sup>1</sup>H NMR (400 MHz, DMSO-*d*<sub>6</sub>) δ 12.43 (s, 1H), 10.10 (s, 1H), 7.38 – 7.26 (m, 3H), 7.15 (dd, *J* = 7.1, 1.6 Hz, 2H), 6.08 (dd, *J* = 17.3, 10.2 Hz, 1H), 5.86 (dd, *J* = 10.3, 1.8 Hz, 1H), 5.72 (dd, *J* = 10.2, 1.9 Hz, 1H), 5.29 (s, 2H), 2.44 (s, 3H).

**1-([1,1'-biphenyl]-4-ylmethyl)-3-acrylamido-5-methyl-1H-pyrazole-4-carboxylic acid (10c).** White solid, yield: 71.6%. <sup>1</sup>H NMR (400 MHz, DMSO-*d*<sub>6</sub>) δ 12.48 (s, 1H), 9.89 (s, 1H), 7.65 (dd, *J* = 7.9, 2.2 Hz, 4H), 7.46 (t, *J* = 7.6 Hz, 2H), 7.36 (t, *J* = 7.3 Hz, 1H), 7.26 (dd, *J* = 8.3, 1.9 Hz, 2H), 6.52 – 6.40 (m, 1H), 6.19 (dd, *J* = 17.1, 1.9 Hz, 1H), 5.73 (dd, *J* = 10.2, 1.9 Hz, 1H), 5.35 (d, *J* = 2.9 Hz, 2H), 2.49 (s, 3H).

**(S)-3-acrylamido-5-methyl-1-(1-phenylethyl)-1H-pyrazole-4-carboxylic acid (10d).** Light yellow solid, yield: 57.0%. <sup>1</sup>H NMR (400 MHz, DMSO-*d*<sub>6</sub>) δ 12.13 (s, 1H), 10.18 (s, 1H), 7.41 – 7.25 (m, 5H), 6.45 (dd, *J* = 17.4, 10.0 Hz, 1H), 6.41 – 6.33 (m, 1H), 5.96 (dd, *J* = 10.0, 1.9 Hz, 1H), 5.86 (q, *J* = 6.9 Hz, 1H), 2.58 (s, 3H), 1.83 (d, *J* = 6.9 Hz, 3H).

**(R)-3-acrylamido-5-methyl-1-(1-phenylethyl)-1H-pyrazole-4-carboxylic acid (10e).** Light yellow solid, yield: 61.2%. <sup>1</sup>H NMR (400 MHz, DMSO-*d*<sub>6</sub>) δ 12.24 (s, 1H), 10.49 (s, 1H), 7.33 (dd, *J* = 8.1, 6.5 Hz, 2H), 7.28 – 7.24 (m, 1H), 7.21 (dd, *J* = 7.0, 1.7 Hz, 2H), 6.51 – 6.35 (m, 1H), 6.19 (d, *J* = 16.9 Hz, 1H), 5.72 (dd, *J* = 10.1, 2.0 Hz, 1H), 5.62 (q, *J* = 6.8 Hz, 1H), 2.41 (s, 3H), 1.76 (d, *J* = 6.9 Hz, 3H).

**3-acrylamido-1-(1-phenylethyl)-1H-pyrazole-4-carboxylic acid (10f).** Light yellow solid, yield: 57.5%. <sup>1</sup>H NMR (400 MHz, DMSO-*d*<sub>6</sub>) δ 12.04 (s, 1H), 11.17 (s, 1H), 7.73 (s, 1H), 7.33 (t, *J* = 7.3 Hz, 2H), 7.29 – 7.20 (m, 3H), 6.29 – 6.09 (m, 2H), 5.73 (d, *J* = 10.1 Hz, 1H), 5.47 (q, *J* = 7.1 Hz, 1H), 1.75 (d, *J* = 7.1 Hz, 3H).

The representative procedure for the preparation of (b1-b15, (S)-b4, (R)-b4, b1', b4').

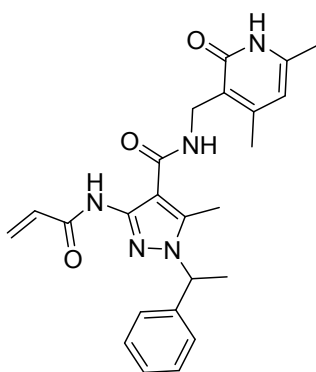

**b4**

**3-acrylamido-N-((4,6-dimethyl-2-oxo-1,2-dihydropyridin-3-yl)methyl)-5-methyl-1-(1-phenylethyl)-1H-pyrazole-4-carboxamide (b4,SKLB-0335).** Compound **10** (67 mg, 0.224 mmol), 3-(aminomethyl)-4,6-dimethylpyridin-2(1H)-one (68.13 mg, 0.448 mmol), 1-(3-dimethylaminopropyl)-3-ethylcarbodiimide hydrochloride (EDCI) (77.29 mg, 0.403 mmol), 1-hydroxy-7-azobenzotriazole (HOAT) (54.88 mg, 0.403 mmol), N-methylmorpholine (123  $\mu$ L, 1.12 mmol) was added to DMSO (5 ml) and reacted at room temperature overnight. After the reaction was completed, the reaction solution was poured into water and DCM for extraction. The organic phase was collected and dried in vacuo to obtain the crude product. The crude compound was purified by column chromatography eluting with MeOH/DCM to afford the desired compound **b4**. Light yellow solid 28 mg, yield: 28.8%.  $^1\text{H}$  NMR (400 MHz, DMSO- $d_6$ )  $\delta$  11.40 (s, 1H), 10.10 (s, 1H), 7.32 (dd,  $J$  = 8.1, 6.5 Hz, 2H), 7.26 (d,  $J$  = 7.2 Hz, 1H), 7.22 – 7.15 (m, 3H), 6.32 (dd,  $J$  = 17.1, 10.2 Hz, 1H), 6.06 (d,  $J$  = 17.0 Hz, 1H), 5.80 (s, 1H), 5.68 – 5.58 (m, 2H), 4.15 (d,  $J$  = 2.2 Hz, 2H), 2.35 (s, 3H), 2.09 (d,  $J$  = 1.7 Hz, 6H), 1.74 (d,  $J$  = 6.9 Hz, 3H).  $^{13}\text{C}$  NMR (101 MHz, Chloroform- $d$ )  $\delta$  164.37, 163.91, 151.14, 143.88, 142.53, 141.34, 140.11, 130.52, 128.70 (2C), 127.76, 127.64, 125.93 (2C), 125.82, 121.92, 110.08, 107.64, 58.21, 35.16, 21.21, 19.41, 18.48, 10.85. HRMS  $m/z$  calculated for  $\text{C}_{24}\text{H}_{27}\text{N}_5\text{NaO}_3$  [ $\text{M} + \text{Na}$ ] $^+$  456.2012, found 456.2014.  $t_{\text{R}}$  (HPLC) = 1.91 min; Purity > 97%.

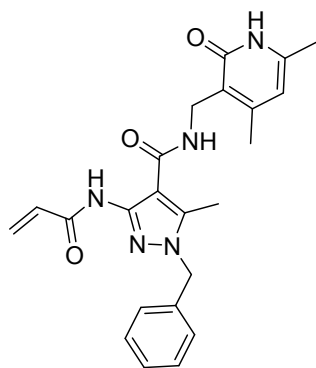

**b1**

**3-acrylamido-1-benzyl-N-((4,6-dimethyl-2-oxo-1,2-dihydropyridin-3-yl)methyl)-5-methyl-1H-pyrazole-4-carboxamide (b1).** Light yellow solid 32 mg, yield: 40.2%.  $^1\text{H}$  NMR (400 MHz, Chloroform- $d$ )  $\delta$  11.21 (s, 1H), 10.11 (s, 1H), 7.40 (s, 1H), 7.27 (d,  $J$  = 7.8 Hz, 3H), 7.14 – 7.06 (m, 2H), 6.38 (s, 2H), 5.92 (s, 1H), 5.73 – 5.67 (m, 1H), 5.30 (s, 2H), 4.46 (d,  $J$  = 5.7 Hz, 2H), 2.36 (s, 3H), 2.34 (s, 3H), 2.20 (s, 3H).  $^{13}\text{C}$  NMR (101 MHz, Chloroform- $d$ )  $\delta$  168.54, 168.36, 167.84, 155.01, 149.20, 146.65, 143.71, 139.79, 134.67, 132.71 (2C), 131.78, 130.70, 130.62 (2C), 125.72, 114.11, 110.04, 56.98, 39.22, 23.30, 22.33, 14.97. HRMS  $m/z$  calculated for  $\text{C}_{23}\text{H}_{25}\text{N}_5\text{NaO}_3$  [ $\text{M} + \text{Na}$ ] $^+$  442.1855, found 442.1858.  $t_{\text{R}}$  (HPLC) = 1.89 min; Purity > 95%.

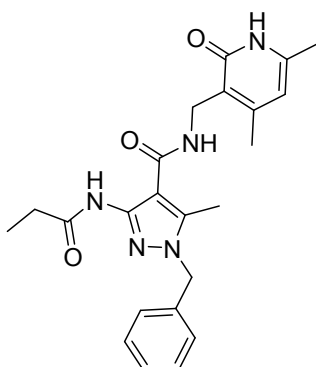

**b1'**

**1-benzyl-N-((4,6-dimethyl-2-oxo-1,2-dihydropyridin-3-yl)methyl)-5-methyl-3-propionamido-1H-pyrazole-4-carboxamide (b1')**. Using propionyl chloride as raw material, a similar reaction step as compound **b1** was performed to obtain the target compound **b1'**. Light yellow solid 46 mg, yield: 30.8% (the last step). <sup>1</sup>H NMR (400 MHz, DMSO-*d*<sub>6</sub>) δ 11.47 (s, 1H), 9.71 (s, 1H), 7.37 – 7.32 (m, 2H), 7.29 (d, *J* = 7.1 Hz, 1H), 7.14 (d, *J* = 7.2 Hz, 2H), 5.84 (s, 1H), 5.25 (s, 2H), 4.18 (d, *J* = 5.3 Hz, 2H), 2.40 (s, 3H), 2.28 – 2.21 (m, 2H), 2.14 (s, 3H), 2.10 (s, 3H), 0.93 (t, *J* = 7.5 Hz, 3H). <sup>13</sup>C NMR (101 MHz, Chloroform-*d*) δ 164.51, 163.87, 150.93, 145.40, 142.61, 139.52, 135.86, 128.78, 128.70 (2C), 127.76, 126.71, 126.62 (2C), 121.84, 110.07, 52.98, 35.19, 30.03, 19.36, 18.39, 11.05, 9.26. HRMS *m/z* calculated for C<sub>23</sub>H<sub>27</sub>N<sub>5</sub>NaO<sub>3</sub> [M + Na]<sup>+</sup> 444.2012, found 444.2009. *t*<sub>R</sub> (HPLC) = 1.92 min; Purity > 99%.

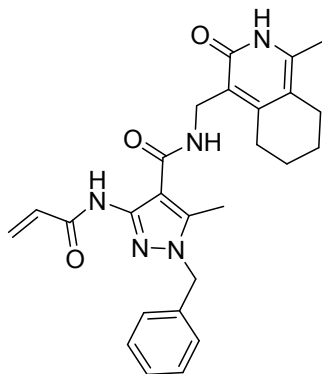

**b2**

**3-acrylamido-1-benzyl-5-methyl-N-((1-methyl-3-oxo-2,3,5,6,7,8-hexahydroisoquinolin-4-yl)methyl)-1H-pyrazole-4-carboxamide (b2)**. Light yellow solid 23 mg, yield: 28.4%. <sup>1</sup>H NMR (400 MHz, Chloroform-*d*) δ 12.54 (s, 1H), 10.21 (s, 1H), 7.62 (s, 1H), 7.36 – 7.19 (m, 3H), 7.10 (d, *J* = 7.2 Hz, 2H), 6.47 – 6.32 (m, 1H), 5.73 – 5.64 (m, 1H), 5.29 (s, 2H), 5.17 – 5.04 (m, 1H), 4.49 (d, *J* = 5.6 Hz, 2H), 3.48 (s, 3H), 2.42 (s, 4H), 2.17 (d, *J* = 3.7 Hz, 3H), 1.73 (d, *J* = 6.3 Hz, 4H). <sup>13</sup>C NMR (101 MHz, Chloroform-*d*) δ 163.88, 163.50, 162.77, 151.59, 140.35, 135.88, 130.87, 128.84, 128.74 (2C), 127.79, 127.66, 126.75, 126.68 (2C), 126.47, 121.18, 115.23, 53.07, 34.82, 27.22, 24.89, 22.13, 22.06, 16.42, 11.12. HRMS *m/z* calculated for C<sub>26</sub>H<sub>29</sub>N<sub>5</sub>NaO<sub>3</sub> [M + Na]<sup>+</sup> 482.2168, found 482.2168. *t*<sub>R</sub> (HPLC) = 2.04 min; Purity > 97%.

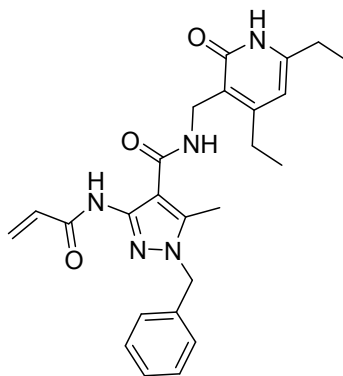

**b3**

**3-acrylamido-1-benzyl-N-((4,6-diethyl-2-oxo-1,2-dihydropyridin-3-yl)methyl)-5-methyl-1H-pyrazole-4-carboxamide (b3)**. Light yellow solid 29 mg, yield: 34.5%. <sup>1</sup>H NMR (400 MHz, DMSO-*d*<sub>6</sub>) δ 11.42 (s, 1H), 10.04 (s, 1H), 7.44 (s, 1H), 7.37 – 7.31 (m, 2H), 7.30 – 7.27 (m, 1H), 7.17 – 7.11 (m, 2H), 6.31 (dd, *J* = 17.3, 10.0 Hz, 1H), 6.05 (d, *J* = 17.0 Hz, 1H), 5.87 (s, 1H), 5.64 (dd, *J* = 10.2, 1.9 Hz, 1H), 5.26 (s, 2H), 4.18 (d, *J* = 5.1 Hz, 2H), 2.46 (q, *J* = 7.5 Hz, 2H), 2.40 (q, *J* = 6.2 Hz, 5H), 1.13 (t, *J* = 7.6 Hz, 3H), 1.07 (t, *J* = 7.6 Hz, 3H). <sup>13</sup>C NMR (101 MHz, Chloroform-*d*) δ 165.02, 164.85, 163.80, 156.45, 148.53, 145.71, 139.17, 135.88, 130.89, 128.73 (2C), 127.78, 127.64, 126.67 (2C), 126.46, 121.25, 106.76, 53.08, 34.88, 26.38, 25.96, 14.48, 12.54, 11.15. HRMS *m/z* calculated for C<sub>25</sub>H<sub>29</sub>N<sub>5</sub>NaO<sub>3</sub> [M + Na]<sup>+</sup> 470.2168, found 470.2166. *t*<sub>R</sub> (HPLC) = 2.10 min; Purity > 95%.

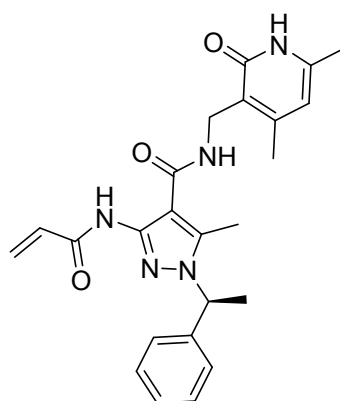

**(S)-b4**

**(S)-3-acrylamido-N-((4,6-dimethyl-2-oxo-1,2-dihydropyridin-3-yl)methyl)-5-methyl-1-(1-phenylethyl)-1H-pyrazole-4-carboxamide ((S)-b4).** Light yellow solid 24 mg, yield: 22.1%. <sup>1</sup>H NMR (400 MHz, Chloroform-*d*) δ 11.18 (s, 1H), 9.64 (s, 1H), 7.25 (d, *J* = 2.8 Hz, 1H), 7.18 (dd, *J* = 14.5, 6.7 Hz, 2H), 7.07 (d, *J* = 7.5 Hz, 2H), 6.32 – 6.20 (m, 2H), 5.87 (s, 1H), 5.64 – 5.57 (m, 1H), 5.36 (q, *J* = 7.2 Hz, 1H), 4.32 (s, 2H), 2.27 (s, 3H), 2.24 (s, 3H), 2.13 (s, 3H), 1.80 (d, *J* = 7.0 Hz, 3H). <sup>13</sup>C NMR (101 MHz, Chloroform-*d*) δ 164.37, 163.87, 151.17, 143.84, 142.53, 141.33, 140.02, 130.58, 128.70 (2C), 127.64, 127.57, 125.92 (2C), 125.86, 121.89, 110.10, 107.56, 58.21, 35.13, 21.20, 19.41, 18.46, 10.85. HRMS *m/z* calculated for C<sub>24</sub>H<sub>27</sub>N<sub>5</sub>NaO<sub>3</sub> [M + Na]<sup>+</sup> 456.2012, found 456.2007. *t<sub>R</sub>* (HPLC) = 1.96 min; Purity > 98%.

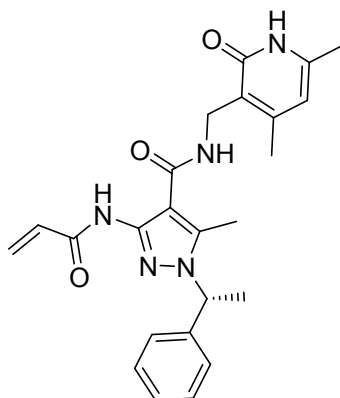

**(R)-b4**

**(R)-3-acrylamido-N-((4,6-dimethyl-2-oxo-1,2-dihydropyridin-3-yl)methyl)-5-methyl-1-(1-phenylethyl)-1H-pyrazole-4-carboxamide ((R)-b4).** Light yellow solid 29 mg, yield: 25.3%. <sup>1</sup>H NMR (400 MHz, DMSO-*d*<sub>6</sub>) δ 11.39 (s, 1H), 10.09 (s, 1H), 7.37 – 7.29 (m, 2H), 7.28 – 7.25 (m, 1H), 7.21 – 7.17 (m, 2H), 6.32 (dd, *J* = 17.0, 10.2 Hz, 1H), 6.06 (d, *J* = 17.1 Hz, 1H), 5.80 (s, 1H), 5.69 – 5.60 (m, 2H), 4.15 (d, *J* = 2.1 Hz, 2H), 2.35 (s, 3H), 2.09 (d, *J* = 1.6 Hz, 6H), 1.74 (d, *J* = 6.8 Hz, 3H). <sup>13</sup>C NMR (101 MHz, Chloroform-*d*) δ 164.44, 163.90, 151.19, 143.80, 142.63, 141.33, 140.05, 130.54, 128.70 (2C), 127.80, 127.64, 125.92 (2C), 125.84, 121.85, 110.11, 107.74, 58.19, 35.12, 21.21, 19.42, 18.46, 10.85. HRMS *m/z* calculated for C<sub>24</sub>H<sub>27</sub>N<sub>5</sub>NaO<sub>3</sub> [M + Na]<sup>+</sup> 456.2012, found 456.2015. *t<sub>R</sub>* (HPLC) = 1.96 min; Purity > 98%.

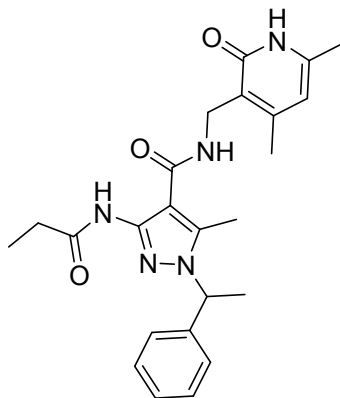

**b4'**

***N*-((4,6-dimethyl-2-oxo-1,2-dihydropyridin-3-yl)methyl)-5-methyl-1-(1-phenylethyl)-3-propionamido-1*H*-pyrazole-4-carboxamide (**b4**<sup>†</sup>)**. Using propionyl chloride as raw material, a similar reaction step as compound **b4** was performed to obtain the target compound **b4**<sup>†</sup>. Light yellow solid 35 mg, yield: 39.1%. <sup>1</sup>H NMR (400 MHz, DMSO-*d*<sub>6</sub>) δ 11.46 (s, 1H), 9.76 (s, 1H), 7.32 (ddd, *J* = 7.6, 6.4, 1.5 Hz, 3H), 7.28 – 7.22 (m, 1H), 7.20 – 7.15 (m, 2H), 5.84 (s, 1H), 5.63 (q, *J* = 6.8 Hz, 1H), 4.17 (t, *J* = 5.8 Hz, 2H), 2.36 (s, 3H), 2.25 (q, *J* = 7.5 Hz, 2H), 2.13 (s, 3H), 2.12 – 2.08 (m, 3H), 1.73 (d, *J* = 6.8 Hz, 3H), 0.93 (t, *J* = 7.5 Hz, 3H). <sup>13</sup>C NMR (101 MHz, Chloroform-*d*) δ 164.42, 163.84, 151.11, 143.98, 142.50, 141.39, 140.25, 128.69 (2C), 127.62, 125.90 (2C), 122.03, 121.97, 110.03, 107.47, 58.12, 35.10, 29.76, 21.20, 19.41, 18.48, 10.86, 9.10. HRMS *m/z* calculated for C<sub>24</sub>H<sub>29</sub>N<sub>5</sub>NaO<sub>3</sub> [M + Na]<sup>+</sup> 458.2168, found 458.2169. *t*<sub>R</sub> (HPLC) = 1.99 min; Purity > 99%.

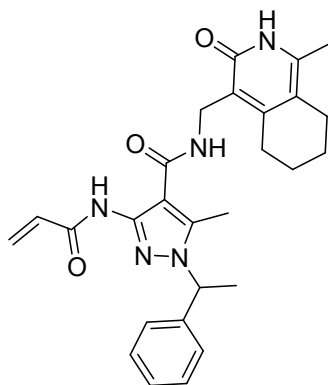

**b5**

**3-acrylamido-5-methyl-*N*-((1-methyl-3-oxo-2,3,5,6,7,8-hexahydroisoquinolin-4-yl)methyl)-1-(1-phenylethyl)-1*H*-pyrazole-4-carboxamide (**b5**)**. Light yellow solid 21 mg, yield: 24.6%. <sup>1</sup>H NMR (400 MHz, Chloroform-*d*) δ 12.22 (s, 1H), 11.25 (s, 1H), 9.74 (s, 1H), 7.28 (d, *J* = 8.8 Hz, 3H), 7.19 (d, *J* = 7.5 Hz, 2H), 6.39 (s, 1H), 5.68 (dd, *J* = 8.5, 3.5 Hz, 1H), 5.42 (q, *J* = 7.0 Hz, 1H), 4.49 (d, *J* = 5.2 Hz, 2H), 2.61 (s, 3H), 2.42 (t, *J* = 6.2 Hz, 4H), 2.15 (s, 3H), 1.89 (d, *J* = 6.9 Hz, 3H), 1.77 – 1.66 (m, 2H), 1.61 (d, *J* = 9.6 Hz, 2H). <sup>13</sup>C NMR (101 MHz, Chloroform-*d*) δ 164.00, 162.66, 161.27, 151.76, 144.30, 141.41, 140.12, 130.77, 128.70 (2C), 127.63, 125.96 (2C), 121.34, 115.16, 58.28, 34.68, 27.18, 24.92, 22.12, 22.05, 21.26, 16.44, 10.91. HRMS *m/z* calculated for C<sub>27</sub>H<sub>31</sub>N<sub>5</sub>NaO<sub>3</sub> [M + Na]<sup>+</sup> 496.2325, found 496.2327. *t*<sub>R</sub> (HPLC) = 2.14 min; Purity > 95%.

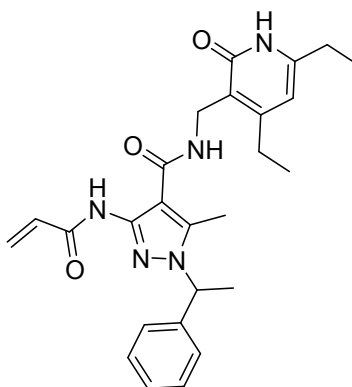

**b6**

**3-acrylamido-*N*-((4,6-diethyl-2-oxo-1,2-dihydropyridin-3-yl)methyl)-5-methyl-1-(1-phenylethyl)-1*H*-pyrazole-4-carboxamide (**b6**)**. Light yellow solid 31 mg, yield: 29.3%. <sup>1</sup>H NMR (400 MHz, Chloroform-*d*) δ 11.91 (s, 1H), 9.77 (s, 1H), 7.41 (s, 1H), 7.31 – 7.25 (m, 2H), 7.23 (d, *J* = 7.2 Hz, 1H), 7.18 – 7.13 (m, 2H), 6.41 – 6.30 (m, 1H), 5.96 (s, 1H), 5.72 – 5.56 (m, 1H), 5.41 (q, *J* = 6.9 Hz, 1H), 4.49 – 4.41 (m, 2H), 2.68 (q, *J* = 7.8 Hz, 2H), 2.50 (q, *J* = 7.6 Hz, 2H), 2.33 (s, 3H), 1.89 (d, *J* = 7.1 Hz, 3H), 1.20 (q, *J* = 7.5 Hz, 6H). <sup>13</sup>C NMR (101 MHz, Chloroform-*d*) δ 165.35, 163.78, 163.13, 156.15, 148.71, 145.16, 141.57, 138.46, 131.15, 129.91, 128.74 (2C), 127.63, 126.00 (2C), 121.43, 106.50, 106.36, 58.34, 34.97, 26.42, 26.08, 21.49, 14.58, 12.68, 11.15. HRMS *m/z* calculated for C<sub>26</sub>H<sub>31</sub>N<sub>5</sub>NaO<sub>3</sub> [M + Na]<sup>+</sup> 484.2325, found 484.2328. *t*<sub>R</sub> (HPLC) = 2.20 min; Purity > 98%.

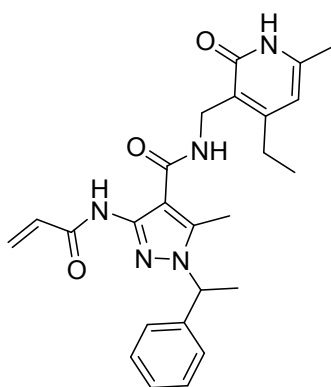

**b7**

**3-acrylamido-N-((4-ethyl-6-methyl-2-oxo-1,2-dihydropyridin-3-yl)methyl)-5-methyl-1-(1-phenylethyl)-1H-pyrazole-4-carboxamide (b7).** Light yellow solid 23 mg, yield: 22.1%. <sup>1</sup>H NMR (400 MHz, DMSO-*d*<sub>6</sub>) δ 11.42 (s, 1H), 10.09 (s, 1H), 7.40 (s, 1H), 7.35 – 7.30 (m, 2H), 7.28 – 7.24 (m, 1H), 7.21 – 7.17 (m, 2H), 6.32 (dd, *J* = 17.1, 10.2 Hz, 1H), 6.05 (d, *J* = 17.2 Hz, 1H), 5.84 (s, 1H), 5.63 (dd, *J* = 4.4, 2.5 Hz, 1H), 4.16 (dd, *J* = 5.0, 1.9 Hz, 2H), 2.44 (q, *J* = 7.6 Hz, 2H), 2.35 (s, 3H), 2.14 – 2.08 (m, 3H), 1.74 (d, *J* = 6.8 Hz, 3H), 1.05 (t, *J* = 7.6 Hz, 3H). <sup>13</sup>C NMR (101 MHz, Chloroform-*d*) δ 165.25, 163.74, 160.68, 156.20, 145.03, 144.96, 143.10, 141.53, 138.80, 131.08, 128.74 (2C), 127.64, 126.00 (2C), 121.23, 108.14, 106.46, 58.28, 34.89, 26.25, 21.47, 18.76, 14.48, 11.13. HRMS *m/z* calculated for C<sub>25</sub>H<sub>29</sub>N<sub>5</sub>NaO<sub>3</sub> [M + Na]<sup>+</sup> 470.2168, found 470.2168. *t*<sub>R</sub> (HPLC) = 2.06 min; Purity > 99%.

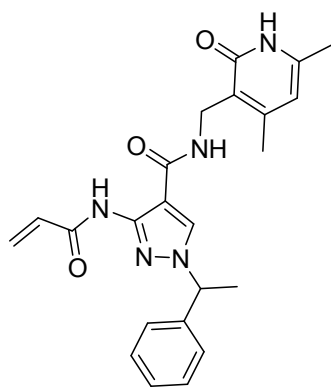

**b8**

**3-acrylamido-N-((4,6-dimethyl-2-oxo-1,2-dihydropyridin-3-yl)methyl)-1-(1-phenylethyl)-1H-pyrazole-4-carboxamide (b8).** Light yellow solid 26 mg, yield: 20.4%. <sup>1</sup>H NMR (400 MHz, Chloroform-*d*) δ 12.00 (s, 1H), 10.23 (s, 1H), 7.82 (s, 1H), 7.57 (t, *J* = 5.5 Hz, 1H), 7.19 (dd, *J* = 5.5, 1.9 Hz, 3H), 7.11 (dd, *J* = 7.0, 2.7 Hz, 2H), 6.39 (d, *J* = 16.4 Hz, 1H), 5.90 (s, 1H), 5.76 – 5.64 (m, 1H), 5.40 (d, *J* = 7.0 Hz, 1H), 4.42 (d, *J* = 5.4 Hz, 2H), 2.30 (s, 3H), 2.16 (s, 3H), 1.69 (d, *J* = 7.0 Hz, 3H). <sup>13</sup>C NMR (101 MHz, Chloroform-*d*) δ 164.91, 164.06, 161.78, 151.96, 147.55, 143.27, 140.72, 131.39, 128.59 (2C), 128.25, 127.88, 127.60, 126.52 (2C), 121.40, 110.10, 103.70, 61.54, 34.77, 21.17, 19.63, 18.57. HRMS *m/z* calculated for C<sub>23</sub>H<sub>25</sub>N<sub>5</sub>NaO<sub>3</sub> [M + Na]<sup>+</sup> 442.1855, found 442.1851. *t*<sub>R</sub> (HPLC) = 1.98 min; Purity > 99%.

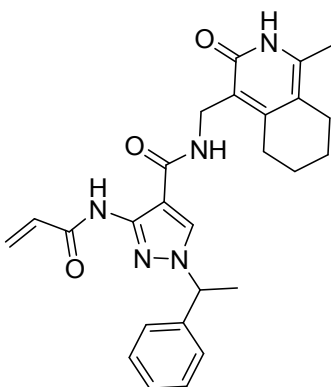

**b9**

**3-acrylamido-N-((1-methyl-3-oxo-2,3,5,6,7,8-hexahydroisoquinolin-4-yl)methyl)-1-(1-phenylethyl)-1H-pyrazole-4-carboxamide (b9).** Light yellow solid 19 mg, yield: 18.9%. <sup>1</sup>H NMR (400 MHz, DMSO-*d*<sub>6</sub>) δ 11.47 (s, 1H), 10.17 (s, 1H), 8.35 (s, 1H),



7.71 (s, 1H), 7.34 (dd,  $J = 8.1, 6.4$  Hz, 2H), 7.30 – 7.27 (m, 1H), 7.26 – 7.22 (m, 2H), 6.14 (d,  $J = 16.9$  Hz, 1H), 5.72 (dd,  $J = 10.2, 1.9$  Hz, 1H), 5.52 (d,  $J = 7.0$  Hz, 1H), 4.23 (d,  $J = 4.3$  Hz, 2H), 2.65 (d,  $J = 6.6$  Hz, 2H), 2.35 (d,  $J = 6.2$  Hz, 2H), 2.10 (s, 3H), 1.76 (d,  $J = 7.1$  Hz, 3H), 1.61 (t,  $J = 3.6$  Hz, 4H).  $^{13}\text{C}$  NMR (101 MHz, Chloroform- $d$ )  $\delta$  163.65, 162.92, 162.44, 152.41, 147.20, 147.11, 140.71, 140.46, 131.12, 128.67 (2C), 128.01, 127.73, 126.55 (2C), 121.21, 115.51, 104.44, 61.54, 34.23, 27.27, 24.88, 22.12, 22.05, 20.97, 16.45. HRMS  $m/z$  calculated for  $\text{C}_{26}\text{H}_{29}\text{N}_5\text{NaO}_3$  [ $\text{M} + \text{Na}$ ] $^+$  470.2168, found 482.2170.  $t_{\text{R}}$  (HPLC) = 2.18 min; Purity > 99%.

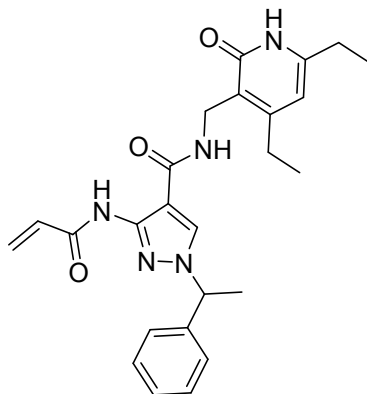

**b10**

**3-acrylamido-*N*-((4,6-diethyl-2-oxo-1,2-dihydropyridin-3-yl)methyl)-1-(1-phenylethyl)-1*H*-pyrazole-4-carboxamide (b10).**

Light yellow solid 30 mg, yield: 27.8%.  $^1\text{H}$  NMR (400 MHz, DMSO- $d_6$ )  $\delta$  11.45 (s, 1H), 10.17 (s, 1H), 8.37 (s, 1H), 7.82 (s, 1H), 7.34 (ddd,  $J = 7.7, 6.2, 1.6$  Hz, 2H), 7.31 – 7.27 (m, 1H), 7.26 – 7.21 (m, 2H), 6.15 (d,  $J = 17.0$  Hz, 1H), 5.90 (s, 1H), 5.72 (dd,  $J = 10.2, 1.9$  Hz, 1H), 5.52 (q,  $J = 7.0$  Hz, 1H), 4.22 (d,  $J = 4.8$  Hz, 2H), 2.47 (q,  $J = 7.6$  Hz, 2H), 2.41 (q,  $J = 7.6$  Hz, 2H), 1.76 (d,  $J = 7.1$  Hz, 3H), 1.13 (t,  $J = 7.5$  Hz, 3H), 1.07 (t,  $J = 7.6$  Hz, 3H).  $^{13}\text{C}$  NMR (101 MHz, Chloroform- $d$ )  $\delta$  165.23, 163.78, 162.04, 157.14, 148.92, 147.56, 140.60, 131.38, 128.65 (2C), 127.97, 127.58, 127.44, 126.57 (2C), 121.03, 106.66, 103.98, 61.56, 34.50, 26.40, 26.10, 21.17, 14.53, 12.62. HRMS  $m/z$  calculated for  $\text{C}_{25}\text{H}_{29}\text{N}_5\text{NaO}_3$  [ $\text{M} + \text{Na}$ ] $^+$  470.2168, found 470.2171.  $t_{\text{R}}$  (HPLC) = 2.22 min; Purity > 99%.

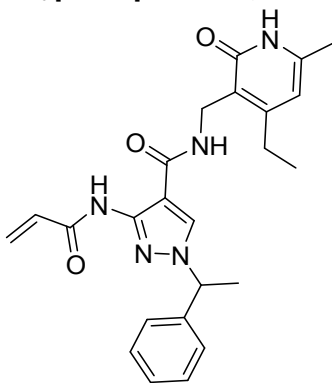

**b11**

**3-acrylamido-*N*-((4-ethyl-6-methyl-2-oxo-1,2-dihydropyridin-3-yl)methyl)-1-(1-phenylethyl)-1*H*-pyrazole-4-carboxamide (b11).**

Light yellow solid 25 mg, yield: 21.6%.  $^1\text{H}$  NMR (400 MHz, DMSO- $d_6$ )  $\delta$  11.46 (s, 1H), 10.16 (s, 1H), 8.36 (s, 1H), 7.80 (s, 1H), 7.34 (dd,  $J = 8.1, 6.5$  Hz, 2H), 7.29 (d,  $J = 6.9$  Hz, 1H), 7.26 – 7.21 (m, 2H), 6.15 (d,  $J = 16.9$  Hz, 1H), 5.88 (s, 1H), 5.72 (dd,  $J = 10.1, 1.9$  Hz, 1H), 5.52 (q,  $J = 7.0$  Hz, 1H), 4.22 (d,  $J = 5.0$  Hz, 2H), 2.49 – 2.44 (m, 2H), 2.12 (s, 3H), 1.76 (d,  $J = 7.0$  Hz, 3H), 1.06 (t,  $J = 7.5$  Hz, 3H).  $^{13}\text{C}$  NMR (101 MHz, Chloroform- $d$ )  $\delta$  165.13, 163.91, 161.82, 157.25, 147.52, 143.76, 140.76, 131.41, 128.60, 128.54 (2C), 127.82, 127.45, 126.44 (2C), 120.54, 108.20, 103.80, 61.50, 34.33, 26.21, 21.18, 18.67, 14.44. HRMS  $m/z$  calculated for  $\text{C}_{24}\text{H}_{27}\text{N}_5\text{NaO}_3$  [ $\text{M} + \text{Na}$ ] $^+$  456.2012, found 456.2008.  $t_{\text{R}}$  (HPLC) = 2.08 min; Purity > 95%.

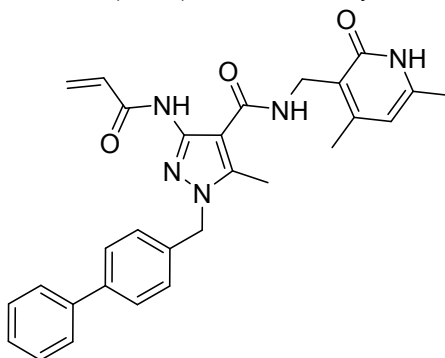

**b12**

**1-([1,1'-biphenyl]-4-ylmethyl)-3-acrylamido-*N*-((4,6-dimethyl-2-oxo-1,2-dihydropyridin-3-yl)methyl)-5-methyl-1*H*-pyrazole-4-carboxamide (b12).** Light yellow solid 34 mg, yield: 30.2%.  $^1\text{H}$  NMR (400 MHz, Chloroform- $d$ )  $\delta$  10.11 (s, 1H), 7.52 (dd,  $J = 11.4,$

7.9 Hz, 4H), 7.42 (t,  $J = 7.5$  Hz, 3H), 7.34 (d,  $J = 7.2$  Hz, 1H), 7.20 (d,  $J = 7.9$  Hz, 2H), 6.40 (s, 1H), 5.89 (s, 1H), 5.77 – 5.64 (m, 1H), 5.32 (d,  $J = 19.2$  Hz, 3H), 4.46 (d,  $J = 5.8$  Hz, 2H), 2.41 (s, 3H), 2.34 (s, 3H), 2.19 (s, 3H). HRMS  $m/z$  calculated for  $C_{29}H_{29}N_5NaO_3$  [ $M + Na$ ] $^+$  518.2168, found 518.2164.  $t_R$  (HPLC) = 2.23 min; Purity > 95%.

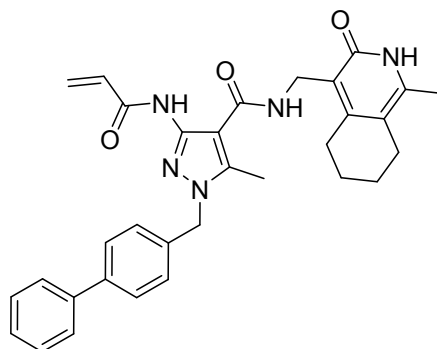

**b13**

**1-([1,1'-biphenyl]-4-ylmethyl)-3-acrylamido-5-methyl-N-((1-methyl-3-oxo-2,3,5,6,7,8-hexahydroisoquinolin-4-yl)methyl)-1H-pyrazole-4-carboxamide (b13)**. Light yellow solid 27 mg, yield: 24.1%.  $^1H$  NMR (400 MHz,  $DMSO-d_6$ )  $\delta$  11.43 (s, 1H), 10.06 (s, 1H), 7.63 (d,  $J = 7.9$  Hz, 4H), 7.45 (t,  $J = 7.6$  Hz, 2H), 7.37 (d,  $J = 7.4$  Hz, 1H), 7.34 (s, 1H), 7.25 (d,  $J = 8.0$  Hz, 2H), 6.30 (dd,  $J = 17.0, 10.3$  Hz, 1H), 6.03 (d,  $J = 17.1$  Hz, 1H), 5.64 (dd,  $J = 10.2, 1.9$  Hz, 1H), 5.31 (s, 2H), 4.19 (d,  $J = 5.0$  Hz, 2H), 2.62 (d,  $J = 6.2$  Hz, 2H), 2.43 (s, 3H), 2.33 (d,  $J = 6.3$  Hz, 2H), 2.08 (s, 3H), 1.61 (q,  $J = 4.0, 3.4$  Hz, 4H).  $^{13}C$  NMR (101 MHz,  $DMSO-d_6$ )  $\delta$  165.62, 162.57, 161.96, 150.13, 142.43, 141.99, 140.85, 140.18, 140.01, 136.32, 130.93, 129.40 (2C), 128.29 (2C), 127.98, 127.62, 127.43 (2C), 127.14 (2C), 121.23, 112.07, 111.34, 52.05, 34.58, 26.90, 24.60, 22.56, 22.39, 16.39, 10.92. HRMS  $m/z$  calculated for  $C_{32}H_{33}N_5NaO_3$  [ $M + Na$ ] $^+$  558.2481, found 558.2487.  $t_R$  (HPLC) = 2.54 min; Purity > 98%.

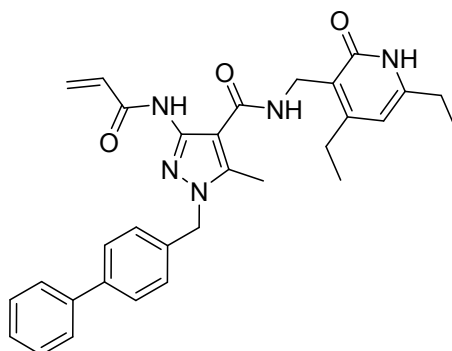

**b14**

**1-([1,1'-biphenyl]-4-ylmethyl)-3-acrylamido-N-((4,6-diethyl-2-oxo-1,2-dihydropyridin-3-yl)methyl)-5-methyl-1H-pyrazole-4-carboxamide (b14)**. Light yellow solid 28 mg, yield: 25.3%.  $^1H$  NMR (400 MHz,  $DMSO-d_6$ )  $\delta$  11.42 (s, 1H), 10.06 (s, 1H), 7.63 (d,  $J = 7.8$  Hz, 4H), 7.45 (t,  $J = 7.5$  Hz, 3H), 7.36 (t,  $J = 7.3$  Hz, 1H), 7.25 (d,  $J = 8.0$  Hz, 2H), 6.32 (dd,  $J = 17.1, 10.3$  Hz, 1H), 6.06 (d,  $J = 16.4$  Hz, 1H), 5.87 (s, 1H), 5.65 (dd,  $J = 10.3, 1.9$  Hz, 1H), 5.31 (s, 2H), 4.19 (d,  $J = 5.1$  Hz, 2H), 2.46 (d,  $J = 7.9$  Hz, 2H), 2.41 (d,  $J = 15.9$  Hz, 5H), 1.13 (t,  $J = 7.6$  Hz, 3H), 1.07 (t,  $J = 7.5$  Hz, 3H).  $^{13}C$  NMR (101 MHz, Chloroform- $d$ )  $\delta$  165.29, 163.96, 162.73, 156.02, 148.42, 140.80, 140.44, 135.05, 131.38, 128.81 (2C), 127.49 (2C), 127.48, 127.28 (2C), 127.01 (2C), 121.45, 106.66, 104.86, 53.11, 35.18, 26.51, 26.15, 14.64, 12.63, 11.54. HRMS  $m/z$  calculated for  $C_{31}H_{33}N_5NaO_3$  [ $M + Na$ ] $^+$  546.2481, found 546.2480.  $t_R$  (HPLC) = 2.63 min; Purity > 98%.

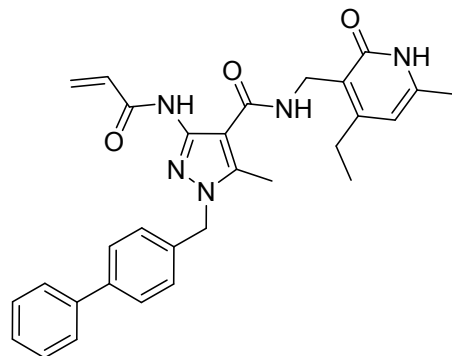

**b15**

**1-([1,1'-biphenyl]-4-ylmethyl)-3-acrylamido-N-((4-ethyl-6-methyl-2-oxo-1,2-dihydropyridin-3-yl)methyl)-5-methyl-1H-pyrazole-4-carboxamide (b15)**. Light yellow solid 29 mg, yield: 28.6%.  $^1H$  NMR (400 MHz,  $DMSO-d_6$ )  $\delta$  11.43 (s, 1H), 10.06 (s, 1H),

7.63 (d,  $J = 7.8$  Hz, 4H), 7.45 (t,  $J = 7.5$  Hz, 3H), 7.36 (t,  $J = 7.3$  Hz, 1H), 7.25 (d,  $J = 8.0$  Hz, 2H), 6.32 (dd,  $J = 17.2, 10.2$  Hz, 1H), 6.06 (d,  $J = 17.3$  Hz, 1H), 5.85 (s, 1H), 5.65 (dd,  $J = 10.2, 1.9$  Hz, 1H), 5.31 (s, 2H), 4.18 (d,  $J = 5.1$  Hz, 2H), 2.46 (m, 2H), 2.43 (s, 3H), 2.11 (s, 3H), 1.06 (t,  $J = 7.5$  Hz, 3H).  $^{13}\text{C}$  NMR (101 MHz, DMSO- $d_6$ )  $\delta$  165.58, 163.78, 162.46, 154.78, 143.59, 142.54, 142.02, 140.18, 140.01, 136.32, 131.06, 129.40 (2C), 128.28 (2C), 127.98, 127.56, 127.43 (2C), 127.13 (2C), 121.36, 119.64, 106.08, 52.04, 34.57, 25.84, 18.75, 14.72, 10.94. HRMS  $m/z$  calculated for  $\text{C}_{30}\text{H}_{31}\text{N}_5\text{NaO}_3$  [ $\text{M} + \text{Na}$ ] $^+$  532.2325, found 532.2327.  $t_R$  (HPLC) = 2.40 min; Purity > 97%.

The representative procedure for the preparation of pyrazole derivatives.

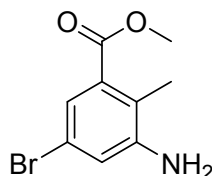

**12**

**methyl 3-amino-5-bromo-2-methylbenzoate (12).** methyl 5-bromo-2-methyl-3-nitrobenzoate (2 g, 7.30 mmol), ammonium chloride (1.95 g, 36.5 mmol) was added to a solution of methanol / water (18 ml / 6 ml). While the reaction solution was refluxing, iron powder (2.04 g, 36.5 mmol) was added, and the reaction was continued for 0.5 h. After the reaction was completed (monitored by TLC), added a layer of diatomaceous earth to filter the hot reaction liquid. The diatomaceous earth was washed twice with acetone and the filtrate was collected. The combined organic phase was dried over sodium sulfate, filtered and concentrated in vacuo to provide crude product. The crude product was purified by column chromatography eluting with EA/PE to afford target compound. Orange solid 1.62 g, yield: 90.9%.  $^1\text{H}$  NMR (400 MHz, DMSO- $d_6$ )  $\delta$  6.96 (d,  $J = 3.2$  Hz, 2H), 5.43 (s, 2H), 3.79 (s, 3H), 2.11 (s, 3H).

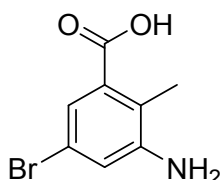

**13**

**3-amino-5-bromo-2-methylbenzoic acid (13).** Added 3-amino-5-bromo-2-methylbenzoic acid methyl ester (1.0 g, 4.13 mmol) and sodium hydroxide (0.49 g, 12.39 mmol) to the methanol / water mixed solution (20 ml / 20 ml), The reaction solution was reacted at 80 °C for 3 h. After completion (monitored by TLC), the reaction solution was concentrated under reduced pressure. Add water and ethyl acetate for extraction, adjust the pH to 3 ~ 4, and collect the organic phase. The combined organic layers were dried over anhydrous sodium sulphate, filtered and concentrated in vacuo to obtain the target compound 3-amino-5-bromo-2-methylbenzoic acid. Yellow brown solid 0.94 g, yield: 99.02%.  $^1\text{H}$  NMR (400 MHz, DMSO- $d_6$ )  $\delta$  12.90 (s, 1H), 6.95 (d,  $J = 2.2$  Hz, 1H), 6.94 (d,  $J = 2.2$  Hz, 1H), 5.38 (s, 2H), 2.13 (s, 3H).

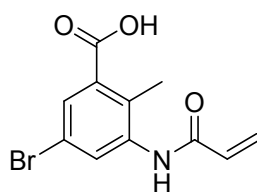

**14**

**3-acrylamido-5-bromo-2-methylbenzoic acid (14).** 3-amino-5-bromo-2-methylbenzoic acid (580 mg, 2.52 mmol) and potassium carbonate (1042.8 mg, 11.6 mmol) were added to tetrahydrofuran. Acryloyl chloride (407  $\mu\text{L}$ , 5.04 mmol) was added dropwise at 0 °C. The reaction solution was reacted at room temperature for 4 h. After completion (monitored by TLC), the reaction solution was concentrated under vacuum. Add water and ethyl acetate for extraction, adjust the pH to 3 ~ 4, collect the organic phase and concentrated under vacuum to afford a solid product. The crude product was purified by silica gel column chromatography to afford target compound. White solid 646 mg, yield: 90.34%.  $^1\text{H}$  NMR (400 MHz, DMSO- $d_6$ )  $\delta$  13.31 (s, 1H), 9.77 (s, 1H), 7.85 (d,  $J = 2.2$  Hz, 1H), 7.69 (d,  $J = 2.2$  Hz, 1H), 6.54 (dd,  $J = 17.0, 10.2$  Hz, 1H), 6.28 (dd,  $J = 17.1, 2.0$  Hz, 1H), 5.80 (dd,  $J = 10.2, 2.0$  Hz, 1H), 2.31 (s, 3H).

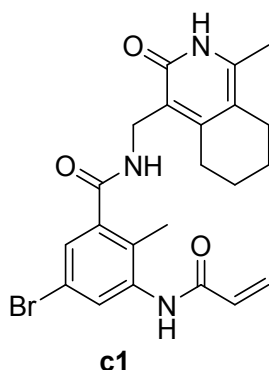

**3-acrylamido-5-bromo-2-methyl-N-((1-methyl-3-oxo-2,3,5,6,7,8-hexahydroisoquinolin-4-yl)methyl)benzamide (c1).** 3-acrylamido-5-bromo-2-methylbenzoic acid (160 mg, 0.56 mmol), 4-(aminomethyl)-1-methyl-5,6,7,8-tetrahydroisoquinoline-3 (2*H*)-one (216.55 mg, 1.13 mmol, obtained following the reference procedure<sup>[3]</sup>), 1-(3-dimethylaminopropyl)-3-ethylcarbodiimide hydrochloride (EDCI) (193.23 mg, 1.01 mmol), 1-hydroxy-7-azobenzotriazole (HOAT) (137.47 mg, 1.01 mmol), N-methylmorpholine (307.8  $\mu$ L, 2.8 mmol) was added to DMSO (5 ml) and reacted at room temperature overnight. After the reaction was completed, the reaction solution was poured into 10 ml of ice water, and a white solid precipitated, and the crude compound was obtained by filtration and drying. Using silica gel column chromatography to afford target compound. White solid 160 mg, yield: 62.3%. <sup>1</sup>H NMR (400 MHz, DMSO-*d*<sub>6</sub>)  $\delta$  11.49 (s, 1H), 9.61 (s, 1H), 8.31 (t, *J* = 4.7 Hz, 1H), 7.75 (d, *J* = 2.0 Hz, 1H), 7.19 (d, *J* = 2.2 Hz, 1H), 6.54 (dd, *J* = 17.1, 10.3 Hz, 1H), 6.26 (dd, *J* = 17.0, 2.0 Hz, 1H), 5.78 (dd, *J* = 10.2, 2.0 Hz, 1H), 4.28 (d, *J* = 4.8 Hz, 2H), 2.71 (s, 2H), 2.38 (s, 2H), 2.12 (s, 3H), 2.10 (s, 3H), 1.68-1.60 (m, 4H). HRMS *m/z* calculated for C<sub>22</sub>H<sub>24</sub>BrN<sub>3</sub>NaO<sub>3</sub> [*M* + Na]<sup>+</sup> 480.0899, found 480.0903. *t<sub>R</sub>* (HPLC) = 2.06 min; Purity > 95%.

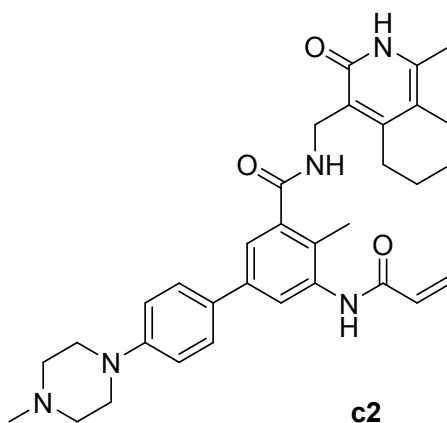

**5-acrylamido-4-methyl-N-((1-methyl-3-oxo-2,3,5,6,7,8-hexahydroisoquinolin-4-yl)methyl)-4'-(4-methylpiperazin-1-yl)-[1,1'-biphenyl]-3-carboxamide (c2).** To a stirred solution of **c1** (80 mg, 0.17 mmol) in a dioxane–water mixture (10 mL / 2 mL), 4-(4-Methyl-1-piperazinyl)benzene- boronic acid pinacol ester (79.12 mg, 0.26 mmol) was added, followed by the addition of Na<sub>2</sub>CO<sub>3</sub> (73.99 mg, 0.70 mmol). The solution was purged with argon for 15 min and then PdCl<sub>2</sub>(dppf)·CH<sub>2</sub>Cl<sub>2</sub> (12.43 mg, 0.017 mmol) was added and the solution was again purged with argon for an additional 10 min. The reaction mixture was stirred at 100 °C for 4 h. After completion (monitored by TLC), the reaction mixture was diluted with water and extracted with 5% MeOH/DCM. The combined organic layers were dried over anhydrous sodium sulphate, filtered and concentrated under reduced pressure. The crude compound was purified by column chromatography eluting with MeOH/DCM to afford the desired compound **c2**. Light yellow solid 36 mg, yield: 38.2%. <sup>1</sup>H NMR (400 MHz, DMSO-*d*<sub>6</sub>)  $\delta$  11.47 (s, 1H), 9.60 (s, 1H), 8.24 (t, *J* = 4.8 Hz, 1H), 7.68 (s, 1H), 7.49 (d, *J* = 8.6 Hz, 2H), 7.28 (d, *J* = 1.9 Hz, 1H), 7.00 (d, *J* = 8.7 Hz, 2H), 6.55 (dd, *J* = 16.9, 10.2 Hz, 1H), 6.25 (dd, *J* = 17.0, 2.0 Hz, 1H), 5.80 – 5.73 (m, 1H), 4.32 (d, *J* = 4.8 Hz, 2H), 3.18 (t, *J* = 5.1 Hz, 4H), 2.73 (s, 2H), 2.45 (t, *J* = 5.0 Hz, 4H), 2.38 (s, 2H), 2.22 (s, 3H), 2.17 (s, 3H), 2.10 (s, 3H), 1.64 (s, 4H). <sup>13</sup>C NMR (101 MHz, Chloroform-*d*)  $\delta$  170.32, 164.96, 162.72, 152.05, 150.43, 140.66, 138.68, 138.20, 136.48, 136.38, 130.71, 127.56, 127.39 (2C), 124.46, 124.37, 122.22, 120.88, 116.06 (2C), 115.17, 54.70 (2C), 48.47 (2C), 45.67, 35.38, 29.56, 27.30, 24.76, 22.12, 22.01, 16.32. HRMS *m/z* calculated for C<sub>33</sub>H<sub>39</sub>N<sub>5</sub>NaO<sub>3</sub> [*M* + Na]<sup>+</sup> 576.2951, found 576.2952. *t<sub>R</sub>* (HPLC) = 2.27 min; Purity > 98%.

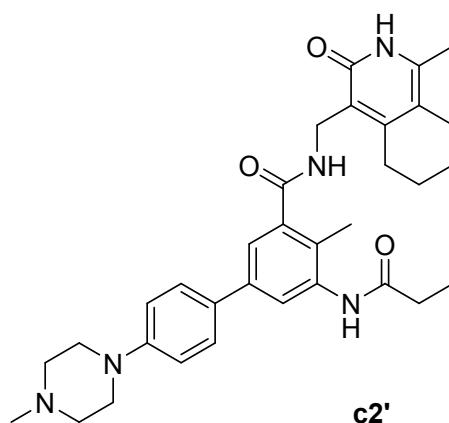

**4-methyl-N-((1-methyl-3-oxo-2,3,5,6,7,8-hexahydroisoquinolin-4-yl)methyl)-4'-(4-methylpiperazin-1-yl)-5-propionamido-[1,1'-biphenyl]-3-carboxamide (c2')**. Using propionyl chloride as raw material, a similar reaction step as compound **c2** is performed to obtain the target compound **c2'**. Grey solid 29 mg, yield: 20.01% ( the last step). <sup>1</sup>H NMR (400 MHz, DMSO-*d*<sub>6</sub>) δ 11.47 (s, 1H), 9.30 (s, 1H), 8.21 (t, *J* = 4.8 Hz, 1H), 7.58 (s, 1H), 7.47 (d, *J* = 8.6 Hz, 2H), 7.25 (d, *J* = 2.0 Hz, 1H), 7.00 (d, *J* = 8.9 Hz, 2H), 4.32 (d, *J* = 4.8 Hz, 2H), 3.17 (t, *J* = 4.9 Hz, 4H), 2.73 (s, 2H), 2.46 (t, *J* = 5.0 Hz, 4H), 2.36 (m, 4H), 2.23 (s, 3H), 2.15 (s, 3H), 2.10 (s, 3H), 1.65 (d, *J* = 3.8 Hz, 4H), 1.11 (t, *J* = 7.5 Hz, 3H). <sup>13</sup>C NMR (101 MHz, Chloroform-*d*) δ 177.89, 174.37, 166.72, 156.09, 154.33, 144.70, 142.65, 142.16, 140.58, 134.89, 131.59, 131.39 (2C), 128.54, 126.11, 124.88, 120.11 (2C), 119.20, 58.64 (2C), 52.41 (2C), 49.55, 39.37, 33.75, 33.56, 31.31, 28.77, 26.13, 26.02, 20.30, 18.05. HRMS *m/z* calculated for C<sub>33</sub>H<sub>41</sub>N<sub>5</sub>NaO<sub>3</sub> [M + Na]<sup>+</sup> 578.3107, found 578.3102. *t*<sub>R</sub> (HPLC) = 2.03 min; Purity > 95%.

## Experimental protocols of biological assays

### *In vitro* HMTs inhibition assay.

The enzyme levels of the histone methyltransferase panel were determined using the AlphaLISA immunodetection assay conducted using the enzyme profiler service provided by Shanghai ChemPartner (Shanghai, China). The values were further determined using an AlphaLISA methyltransferase assay kit (PerkinElmer, MA, USA) according to the manufacturer's protocol.

### SAM competition inhibition.

100 μL of SKLB-0335, SKLB-0335' or GSK126 solutions with different concentrations were added to the 384-well detection plate respectively. Two replicate wells were set for each compound concentration. Then add 5 μL of EZH2 enzyme solution (3 μM or 30 μM) to each well, centrifuge at 1000 rpm/min for 1 min and incubate for 15 min or 120 min. Add 5 μL of modified substrate, centrifuge at 1000 rpm / min for 1 min, and incubate at room temperature for 1 h. After the incubation, add 5 μL of acceptor magnetic beads to terminate the enzyme reaction. Similarly, centrifuge at 1000 rpm/min for 1 min, incubate at room temperature for 1 h, and finally add 10 μL of donor magnetic beads under dark conditions, centrifuge at 1000 rpm/min for 1 min, and incubate at room temperature for 30 min. EnSpire's Alpha mode is used to detect signal strength.

### K<sub>off</sub> test on EZH2.

The K<sub>off</sub> of SKLB-0335 was tested using the spin column method. Prepare Buffer, enzyme mix A (100x (Enzyme-20x IC<sub>50</sub> cpd. mix)), B (100x (Enzyme-DMSO mix)), preincubation 60 min, prepare substrate mix C (Substrate Mix-GL11 and <sup>3</sup>H-SAM) and min control. Take out spin column, flow by gravity, and spin 1300 rpm/min for 1 minute at 4 °C in bucket-swing centrifuge. Balance spin column with 0.7 mL 1x kinase buffer, spin the column 1300 rpm/min for 1 minute. Balance spin column with 0.5 mL 1x kinase buffer, spin the column 1300 rpm/min for 1 minute. Balance spin column with 0.4 mL 1x kinase buffer, spin the column 1300 rpm/min for 1 minute. Put the balanced spin column on new collection tubes. Add Pre-incubation A, B to spin column respectively, spin the column 1300 rpm/min for 1 minute, collect the liquid. Add 10 μL of solution to the prepare substrate mix. Add 10 μL 100x collected solution into 990 uL substrate mixture to initiate the assay. After different assay time (6min, 11min, 15min, 20min, 25min, 30min, 45min, 60min, 90min, 120min, 150min), taking out 20 μL assay product and add into 10 μL stop buffer to stop the assay. Transfer 25 μL of volume per well to Flashplate from assay plate. Incubate for 1 h minimum at room temperature. Wash Flashplate with dH<sub>2</sub>O + 0.1% Tween-20 three times. Read plate on Microbeta. Fit the data in GraphPad Prism version 6.0.

### Molecular modelling.

The 3D structure of the PRC2 complex was downloaded from the PDB (<http://www.rcsb.org/>, PDB code 5LS6). Docking of compounds to PRC2 were performed using AutoDock 4.2. Molecule SKLB-0335 was built with Bio<sup>X</sup> and optimized at molecular mechanical level. For SKLB-0335, the flexible side chain method was performed for covalent docking<sup>[4]</sup>. The receptor was modified to

remove side chain atoms of Cys663, and the side chain of Cys663 was tethered with the ligand and the C atom type was changed to Z. The C coordinates of Cys663 was used for covalent grid map generation with energy barrier height of 1000 and half-width of 5 Å.

## EZH2 Purification and Mass Spectrometry.

The EZH2 catalytic domain (AA 494-737) for the mass spectrometry assay was expressed in *E.coli* and purified. The molecular weight (MW) of proteins and adducts was recorded with the LC-MS. (Shanghai Sangon Co. Ltd.) The LC-MS method is shown in the table below:

| LC-MS system         | ACQUITY UPLC I Class & XevoG2-XS QTof                                   |                   |                   |
|----------------------|-------------------------------------------------------------------------|-------------------|-------------------|
| Column               | ACQUITY UPLC BEH300 C4 1.7um 2.1*50mm, Waters                           |                   |                   |
| Column temperature   | 80 °C                                                                   |                   |                   |
| Room temperature     | 10 °C                                                                   |                   |                   |
| Detection wavelength | 280 nm                                                                  |                   |                   |
| Mobile phase         | Phase A (0.1% Formic acid in Water), Phase B (0.1% FA in Acetonitrile). |                   |                   |
| Flow rate            | 0.3 mL/min                                                              |                   |                   |
| Volume               | 20ul                                                                    |                   |                   |
| Elution gradient     | Time(min)                                                               | Composition A (%) | Composition B (%) |
|                      | 0.00                                                                    | 95                | 5                 |
|                      | 1.00                                                                    | 95                | 5                 |
|                      | 7.00                                                                    | 10                | 90                |
|                      | 7.50                                                                    | 10                | 90                |
|                      | 7.60                                                                    | 95                | 5                 |
|                      | 8.00                                                                    | 10                | 90                |
|                      | 10.00                                                                   | 95                | 5                 |
| Detection method     | Positive ion, precursor ion scan range: 500-4000 m/z                    |                   |                   |

Data analysis: Unifi software was used to conduct deconvolution analysis on the original data to obtain accurate molecular weight values. TOF Resolution: 10000; Output range: 10000-50000.

## Cell culture.

SU-DHL-6 cell lines used in our study were purchased from the American Type Culture Collection (ATCC). The cells were maintained in DMEM or RPMI 1640 medium supplemented with 10% foetal bovine serum (FBS) and 1% Penicillin-Streptomycin under humidified conditions with 5% CO<sub>2</sub> at 37 °C.

## Western blotting analysis.

After treatment with a series of concentrations of SKLB-0335 for various days at 37 °C, cells were harvested, washed in ice-cold PBS, and lysed with RIPA buffer (Beyotime, China). And the protein concentrations were determined by the Bradford method. Proteins were separated by gel electrophoresis on 5 – 10% SDS-PAGE gels and probed with specific antibodies (Cell Signaling Technology, USA) including anti-H3K27me3, anti-EZH2, anti-H3 and anti-GAPDH. All of the antibodies were used at a 1 : 1000 dilution, and the horseradish peroxidase-coupled secondary antibodies (Zhong Shan Golden Bridge Bio-technology, China) were used at 1 : 5000.

## Wash-out experiment.

SU-DHL-6 cells were treated with SKLB-0335, SKLB-0335' or GSK126 at 10 μM for 6 days, then medium containing SKLB-0335, SKLB-0335' or GSK126 was subsequently removed, and eluent cells with fresh medium every 30 minutes for a total of 5 times to effectively 'wash-out' the compound, and cells were allowed to grow in the absence of SKLB-0335, SKLB-0335' or GSK126 for 1 – 4 days. Cells were collected and lysed for immunoblotting analysis at last.

## Real-time qPCR assay.

Cells were treated with different drugs for 5 days, and then total RNA was extracted with Trizol, according to the manufacturer's instruction. RNA was reverse-transcribed by PrimeScript™RT reagent Kit. RT-qPCR was carried out using the ChamQ Universal SYBR qPCR Master Mix on the CFX96 RT-qPCR system in accordance with the manufacturer's instruction. The reaction procedure was as follows: 95 °C for 30 s followed by 40 cycles of amplification for 5 s at 95 °C, 30 s at 60 °C. The primer sequences used for RT-qPCR are listed as follows.

| Gene  | Forward           | Reverse            |
|-------|-------------------|--------------------|
| GAPDH | CCTTCCGTGTCCCACT  | GCCTGCTTCACCACCTTC |
| CDX2  | AGAAGAGCCGCGAGGAG | GGGAGCAGACCTCACCAT |
| CCND2 | GTGGCCTTGGCATTCT  | ATCTATCGCTCGGGAACA |

|       |                    |                     |
|-------|--------------------|---------------------|
| BMP6  | TTCCCAGAAGTCCACAGG | GCACGAACATACAACAGCA |
| EOMES | GCGCATGTTTCCTTTCTT | ATGTTATTGTCGGCTTTGC |

## References

- [1] S. K. Verma, X. Tian, L. V. LaFrance, C. Duquenne, D. P. Suarez, K. A. Newlander, S. P. Romeril, J. L. Burgess, S. W. Grant, J. A. Brackley, A. P. Graves, D. A. Scherzer, A. Shu, C. Thompson, H. M. Ott, G. S. Aller, C. A. Machutta, E. Diaz, Y. Jiang, N. W. Johnson, S. D. Knight, R. G. Kruger, M. T. McCabe, D. Dhanak, P. J. Tummino, C. L. Creasy, W. H. Miller, *ACS Med. Chem. Lett.* **2012**, *3*, 1091-1096.
- [2] C. Li, Y. Zhang, Q. Sun, T. Gu, H. Peng, W. Tang, *J. Am. Chem. Soc.* **2016**, *138*, 10774-10777.
- [3] L. Zhang, X. Song, N. Wang, L. Zhao, Q. Feng, X. You, C. Peng, T. Gao, M. Xiong, B. He, C. Gao, Y. Luo, Y. Xu, Q. Zhang, L. Yu, *RSC Advances* **2015**, *5*, 25967-25978.
- [4] G. Bianco, S. Forli, D. S. Goodsell, A. J. Olson, *Protein Sci.* **2016**, *25*, 295-301.

# Spectral data

## The NMR and HRMS of representative compounds

Compound a1

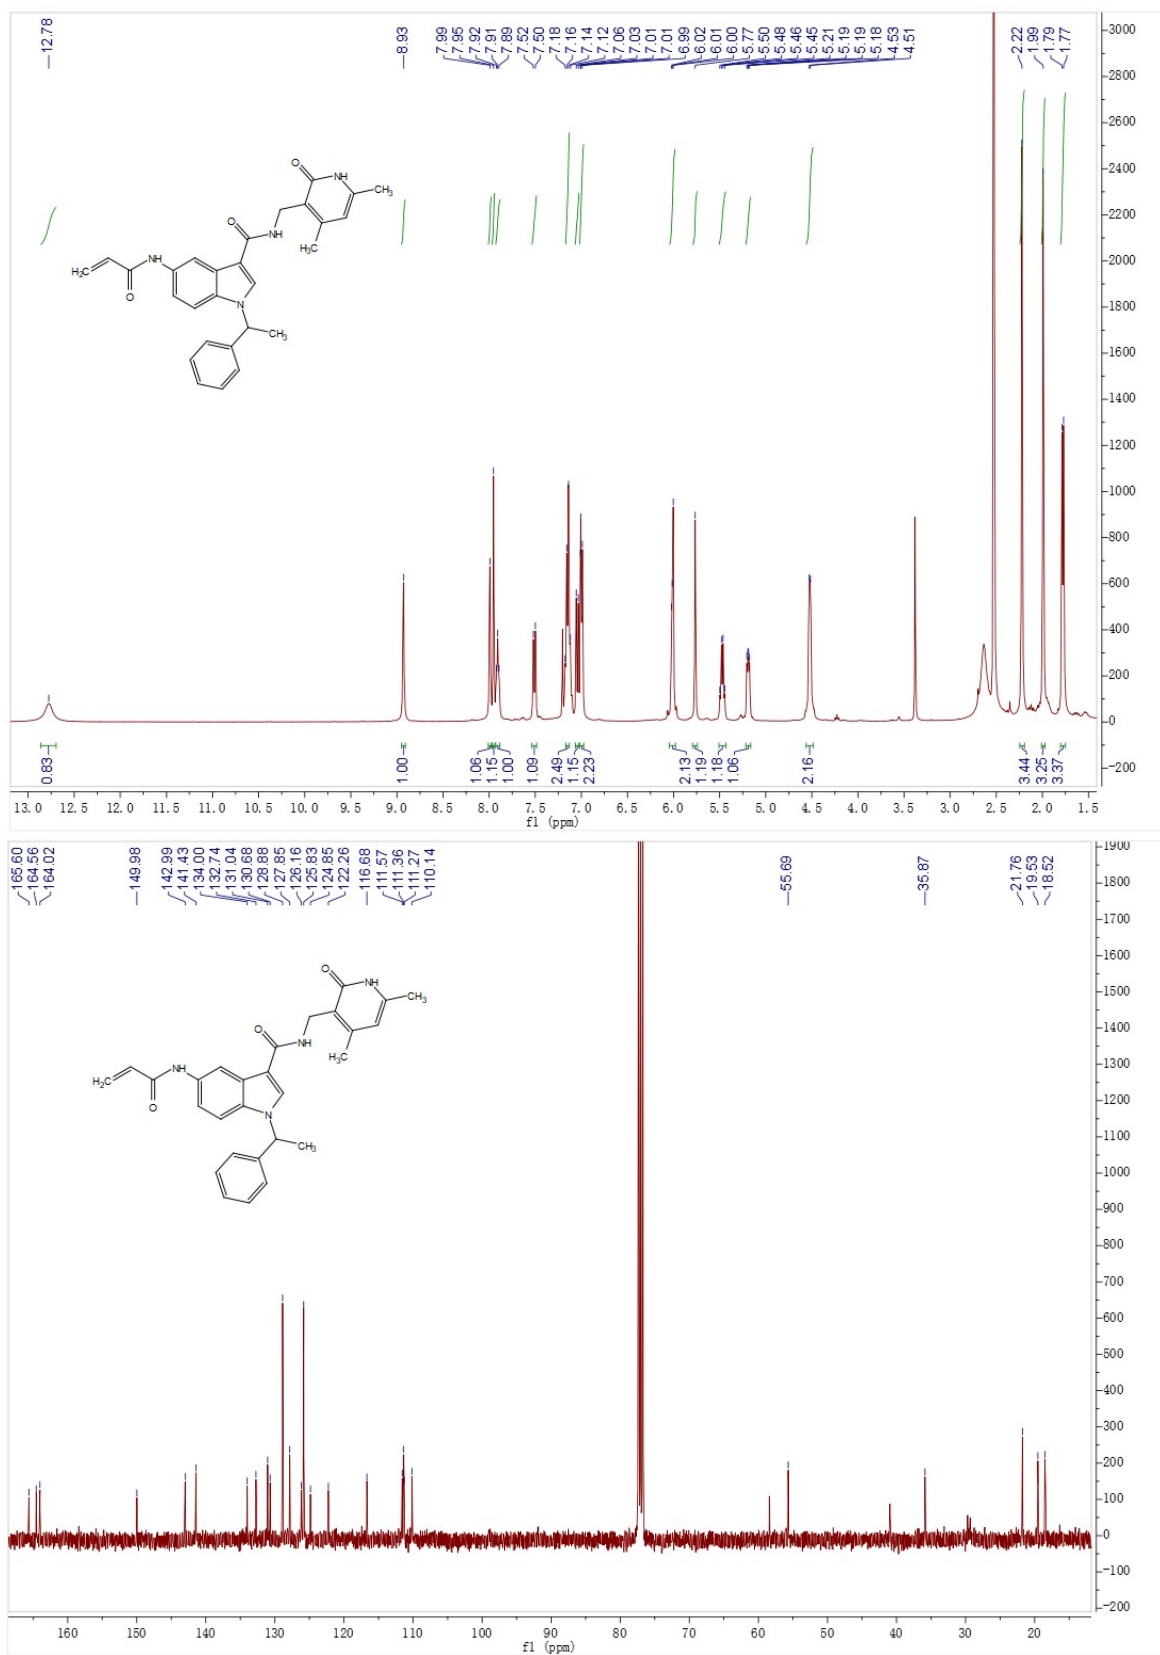



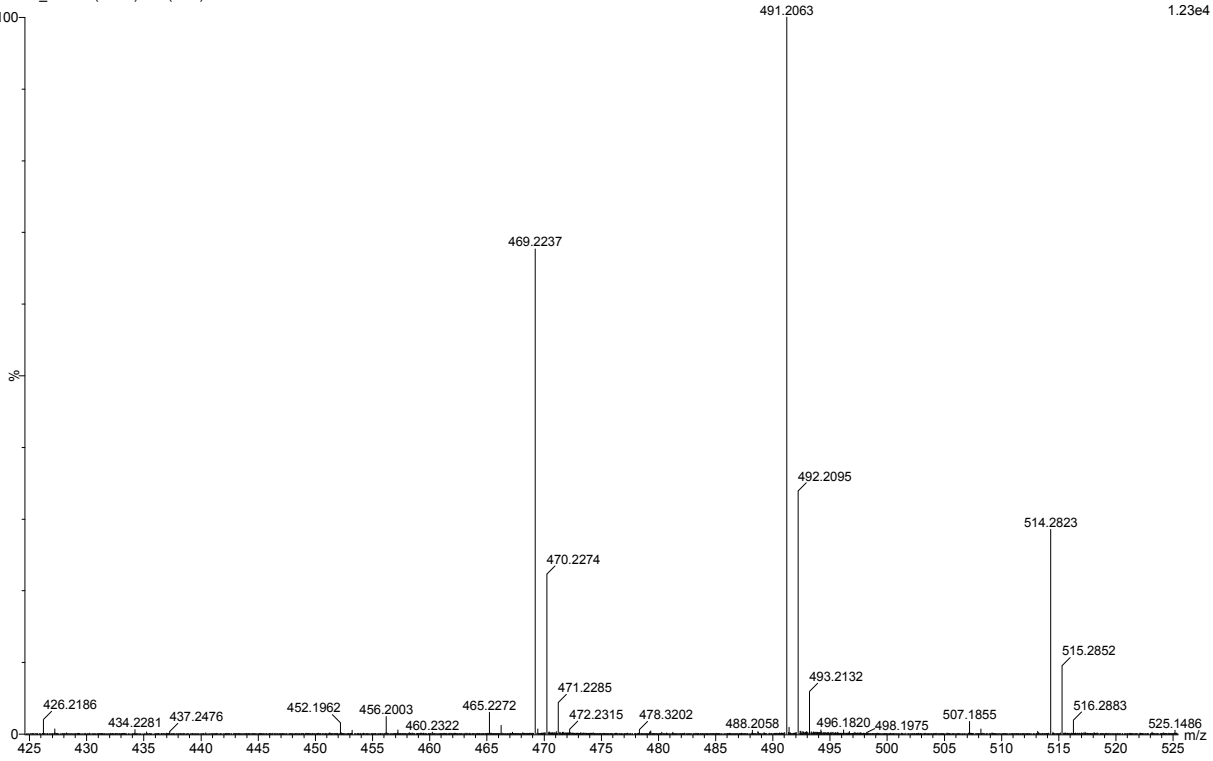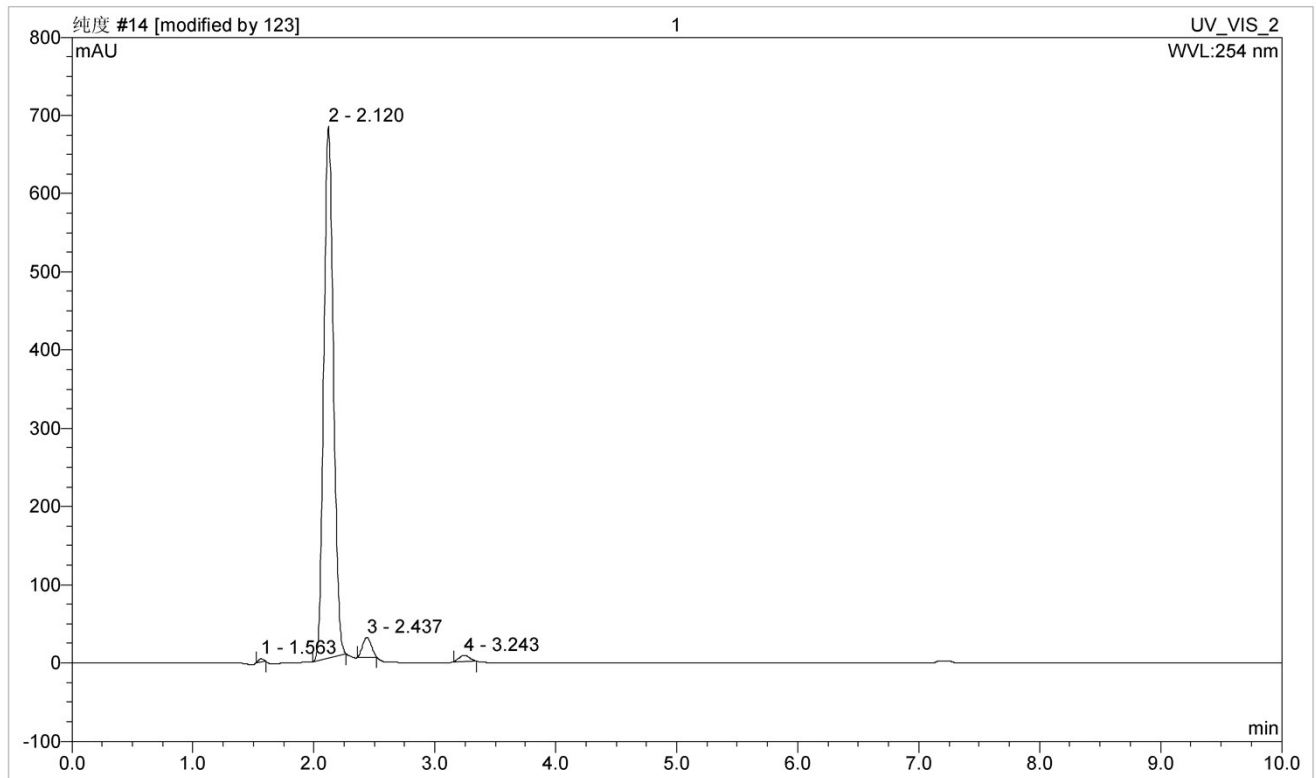

| No.           | Ret.Time min | Peak Name | Height mAU | Area mAU*min | Rel.Area % | Amount | Type |
|---------------|--------------|-----------|------------|--------------|------------|--------|------|
| 1             | 1.56         | n.a.      | 3.960      | 0.187        | 0.28       | n.a.   | BMB* |
| 2             | 2.12         | n.a.      | 679.395    | 62.940       | 95.29      | n.a.   | BMB* |
| 3             | 2.44         | n.a.      | 25.215     | 2.143        | 3.24       | n.a.   | BMB* |
| 4             | 3.24         | n.a.      | 7.898      | 0.783        | 1.19       | n.a.   | BMB* |
| <b>Total:</b> |              |           | 716.468    | 66.053       | 100.00     | 0.000  |      |

Compound **b1**

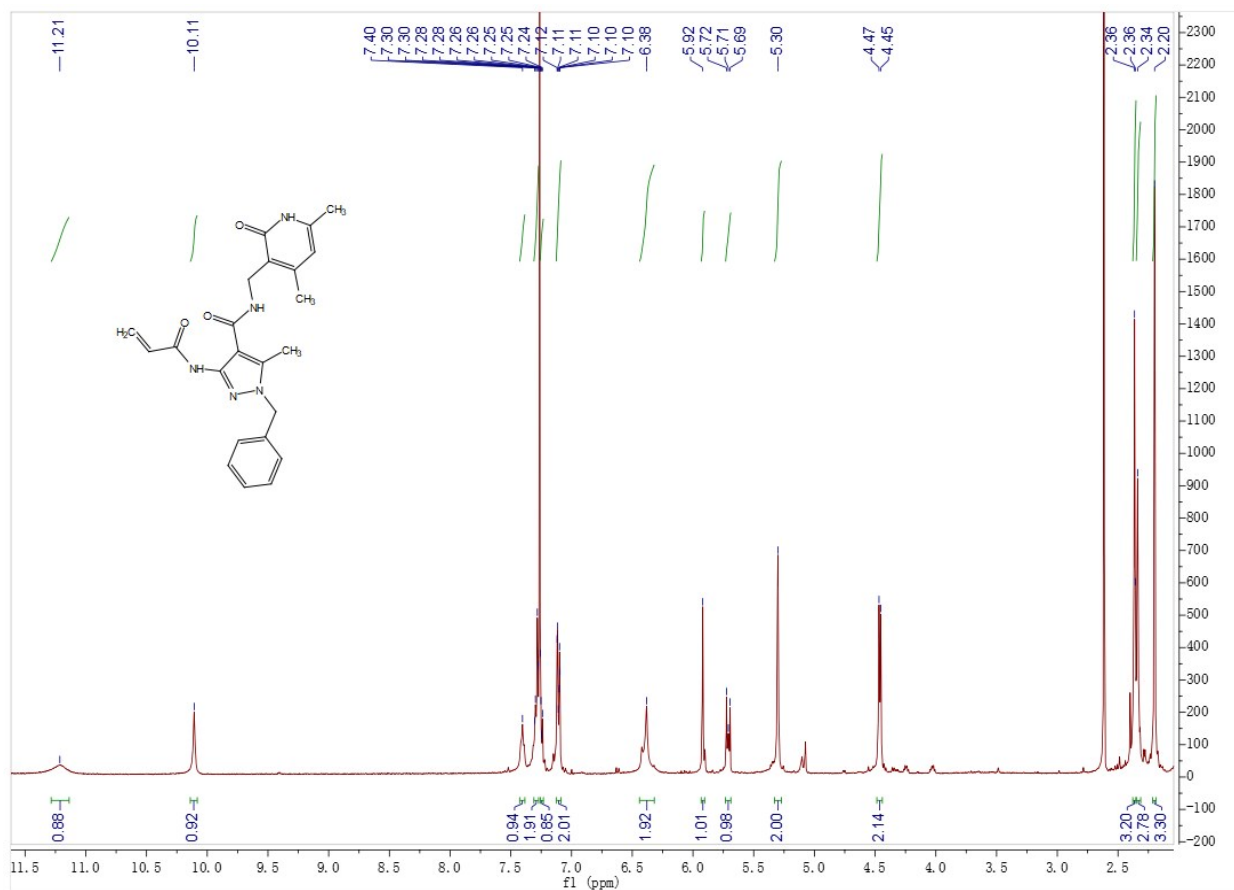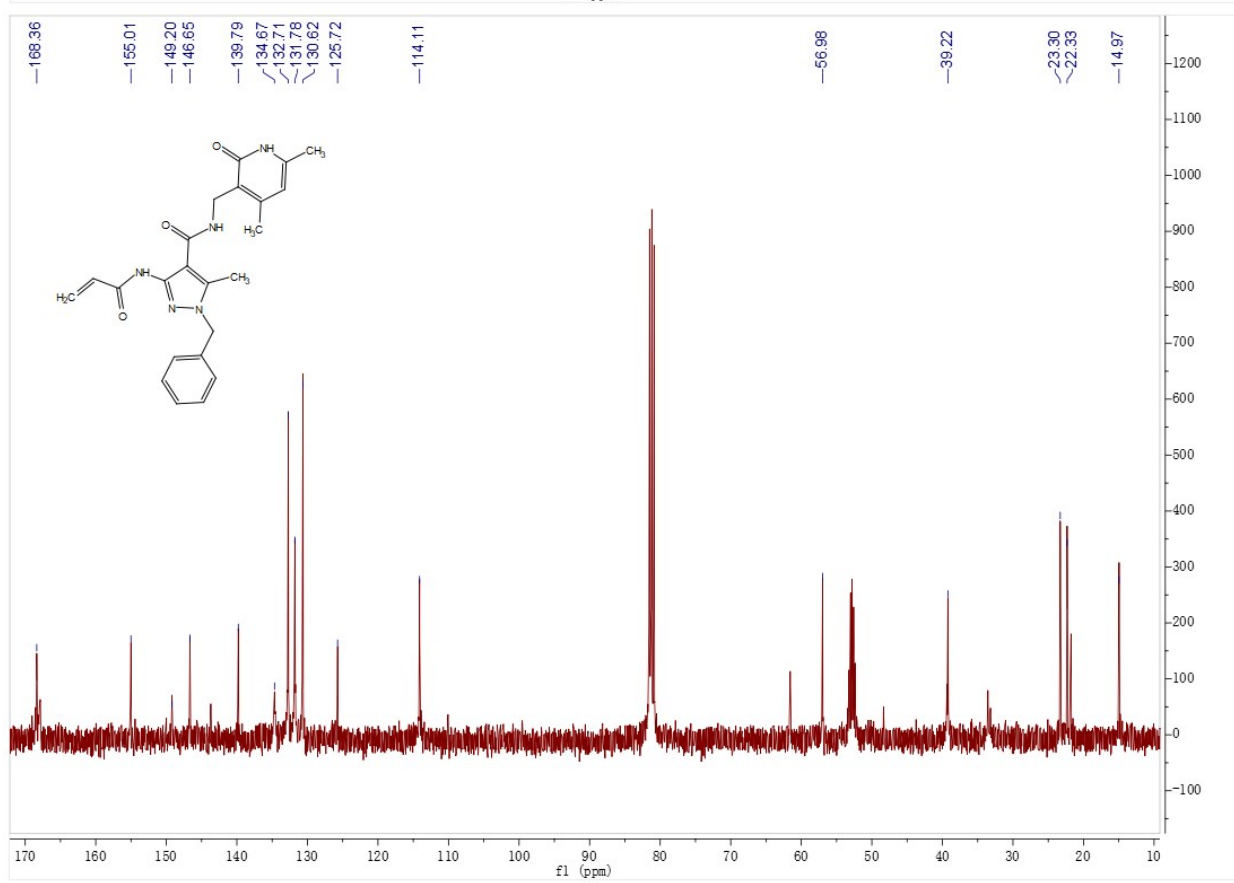

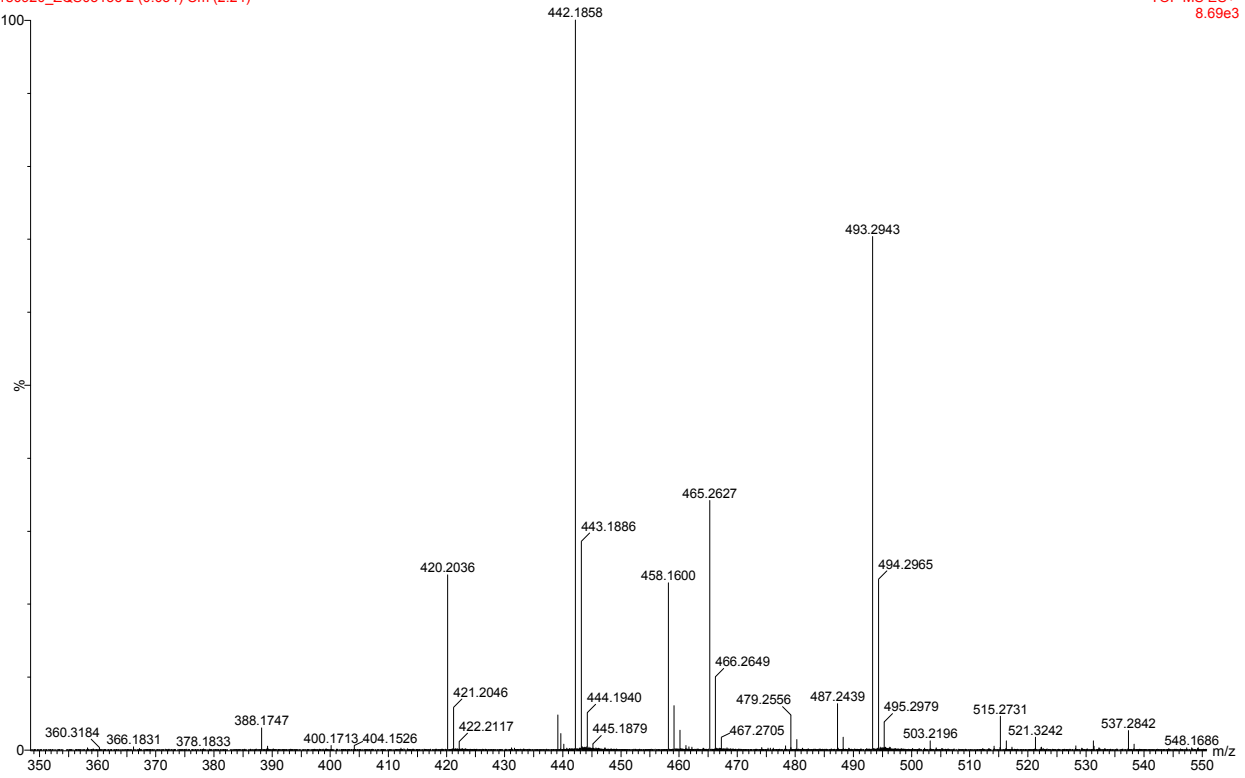

Compound b2

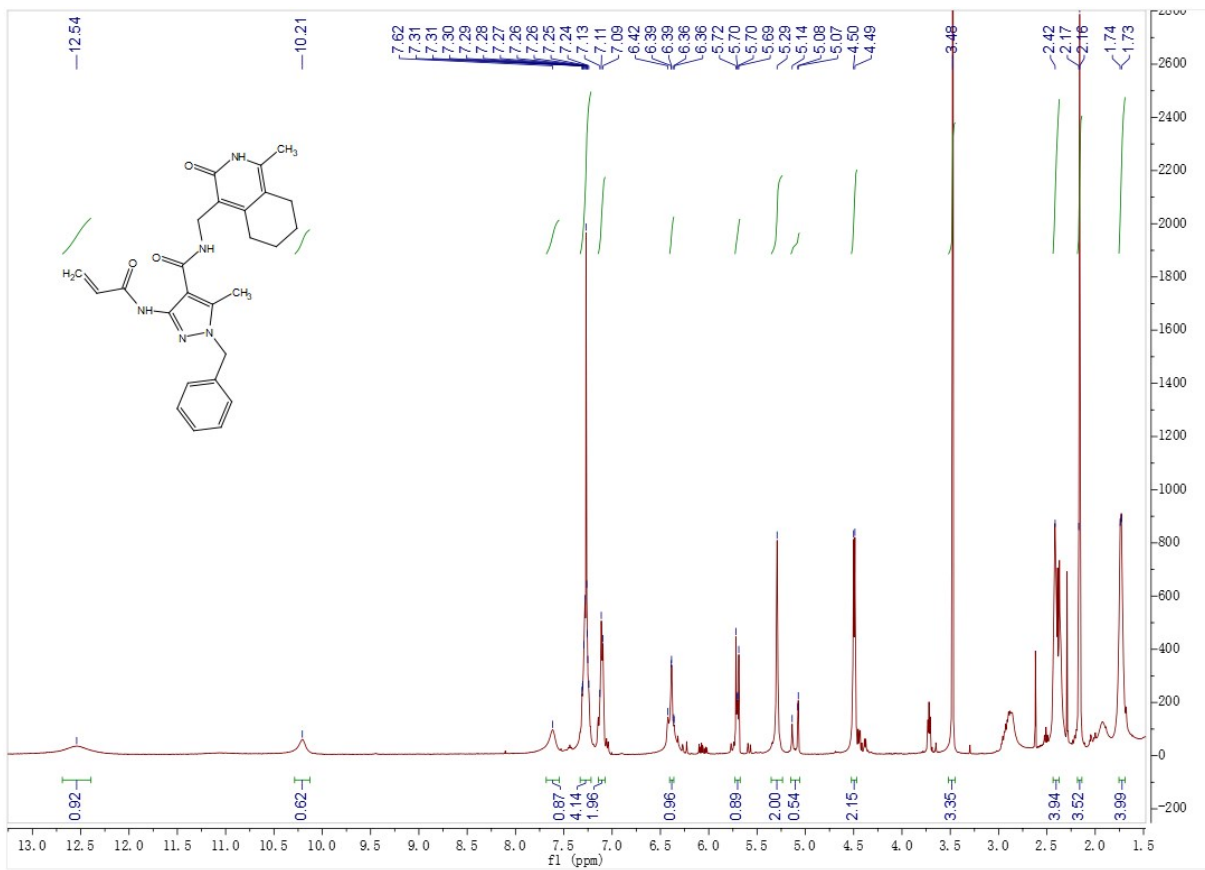

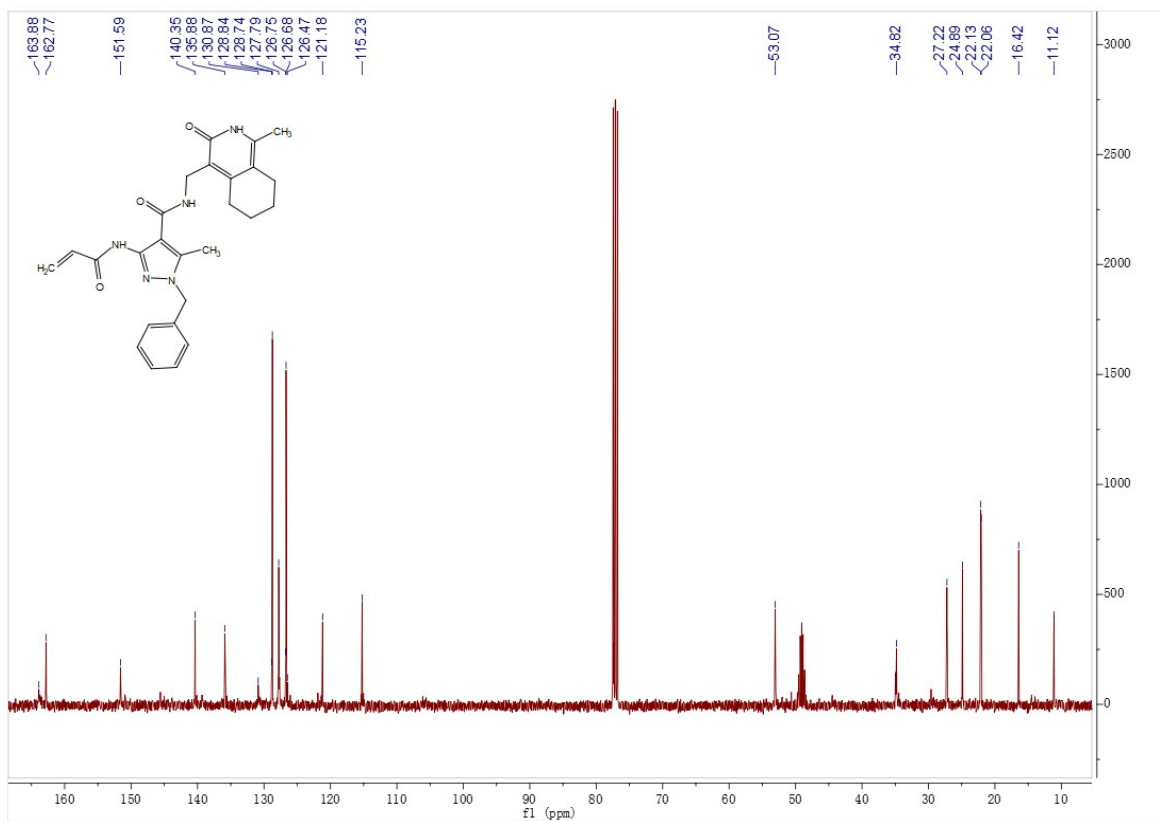

17:22:07  
180920\_ZQS03166 15 (0.257) Cm (3:24)

20-Sep-2018  
TOF MS ES+  
1.43e4

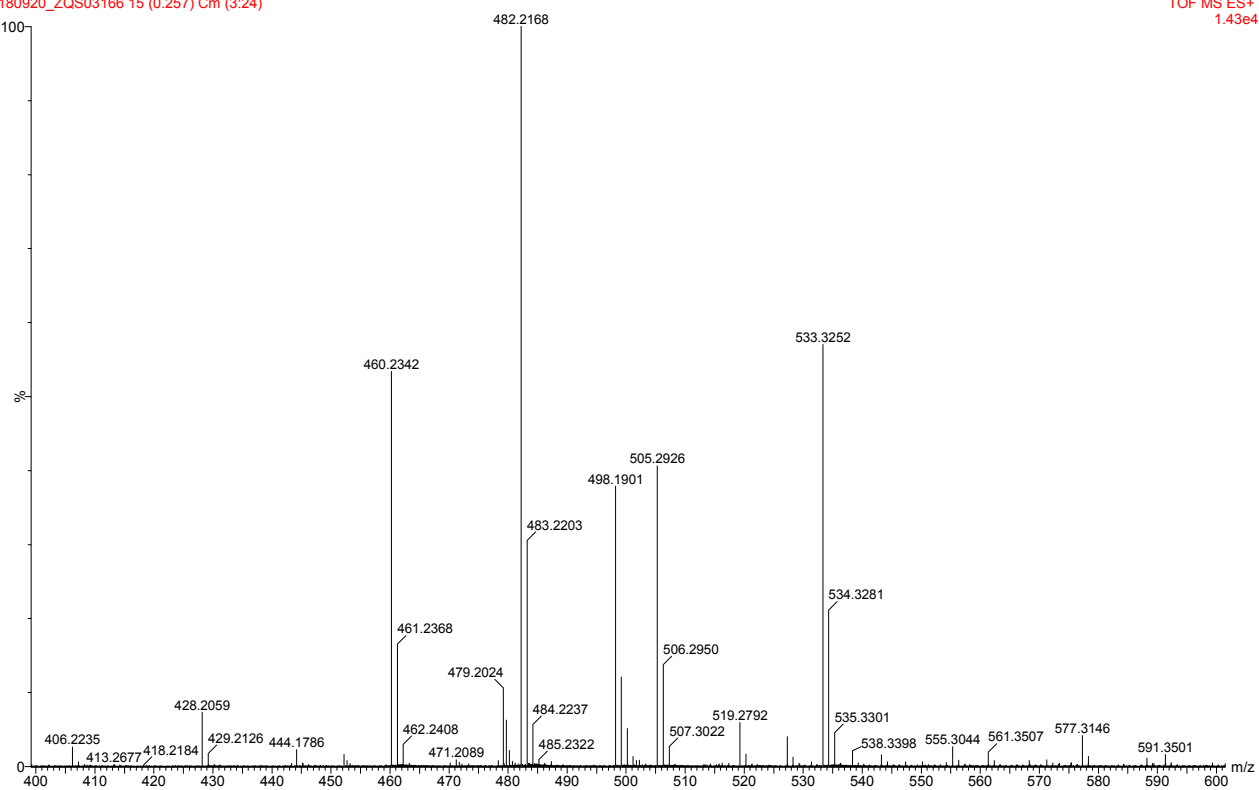

Compound **b3**

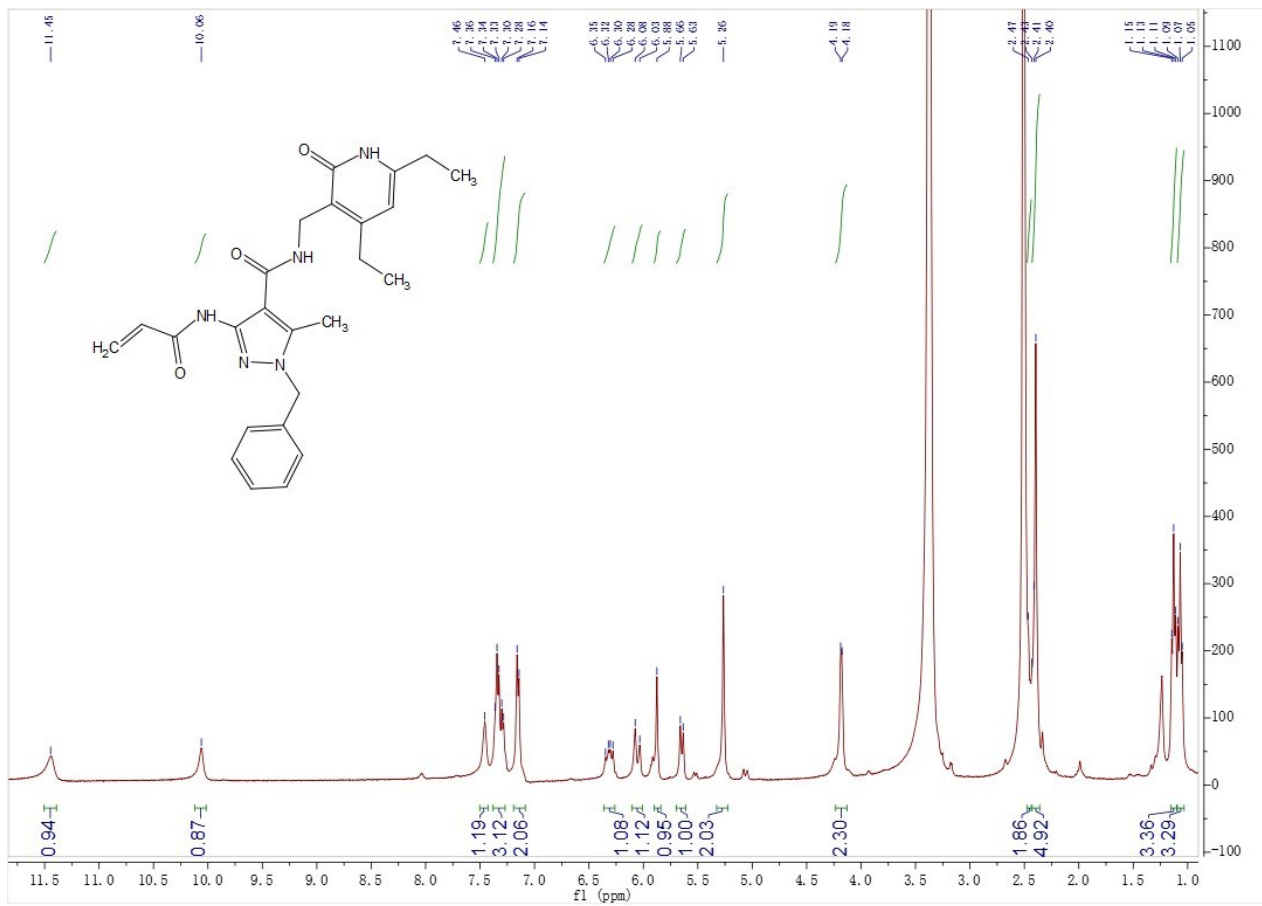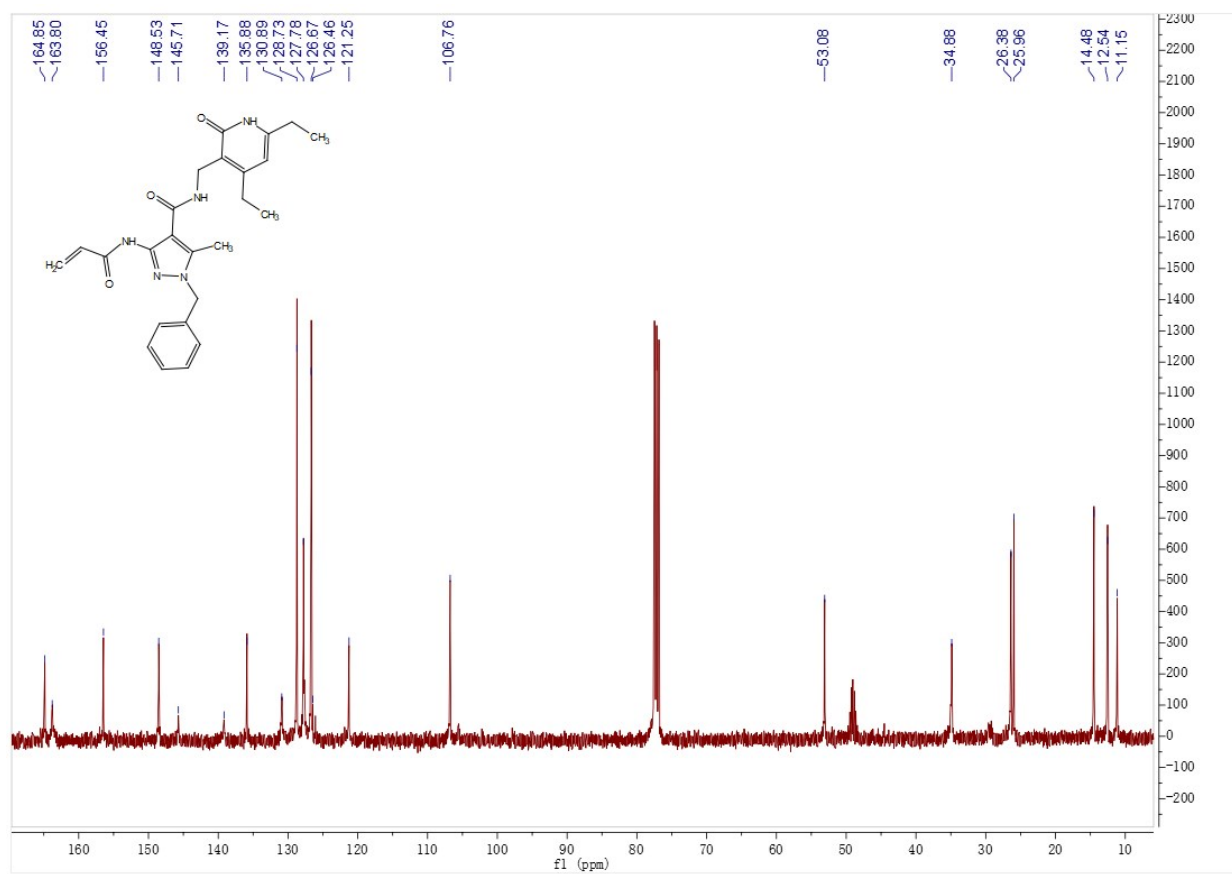

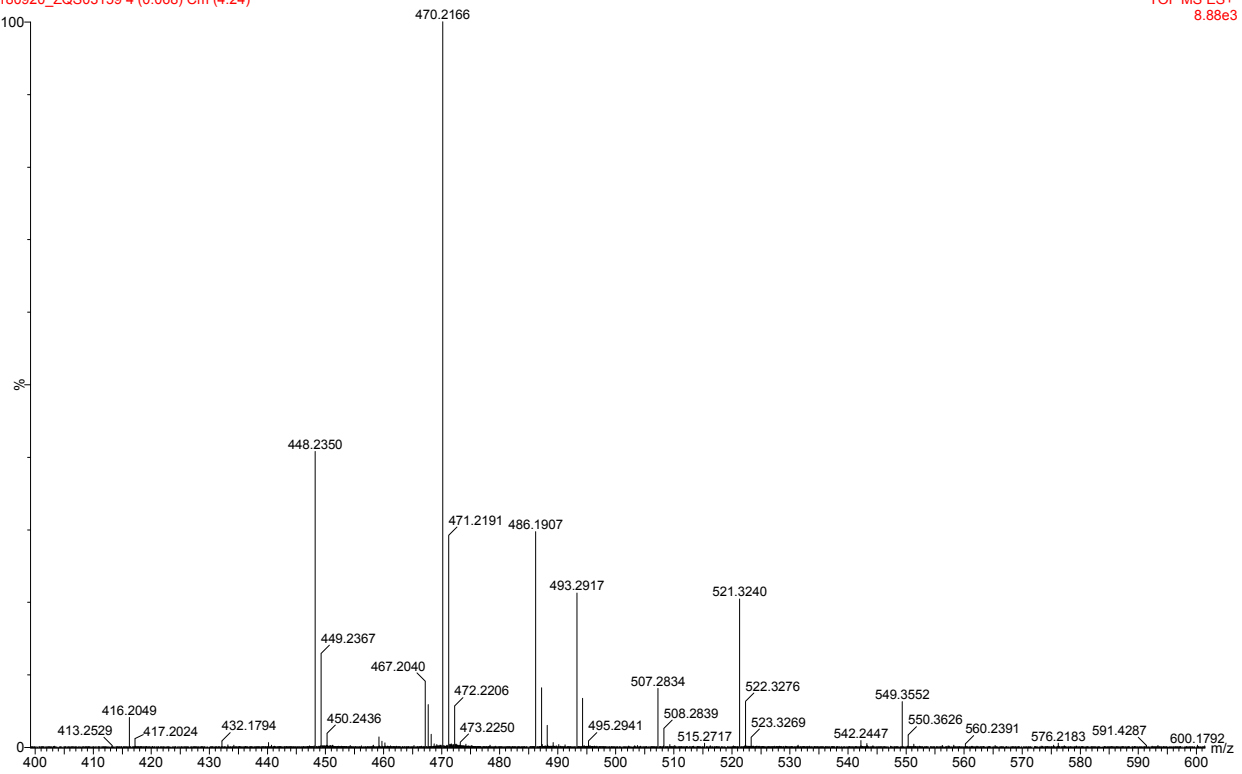

### Compound b4

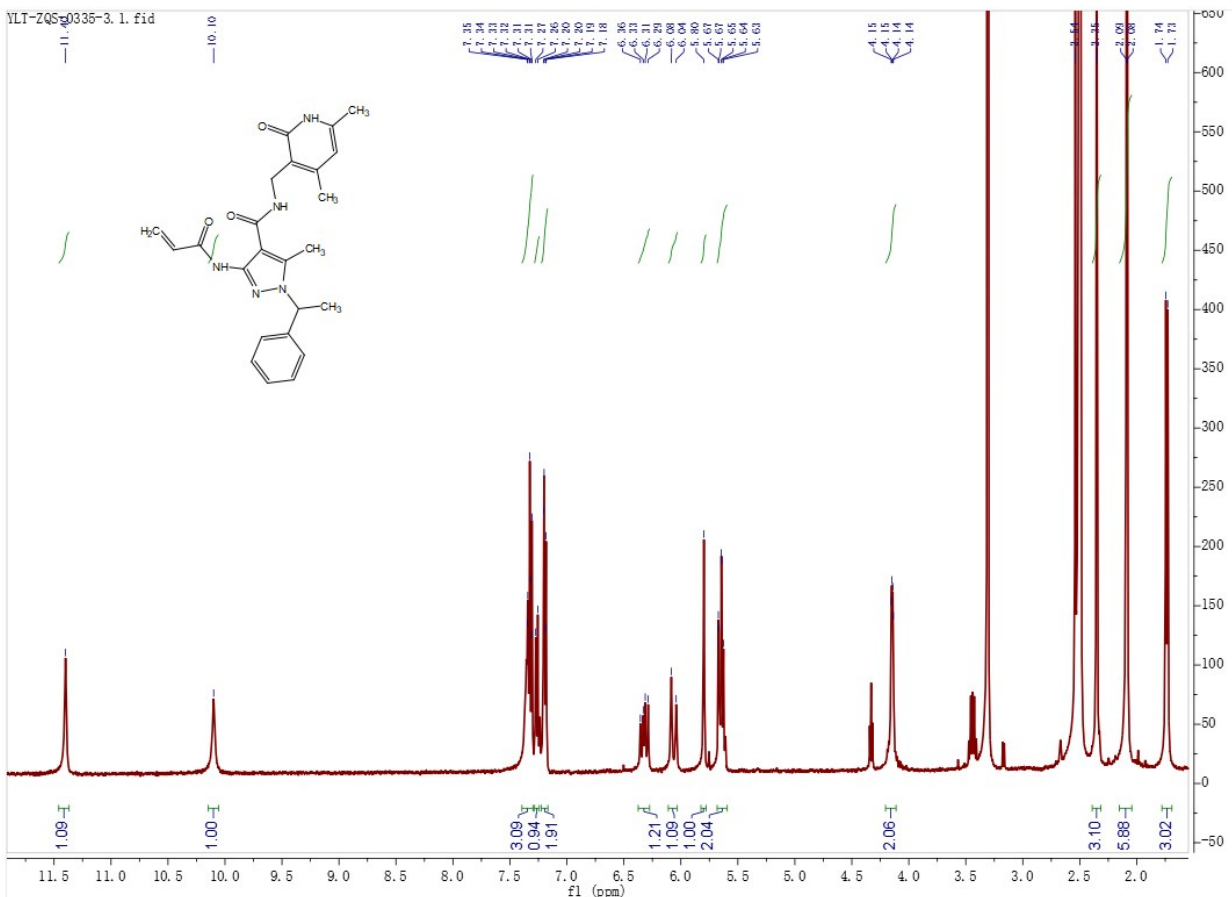

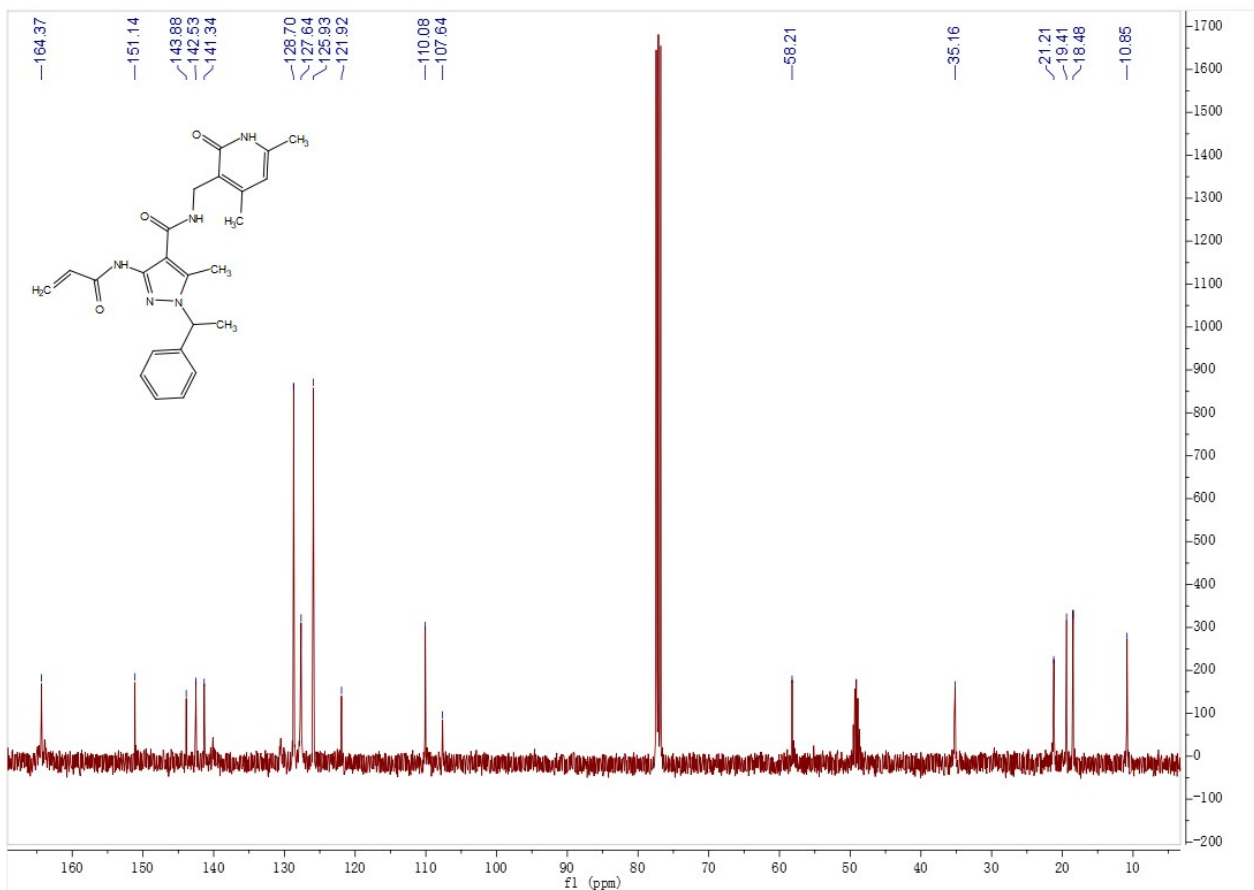

10:09:26  
200425\_0335 24 (0.410) Cm (4:24)

25-Apr-2020  
TOF MS ES+  
5.33e4

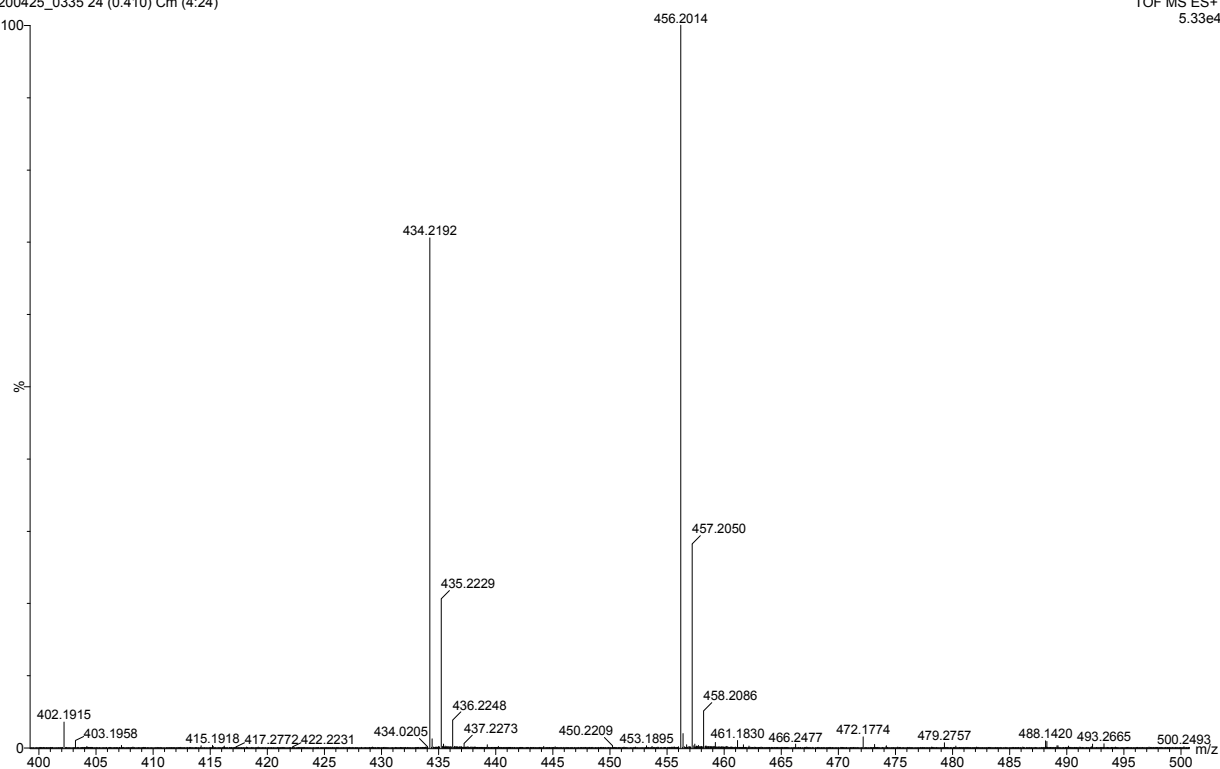

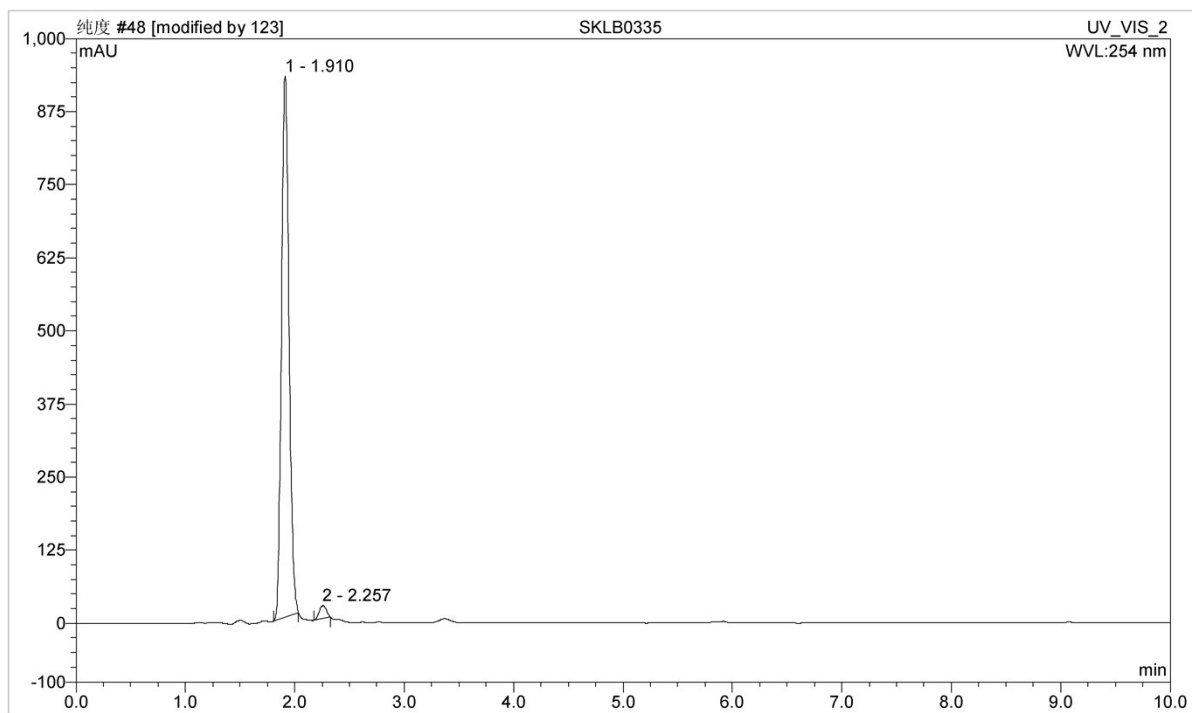

| No.           | Ret. Time min | Peak Name | Height mAU | Area mAU*min | Rel. Area % | Amount | Type |
|---------------|---------------|-----------|------------|--------------|-------------|--------|------|
| 1             | 1.91          | n.a.      | 925.134    | 73.666       | 97.77       | n.a.   | BMB* |
| 2             | 2.26          | n.a.      | 22.146     | 1.680        | 2.23        | n.a.   | BMB* |
| <b>Total:</b> |               |           | 947.279    | 75.346       | 100.00      | 0.000  |      |

Compound b5

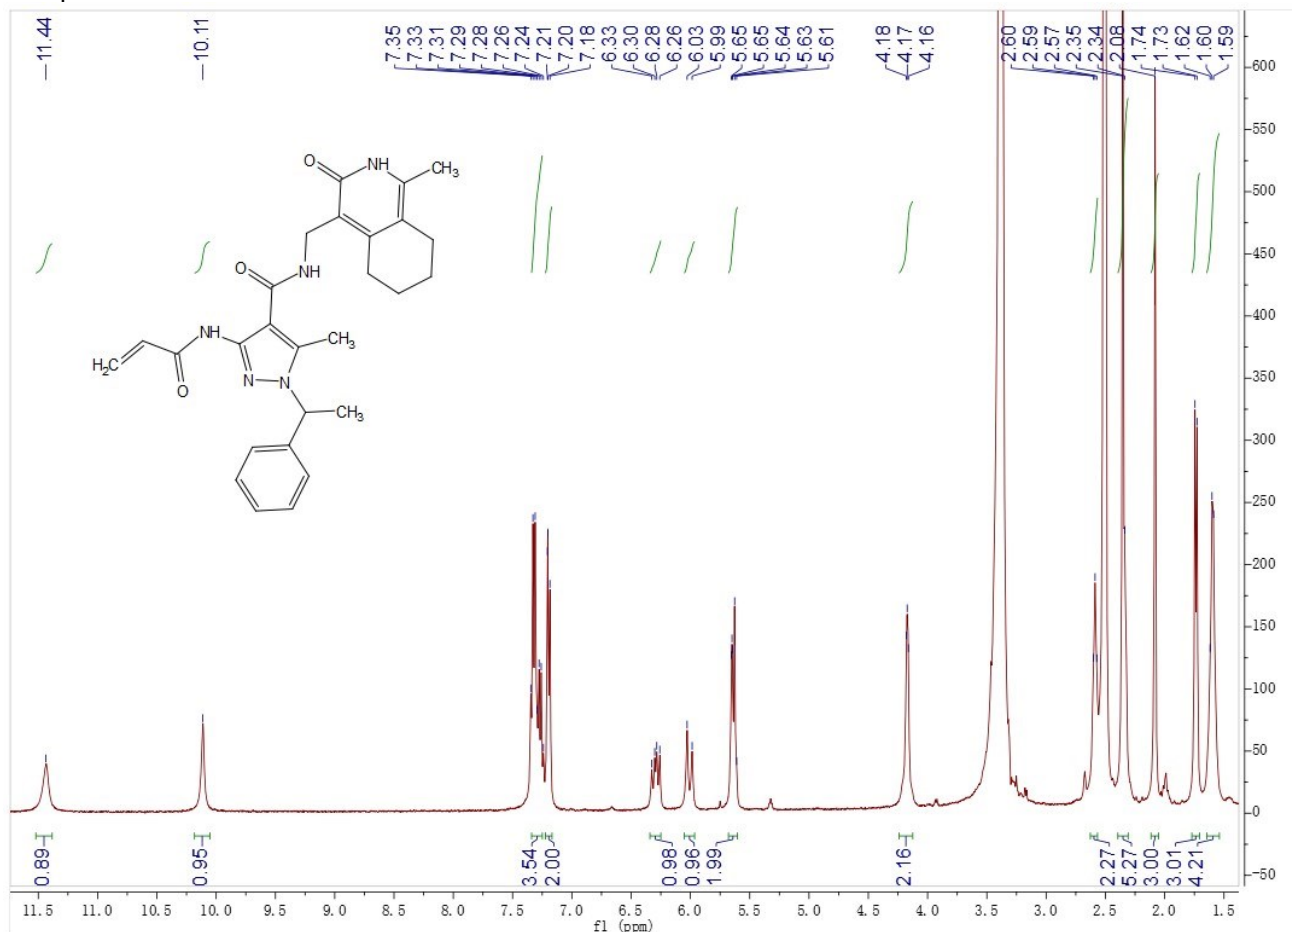



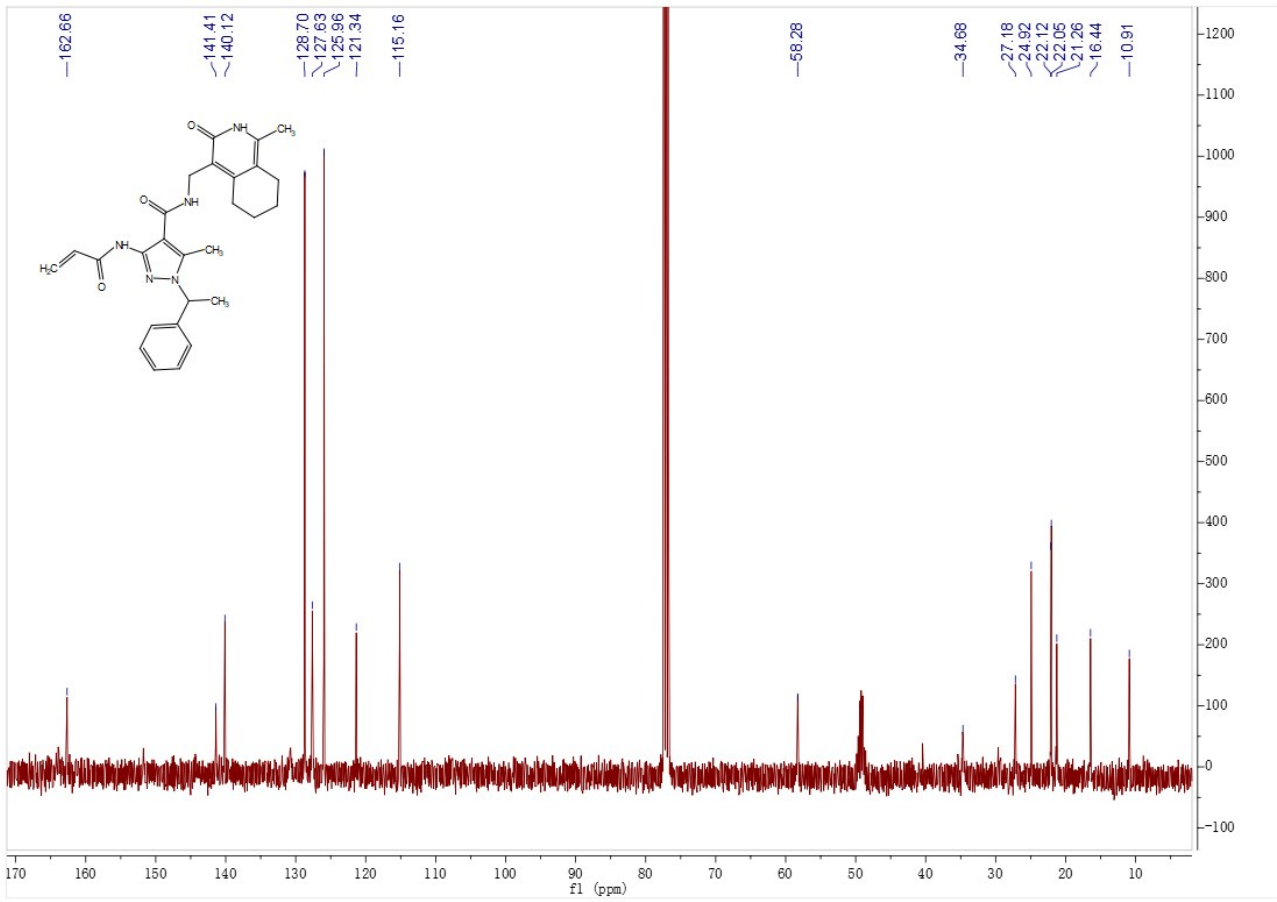

16:58:45  
180920\_ZQS03143 4 (0.068) Cm (4.24)

20-Sep-2018  
TOF MS ES+  
1.20e4

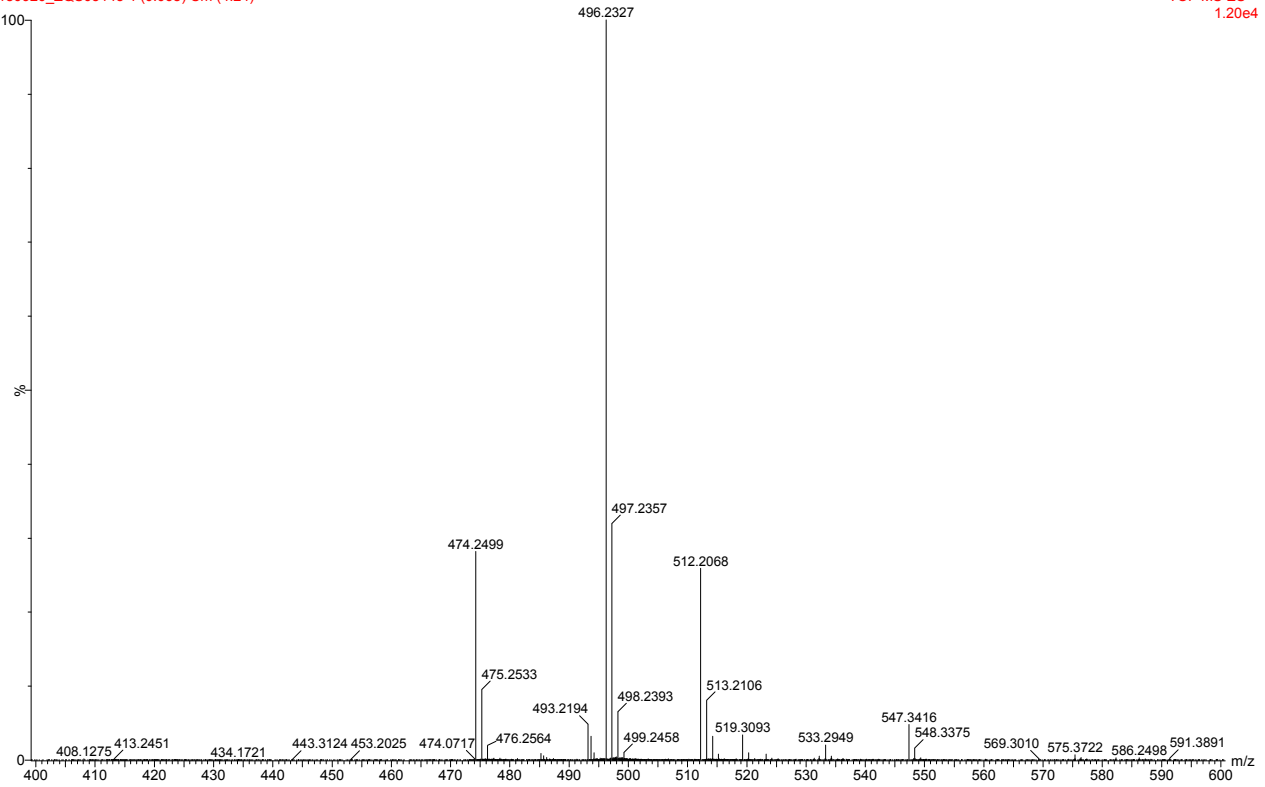

Compound **b6**

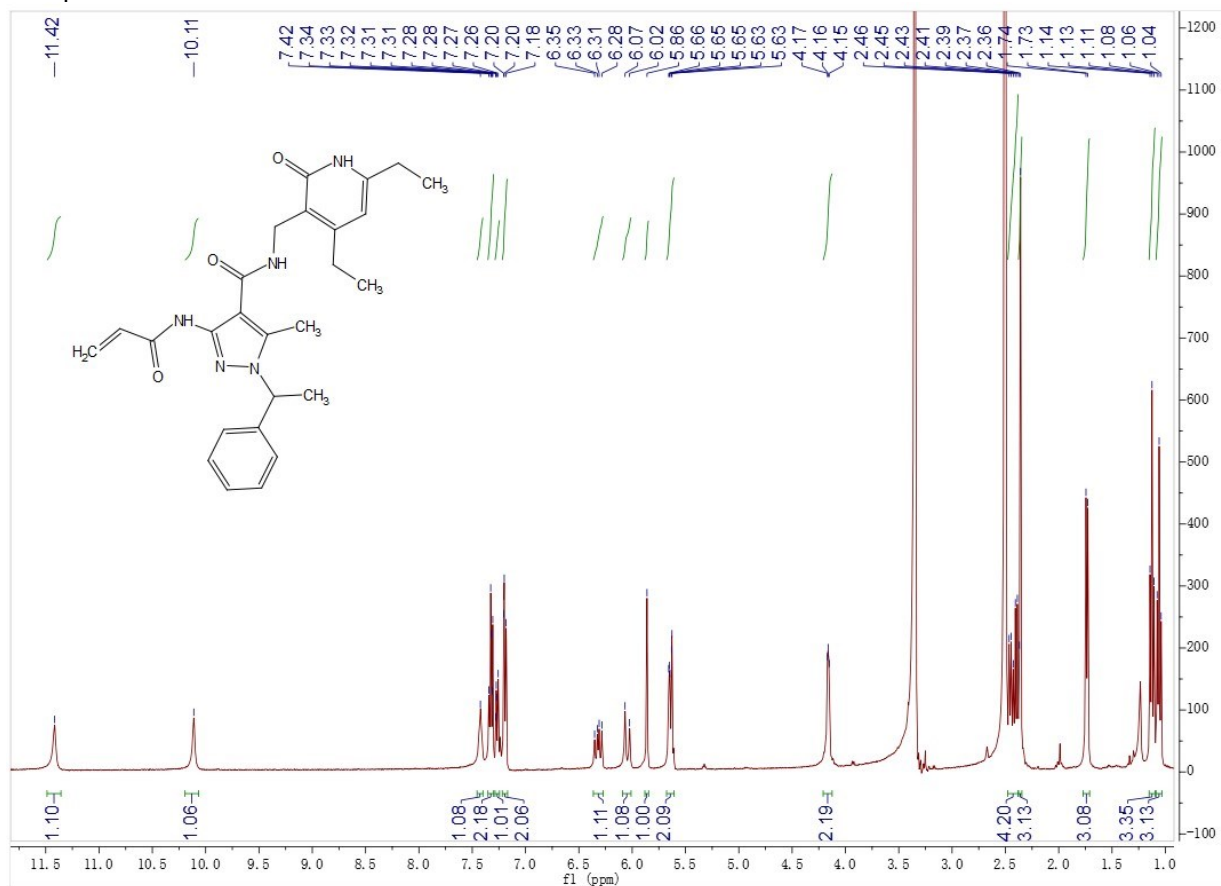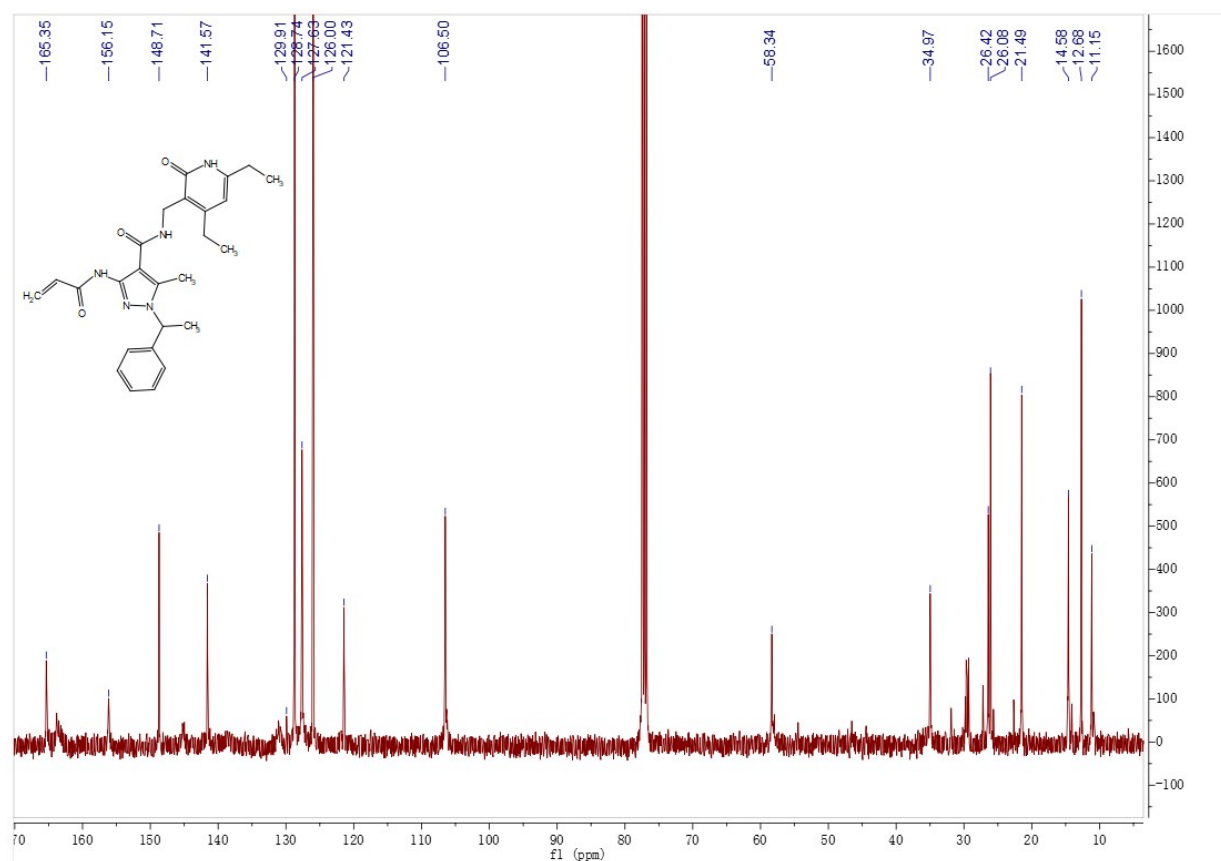

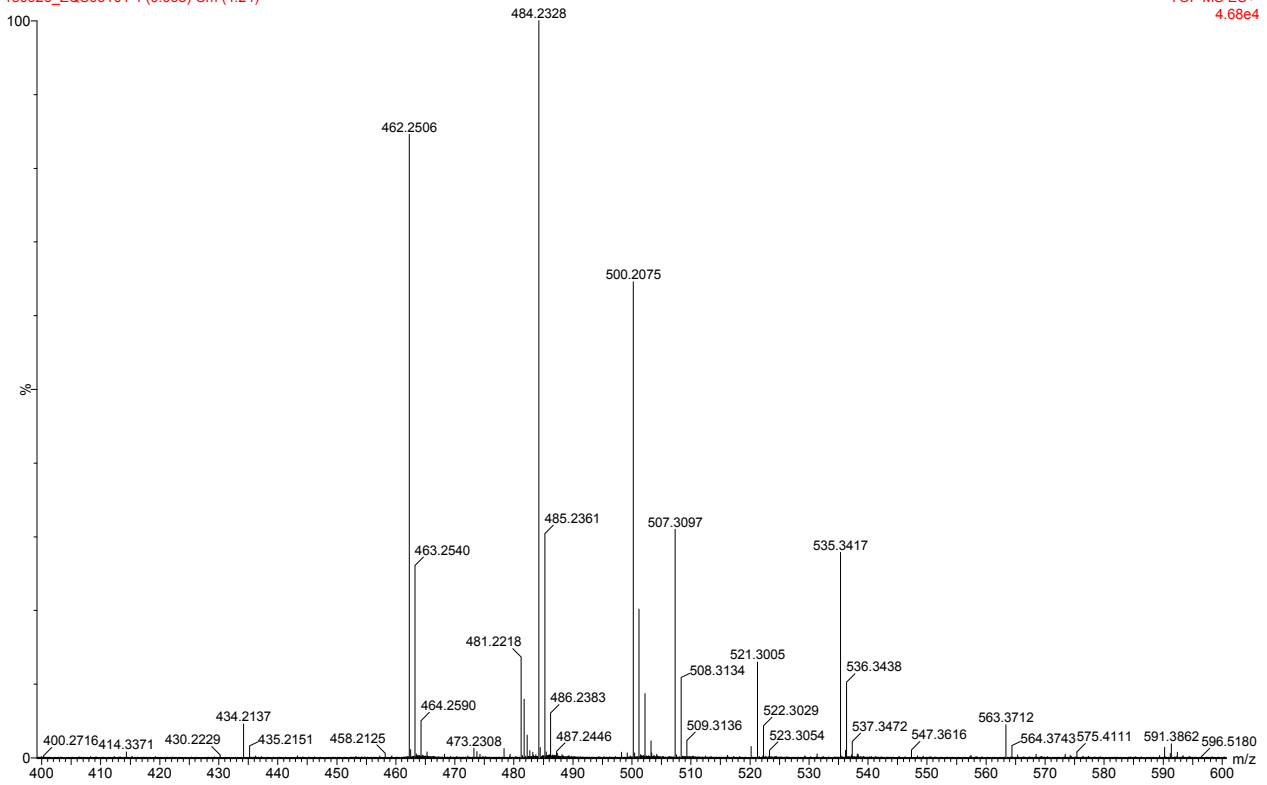

Compound b7

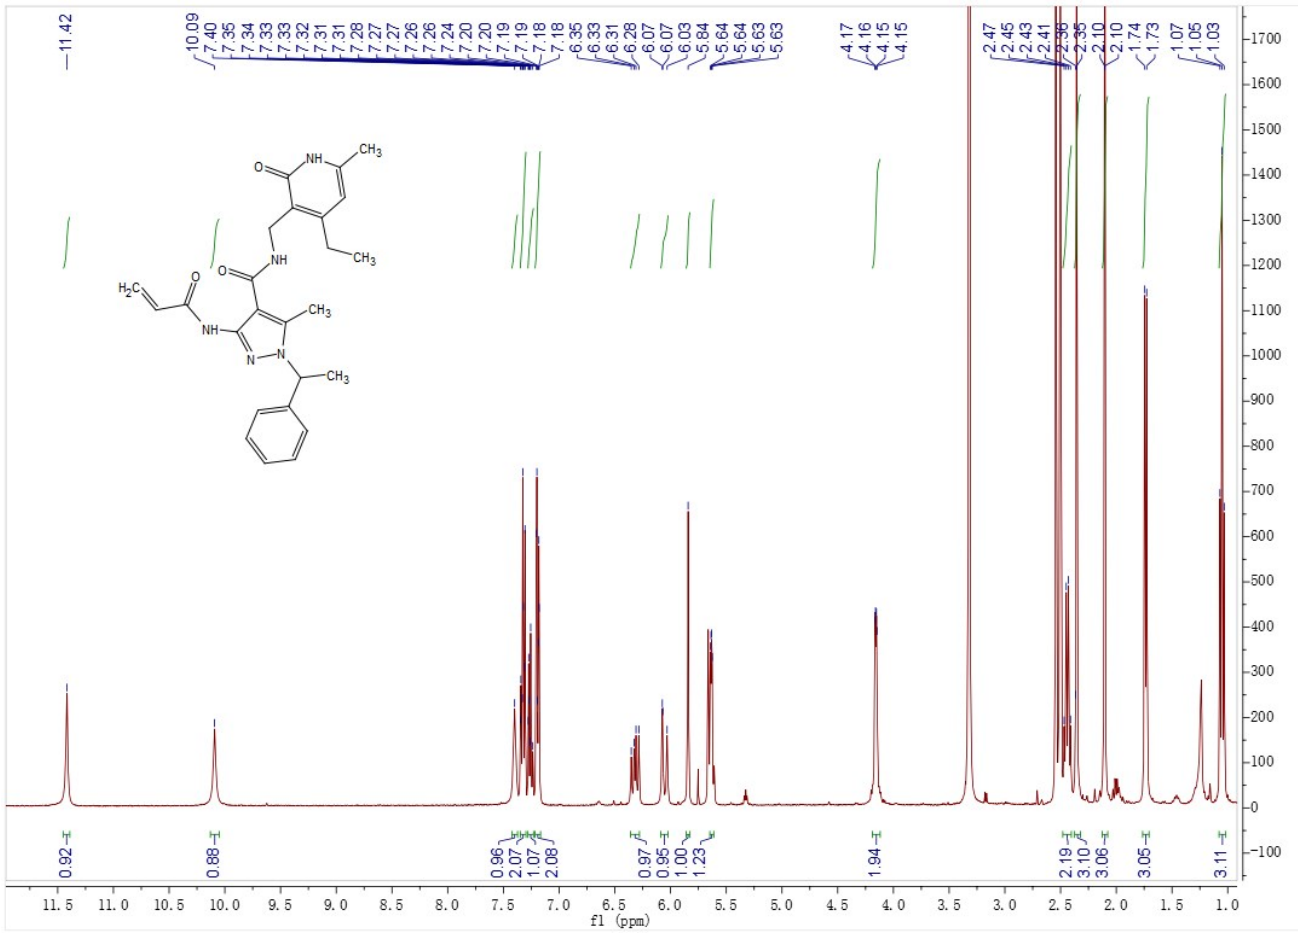

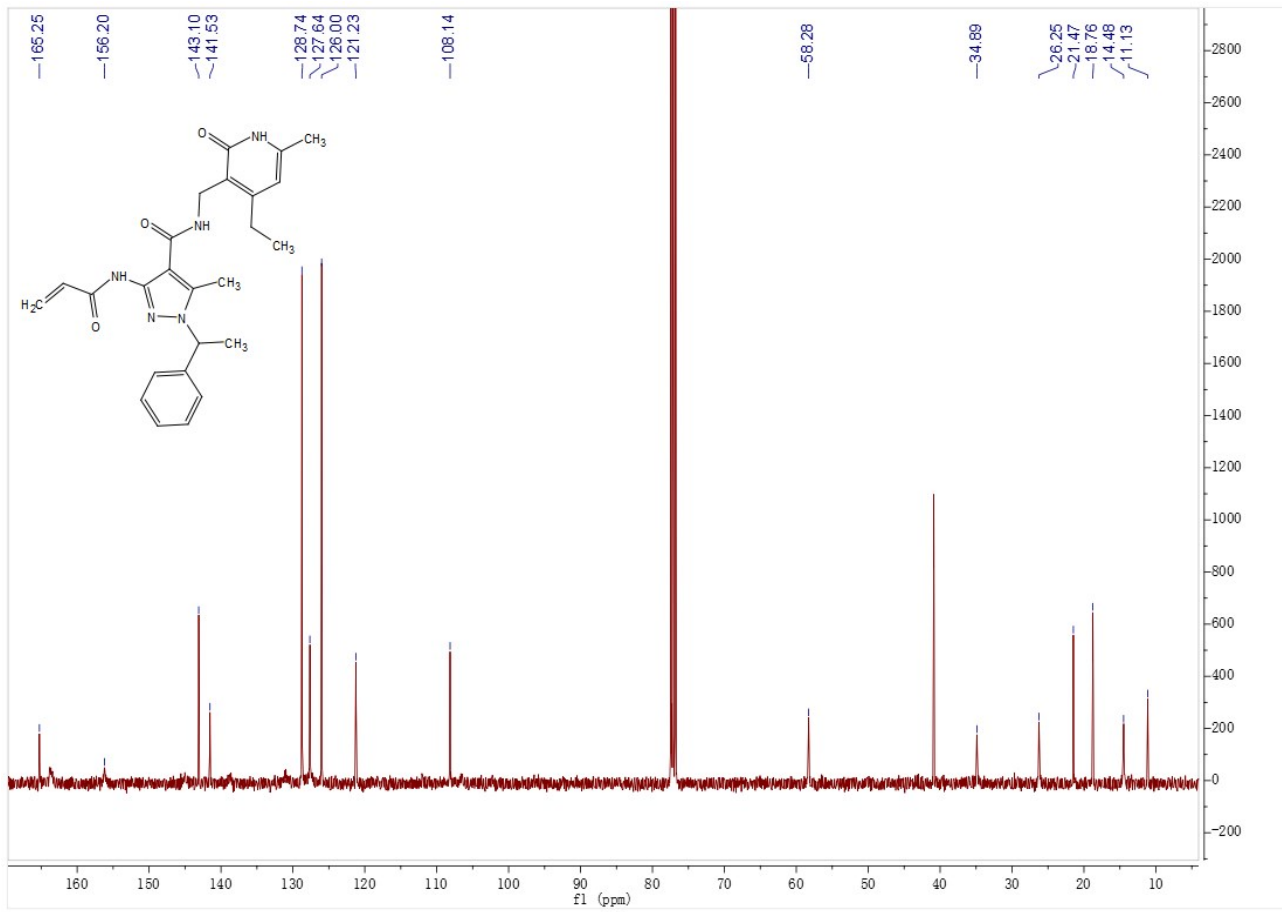

17:49:36  
180920\_ZQS03185 6 (0.103) Cm (3:23)

20-Sep-2018  
TOF MS ES+  
2.22e4

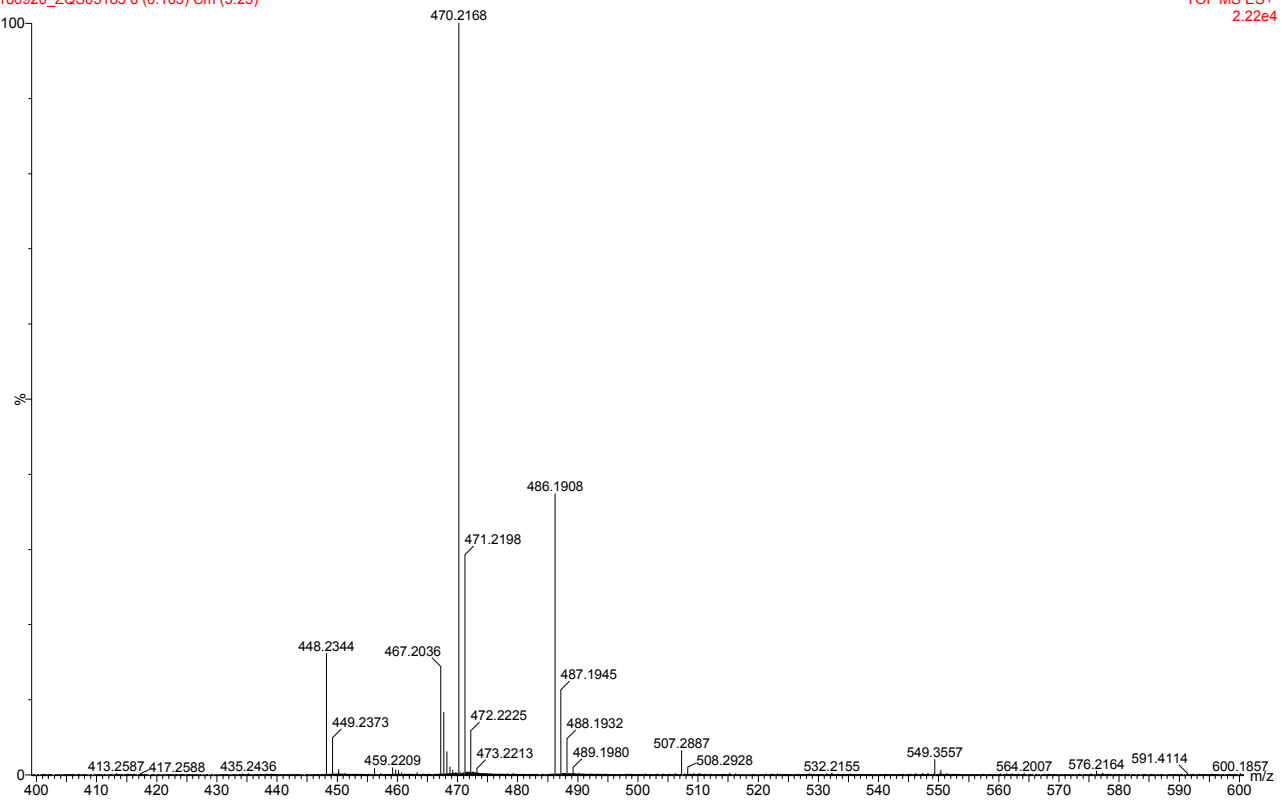

Compound **b8**

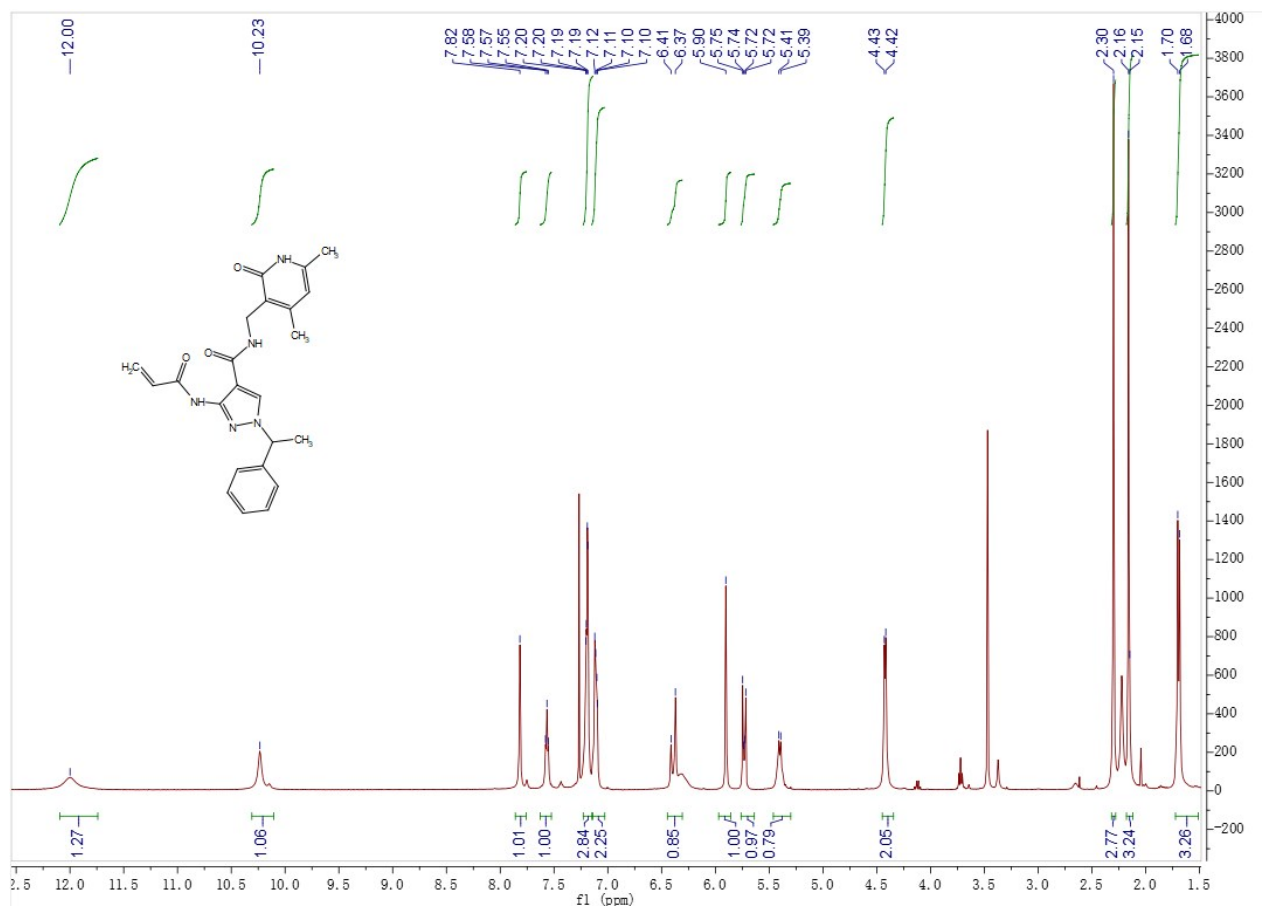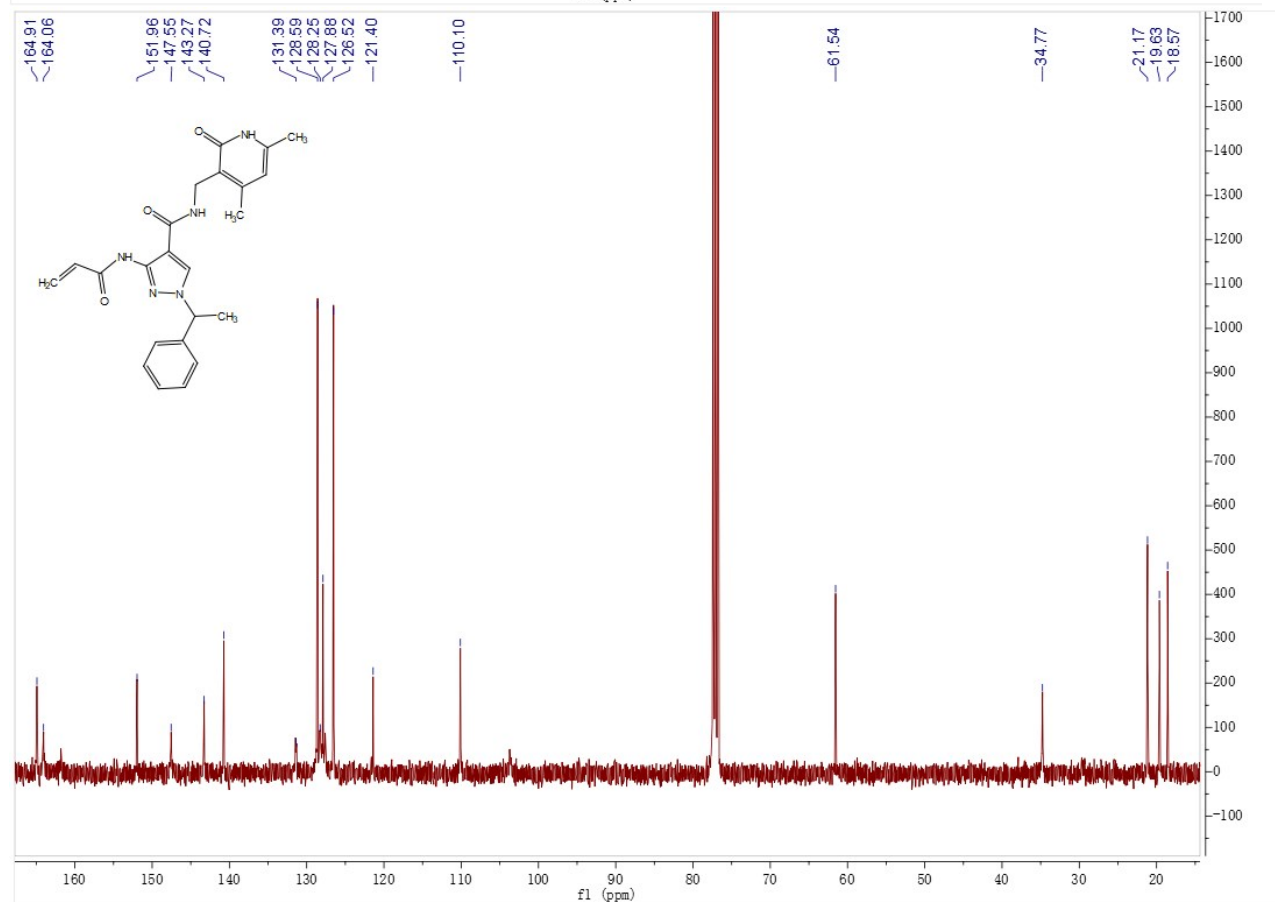

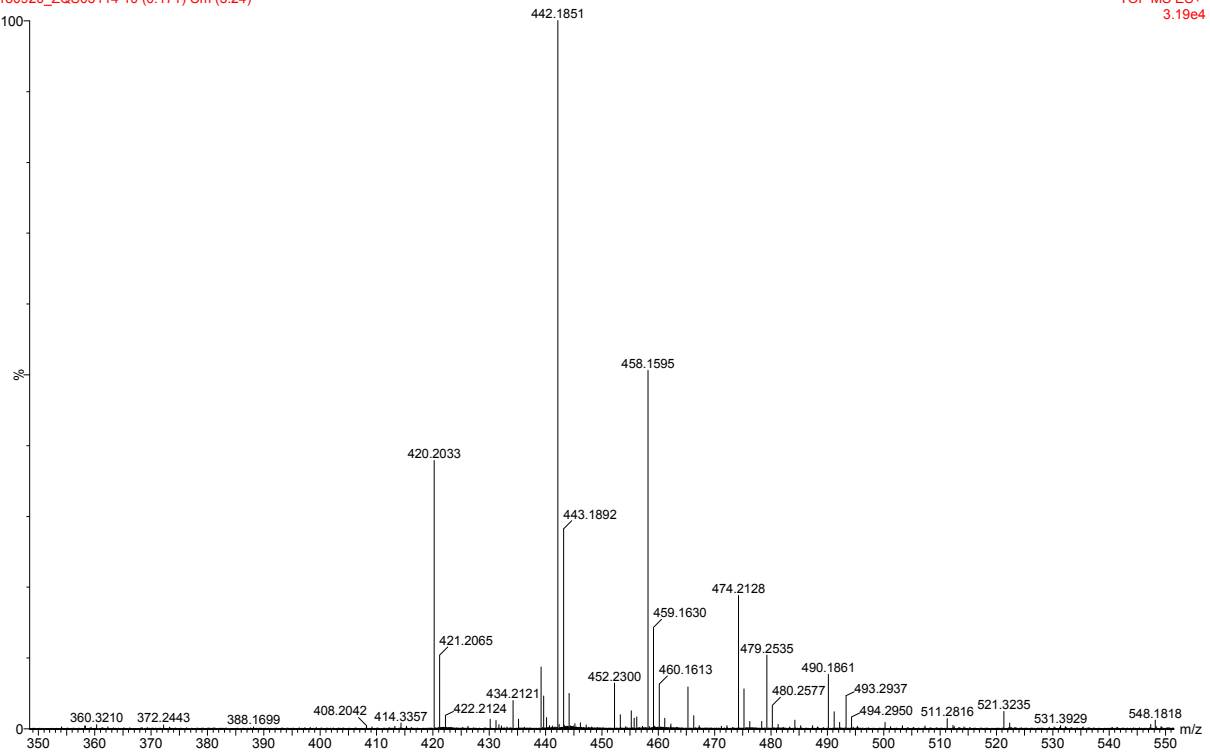

Compound b9

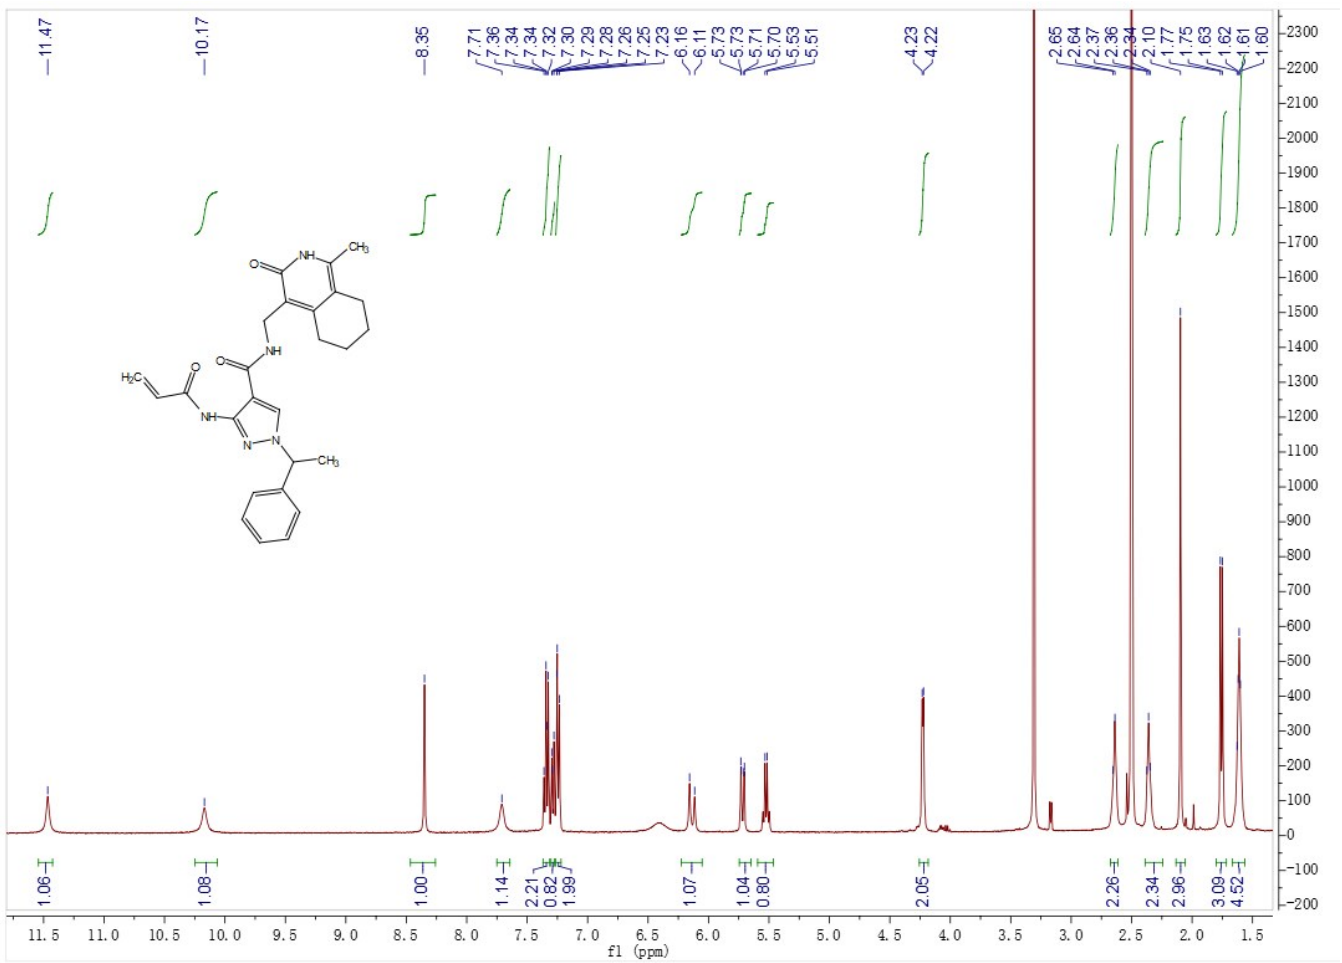

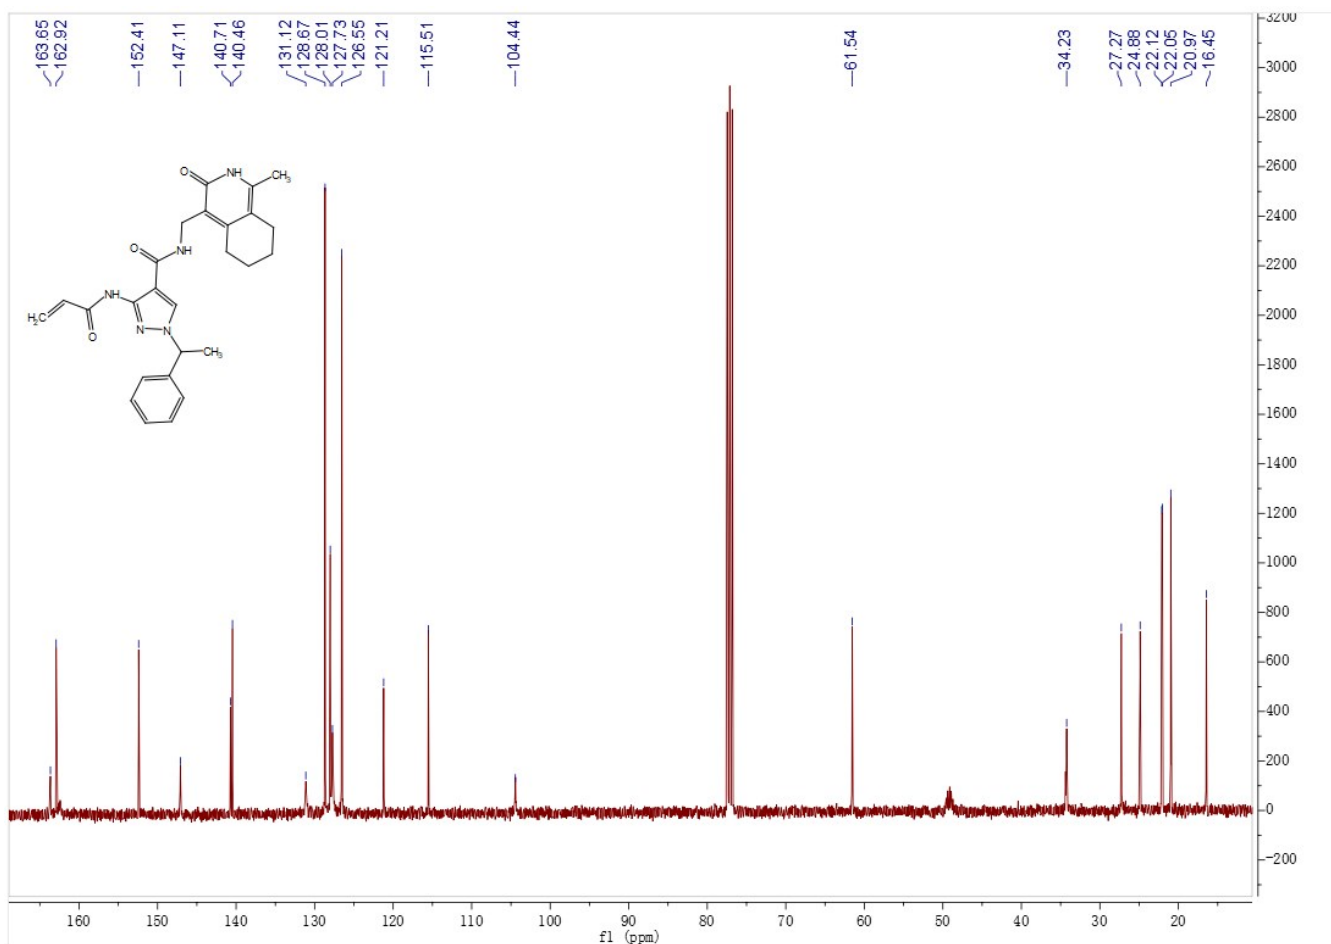

16:51:34  
180920\_ZQS03132 19 (0.325) Cm (4:23)

20-Sep-2018  
TOF MS ES+  
1.10e4

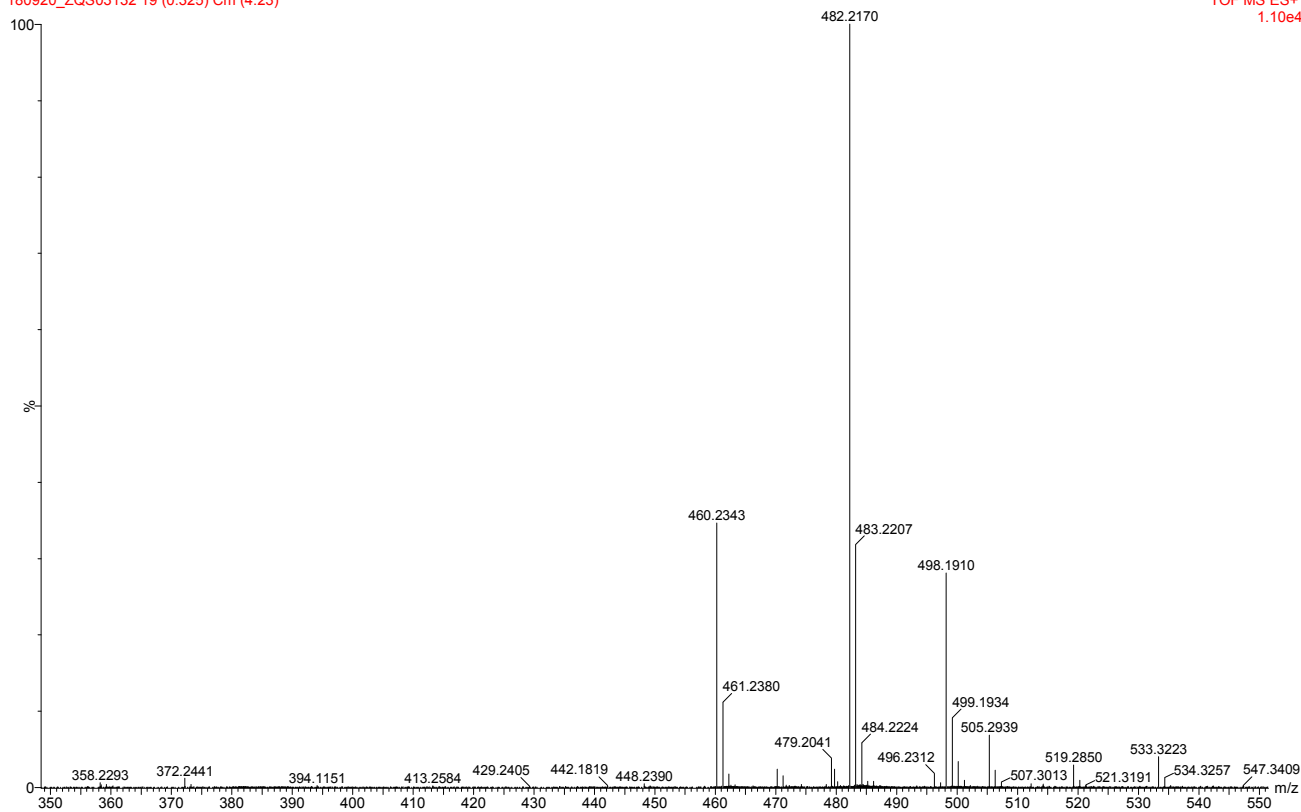

Compound **b10**

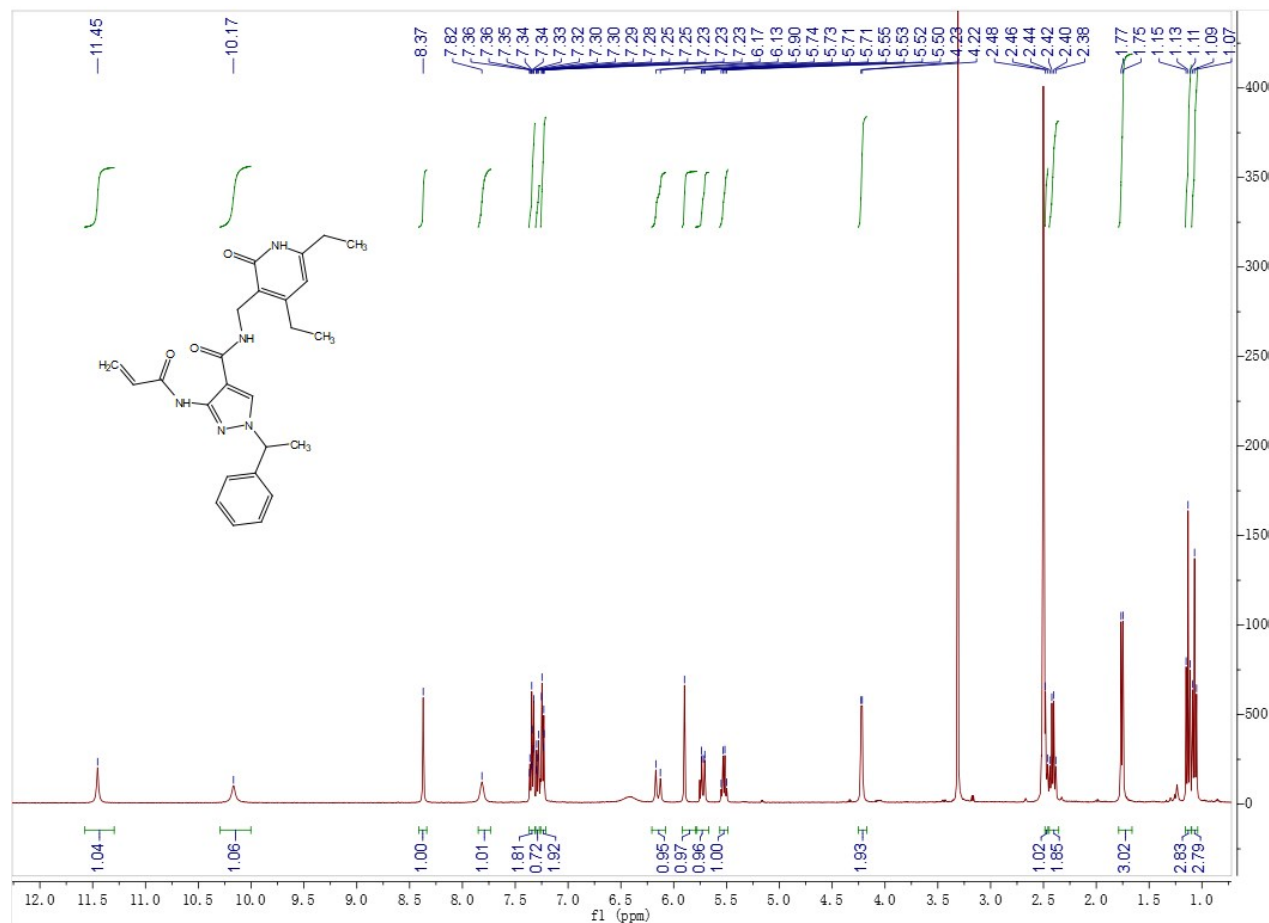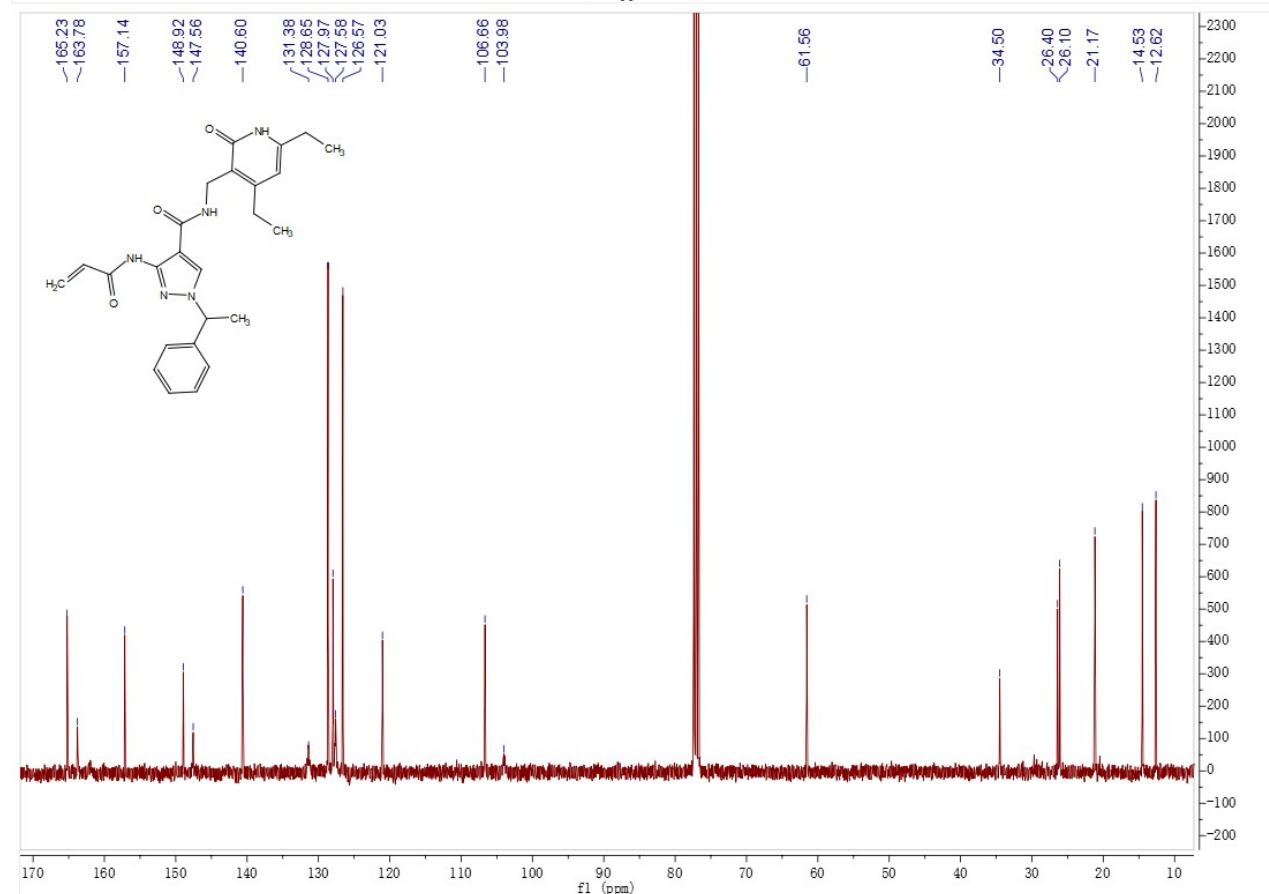



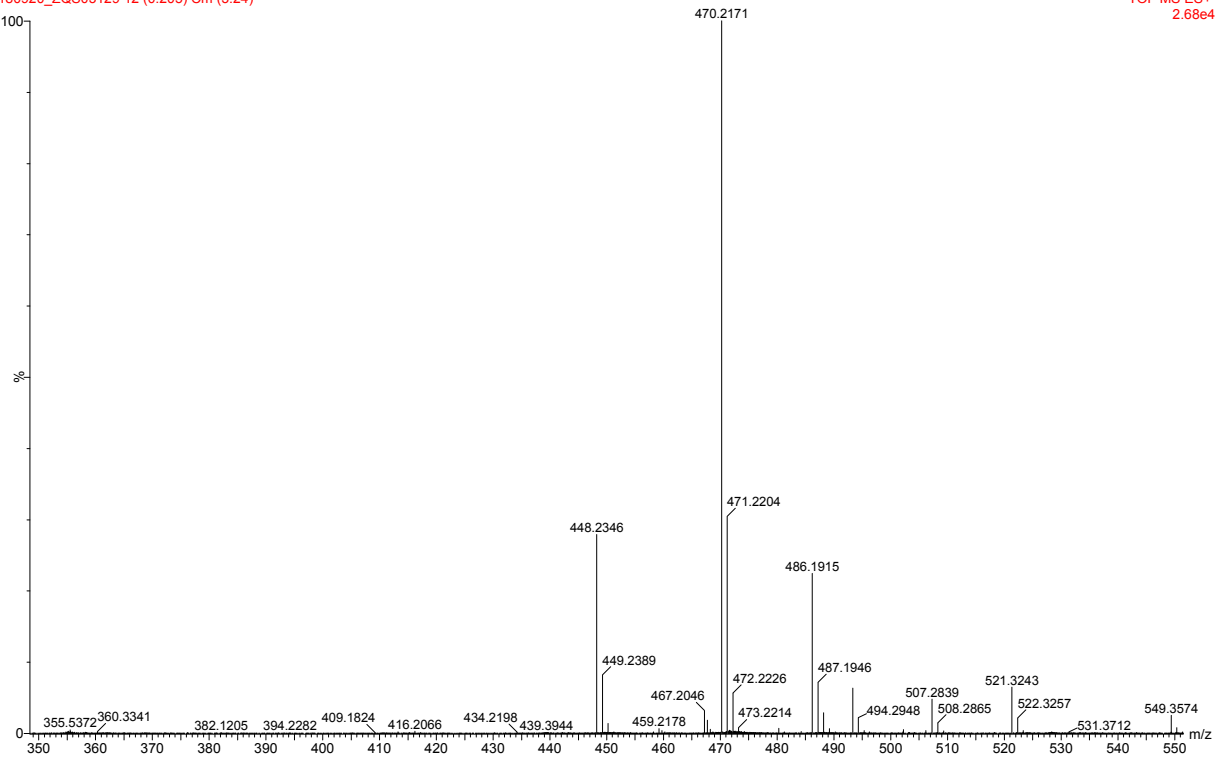

Compound b11

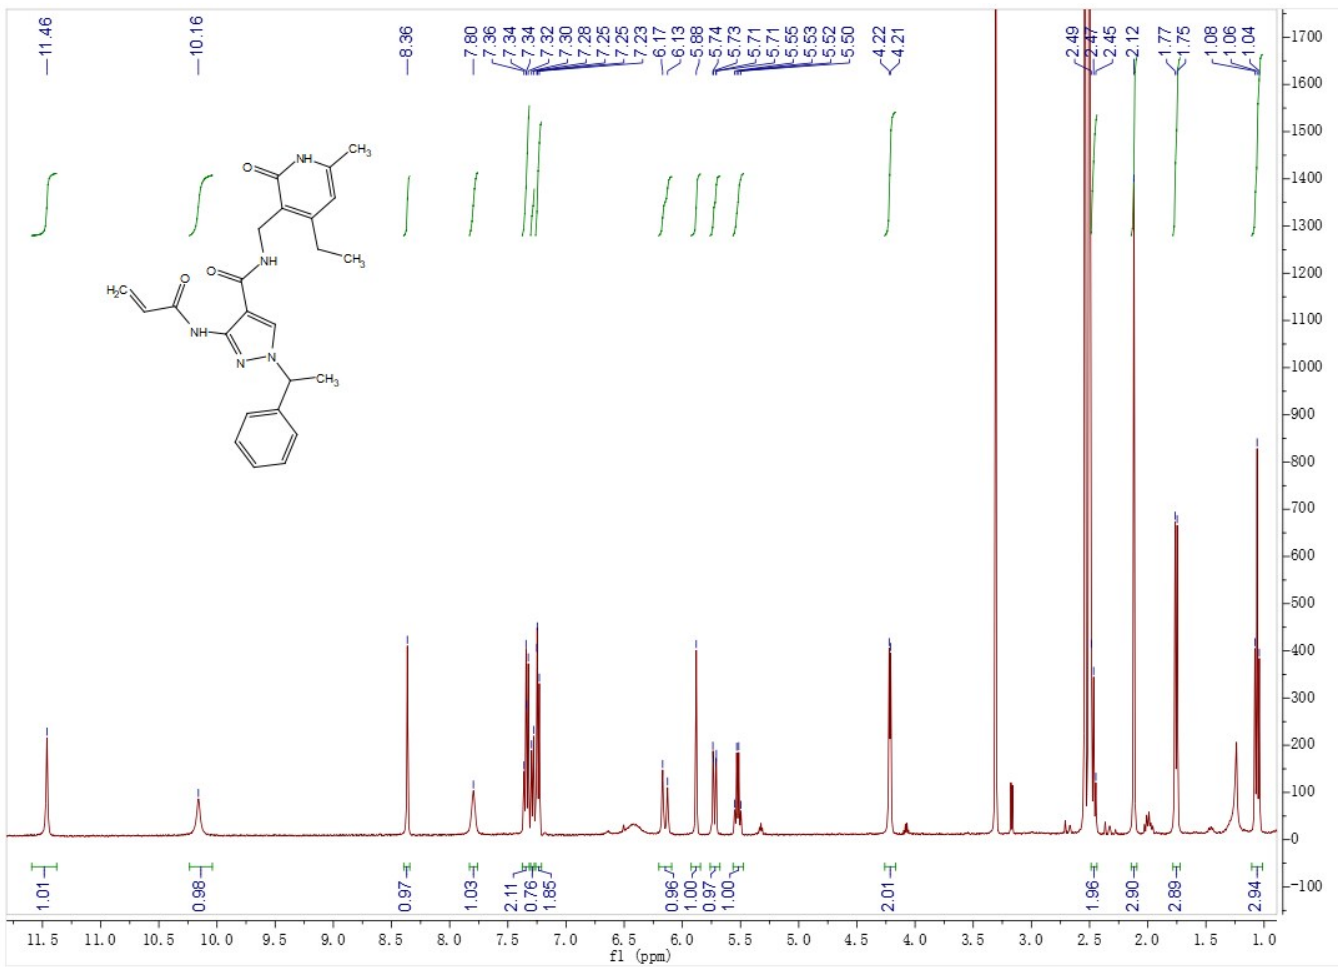

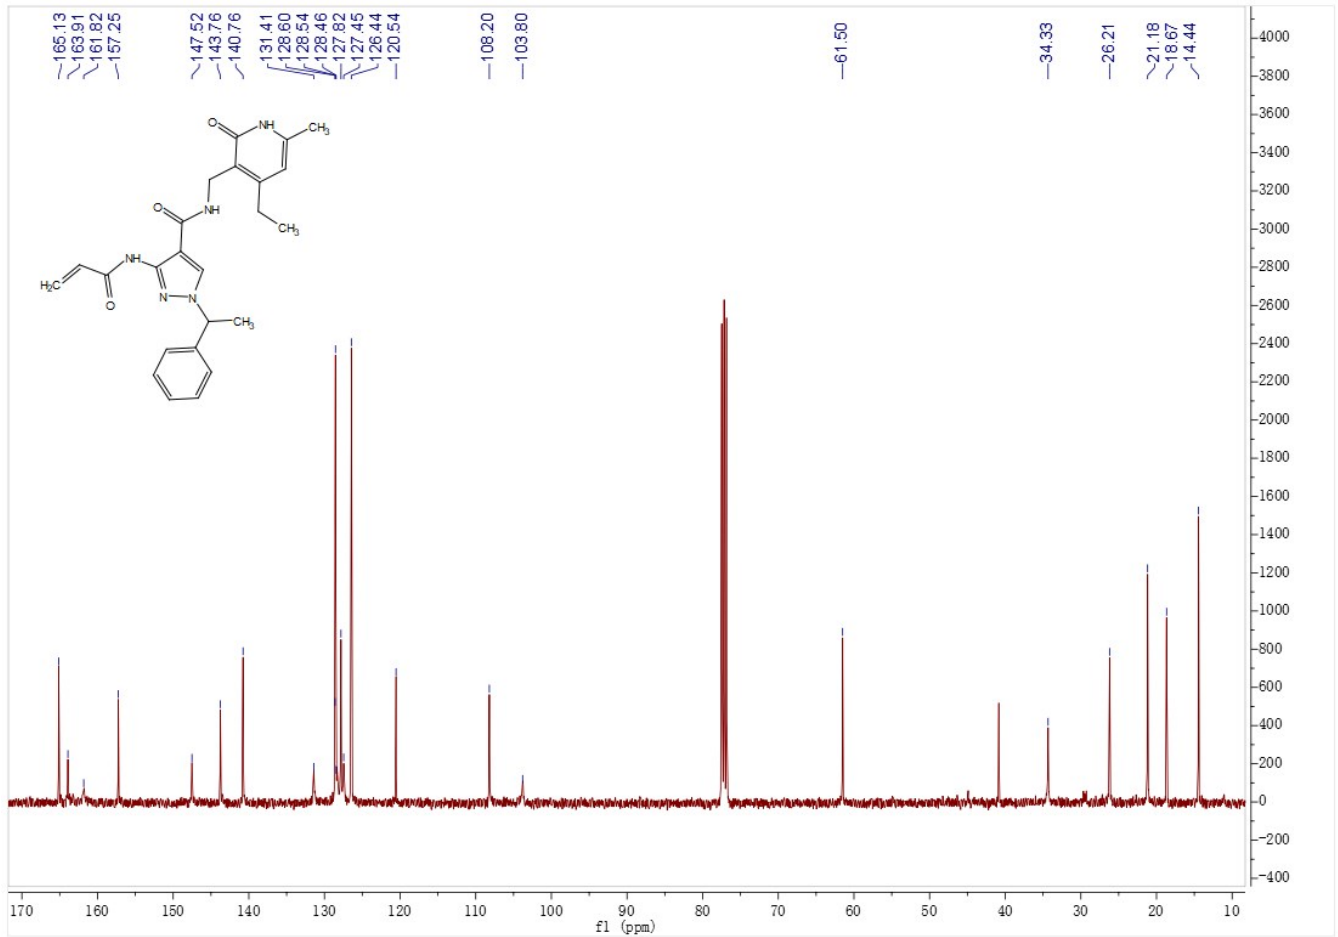

17:48:13  
180920\_ZQS03183 23 (0.393) Cm (3:24)

20-Sep-2018  
TOF MS ES+  
2.05e4

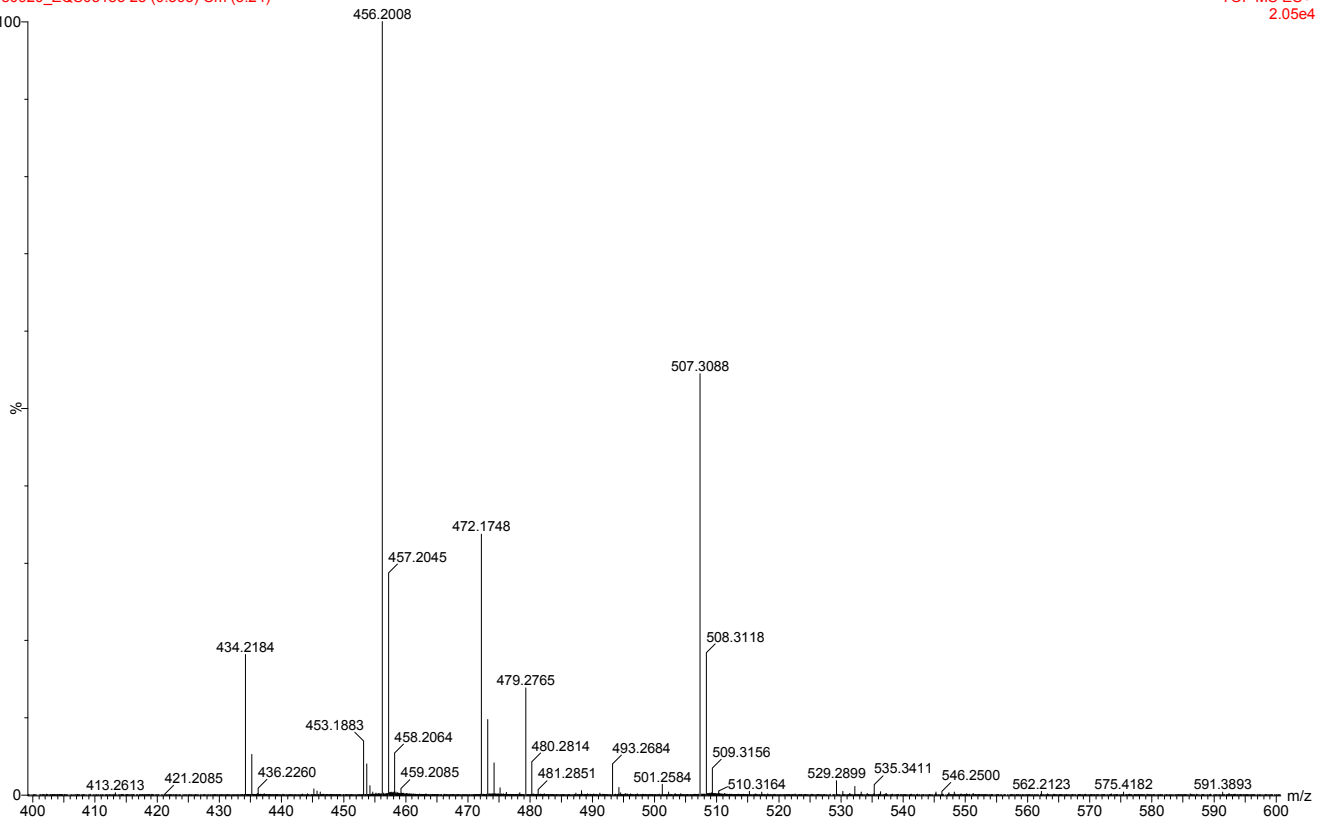

Compound **b12**

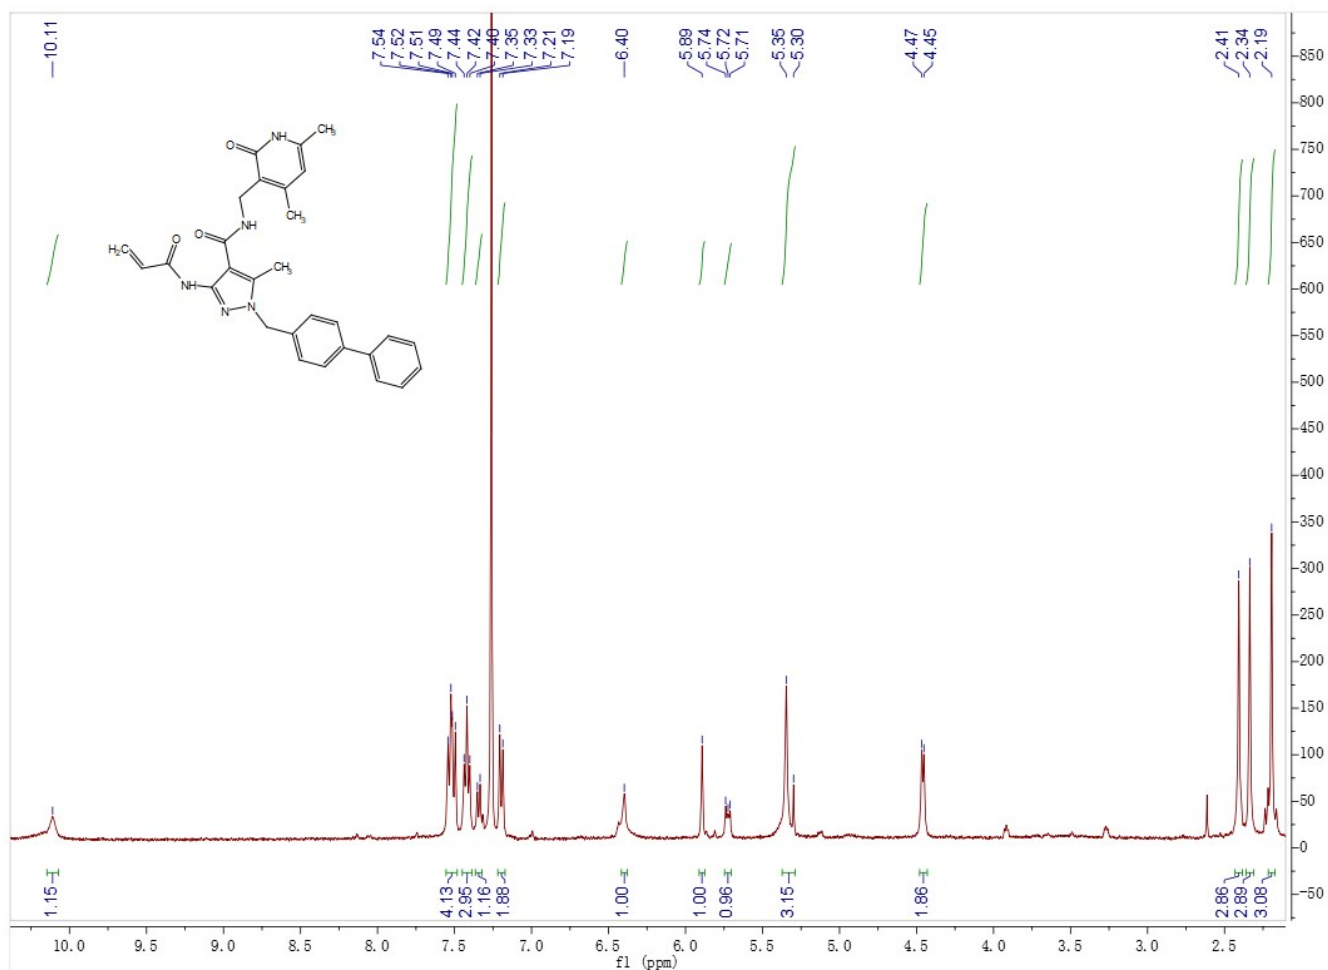

17:25:14  
180920\_ZQS03170 3 (0.051) Cm (3:24)

20-Sep-2018  
TOF MS ES+  
1.21e3

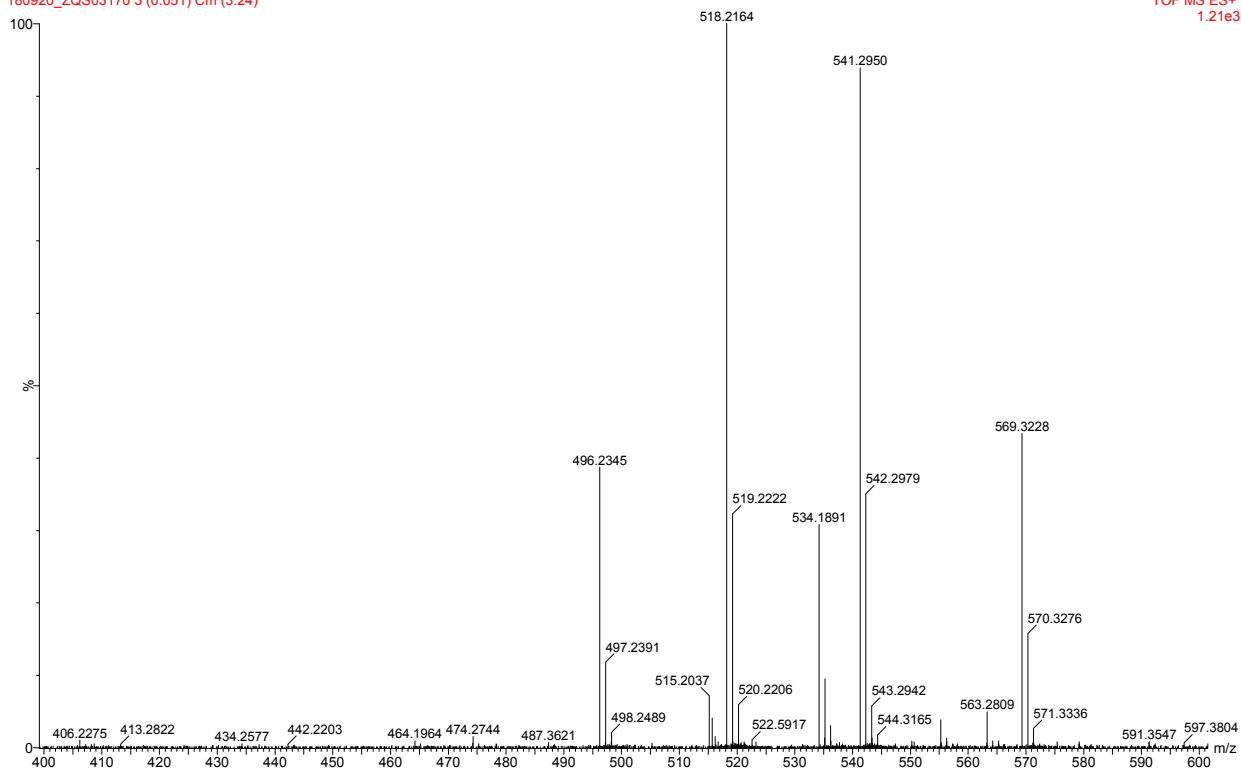

Compound **b13**

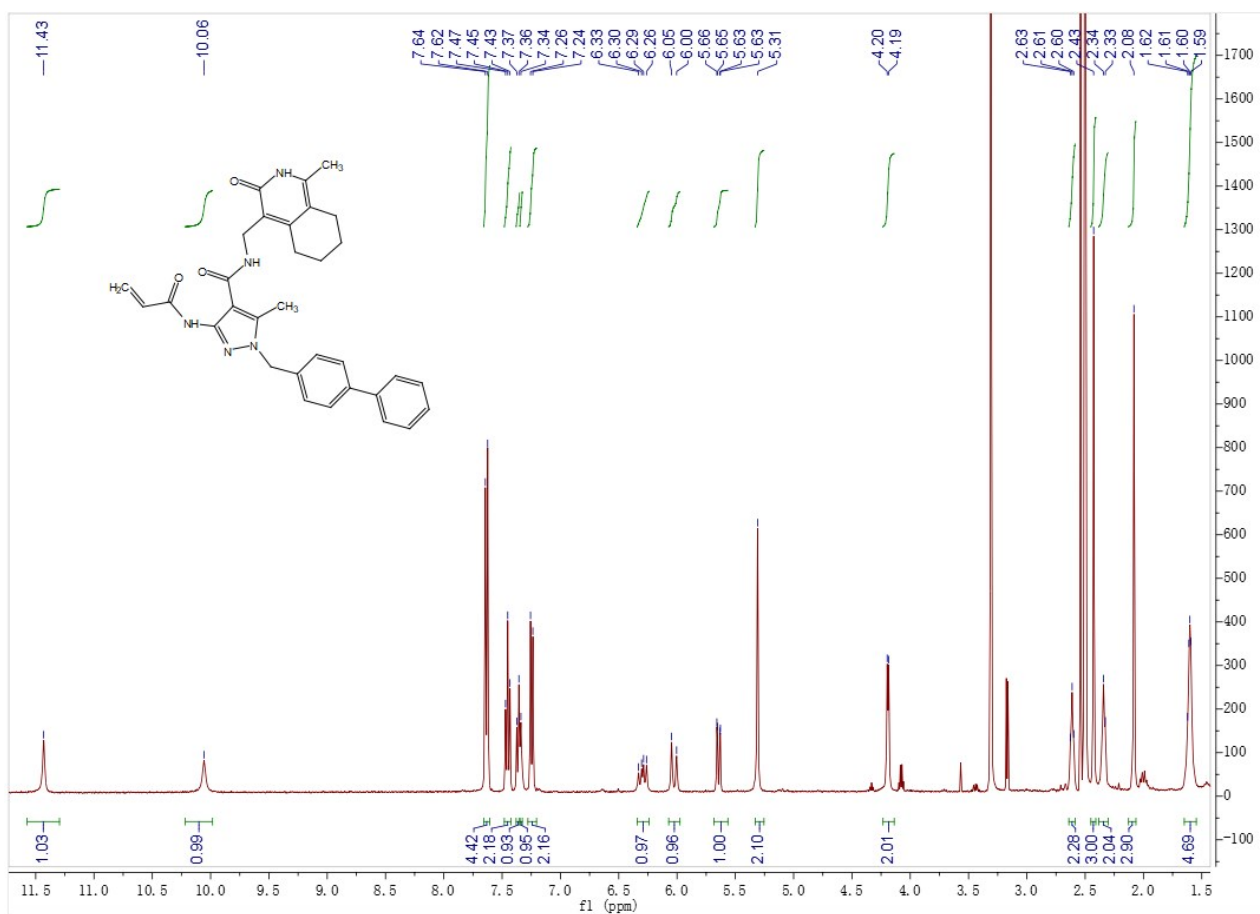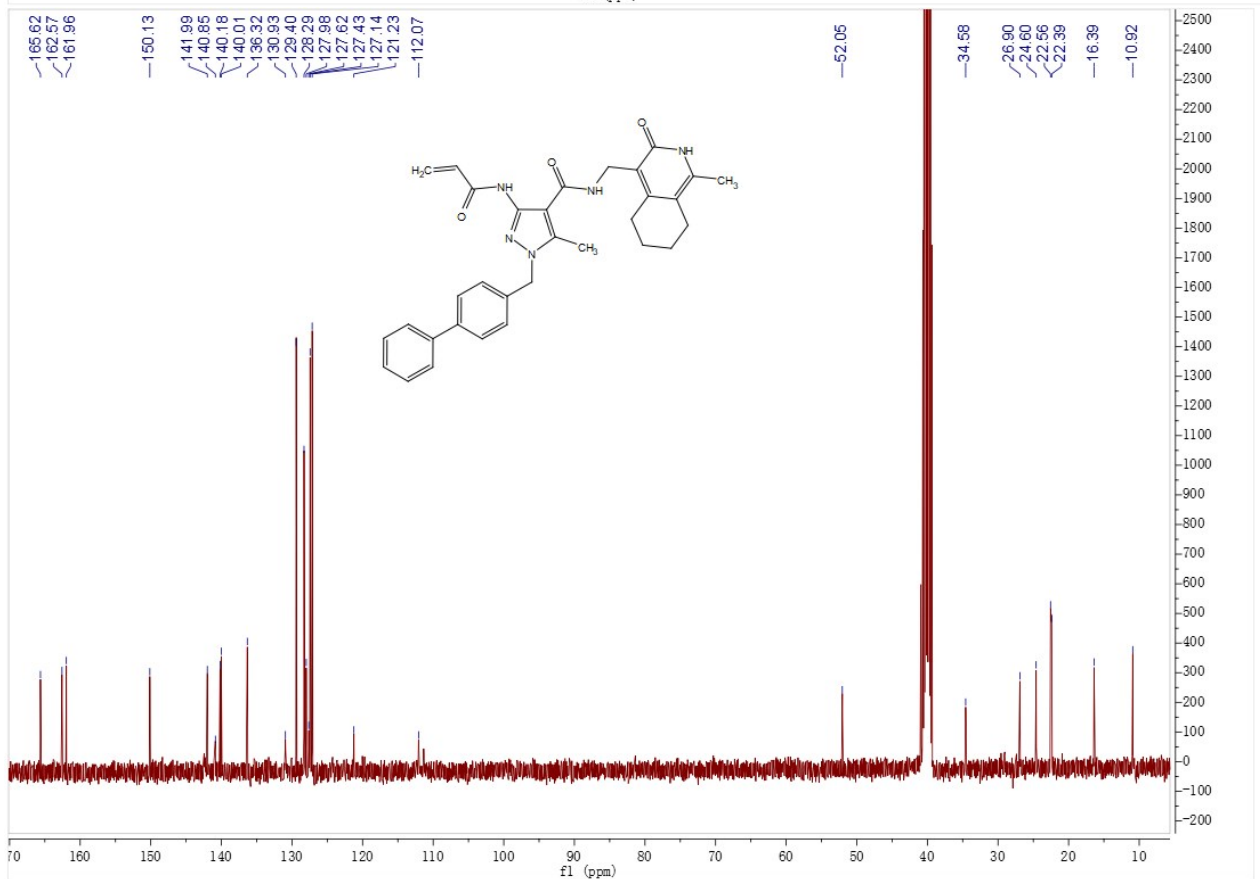

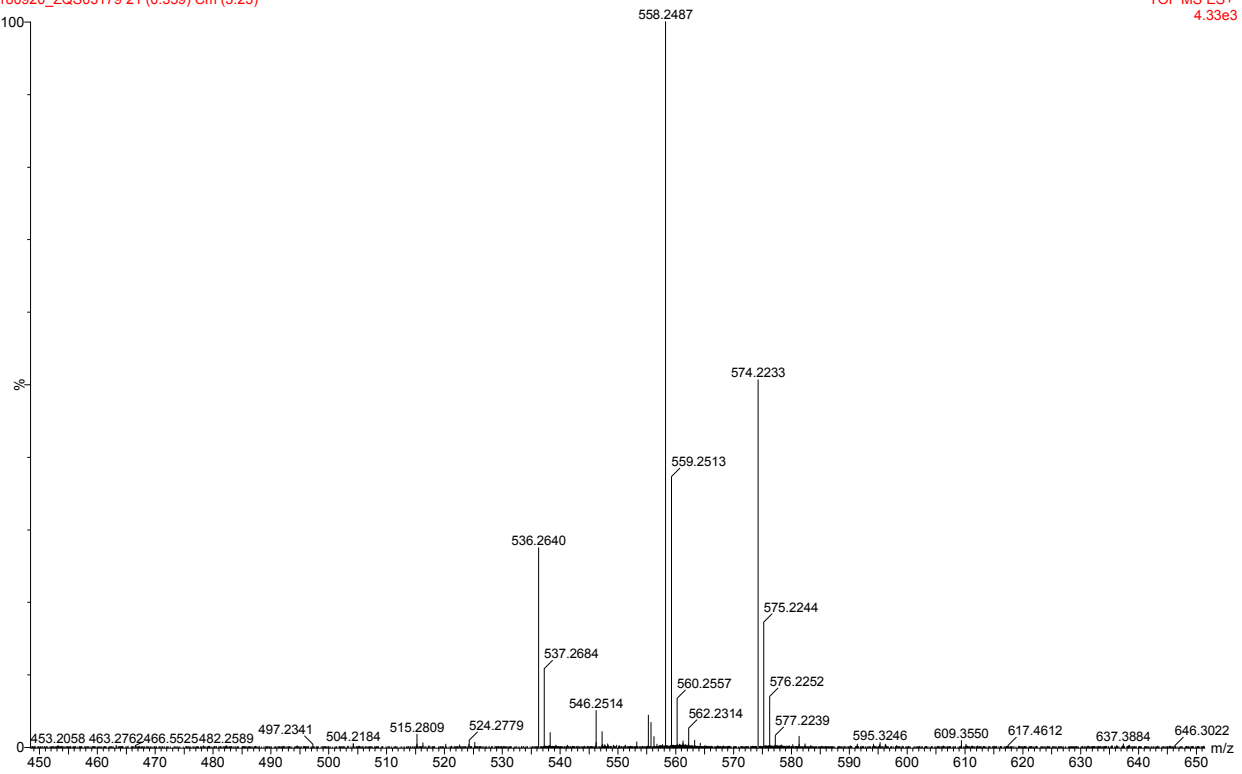

Compound b14

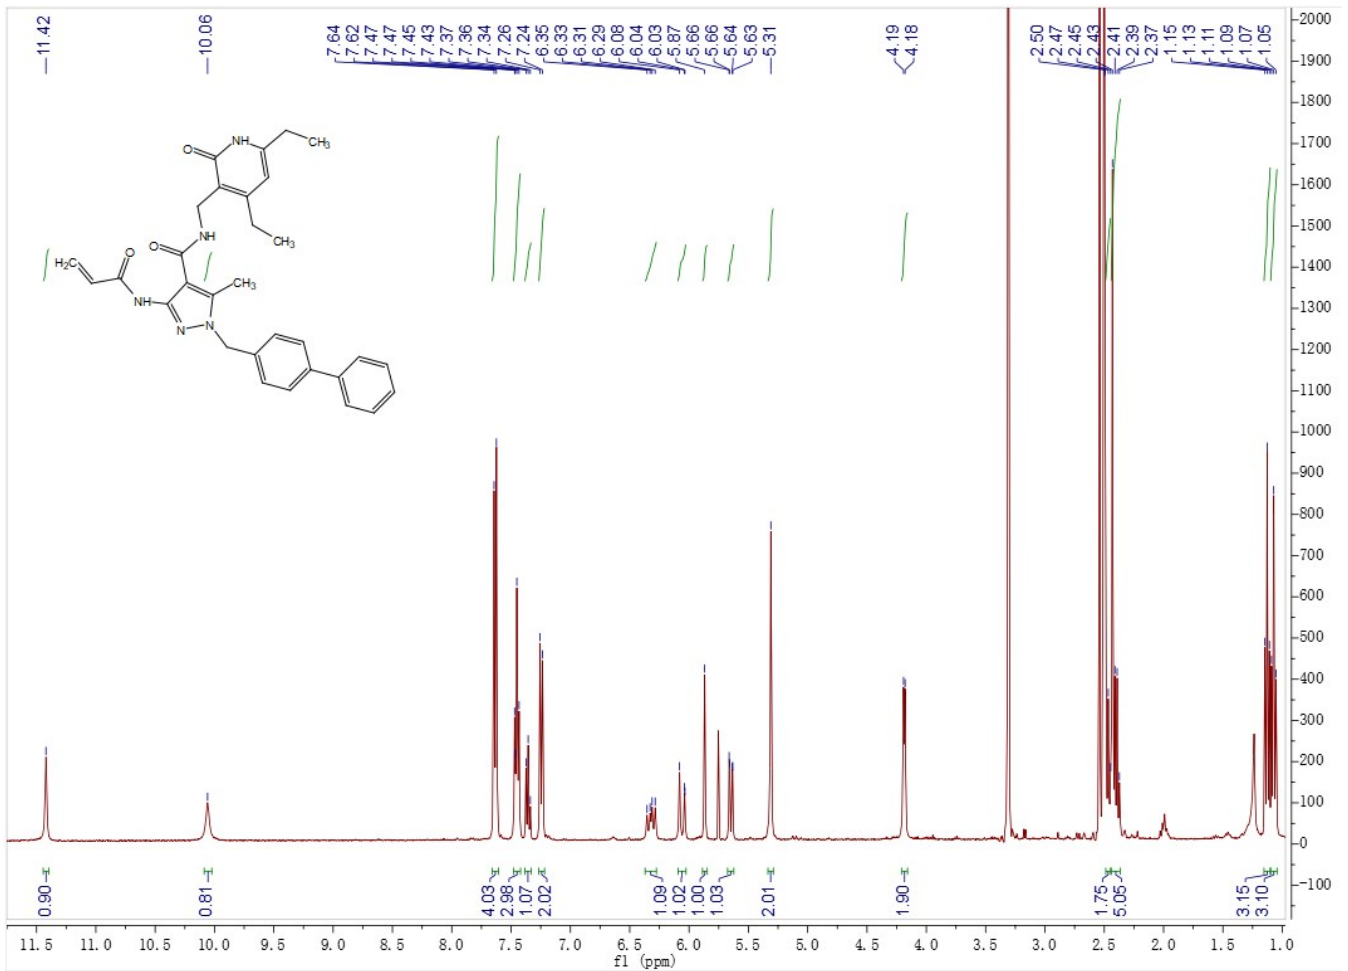

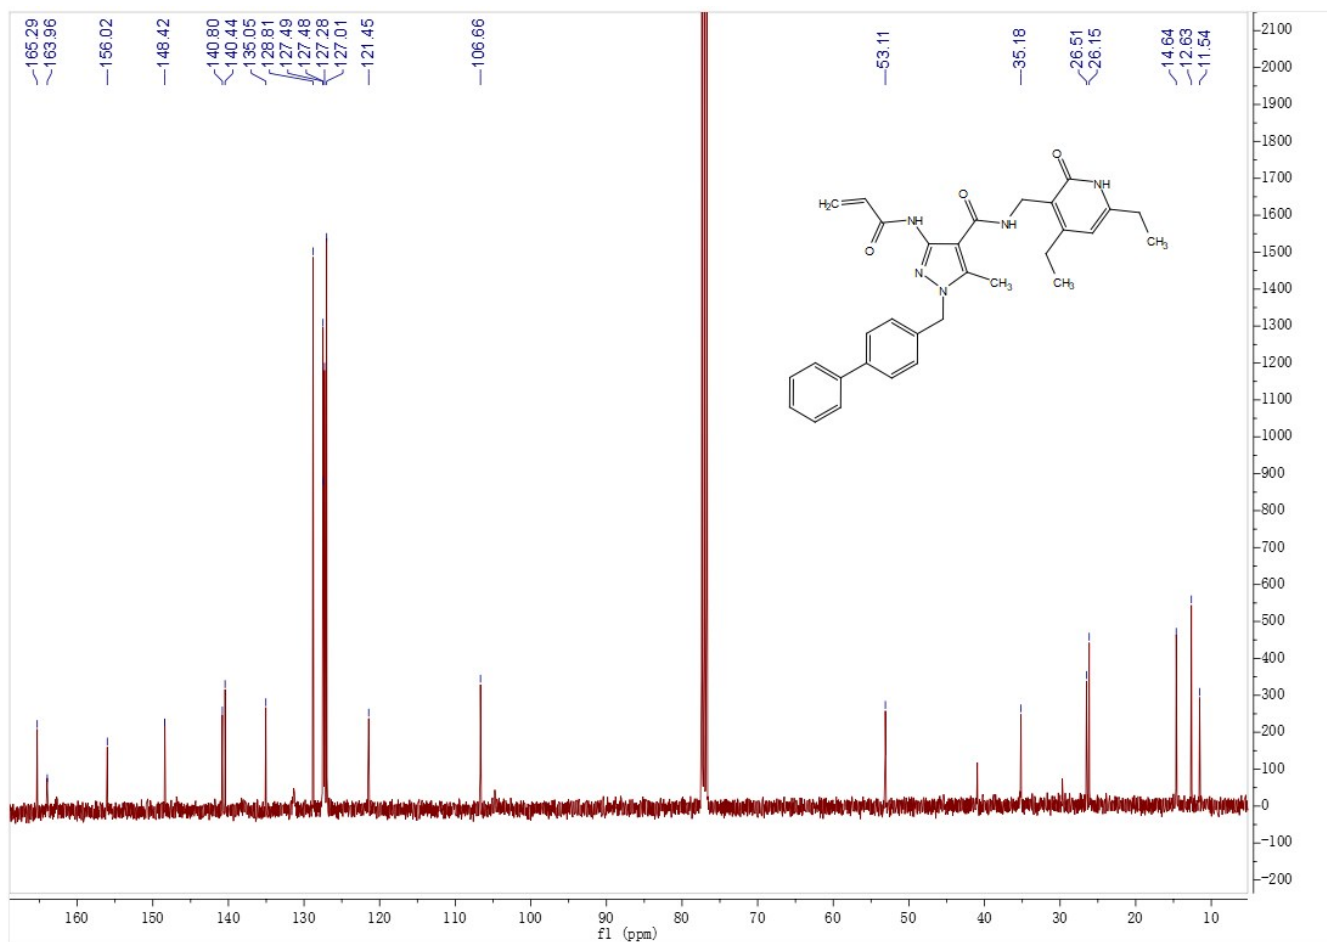

17:39:58  
180920\_ZQS03178 18 (0.308) Cm (4:23)

20-Sep-2018  
TOF MS ES+  
5.24e3

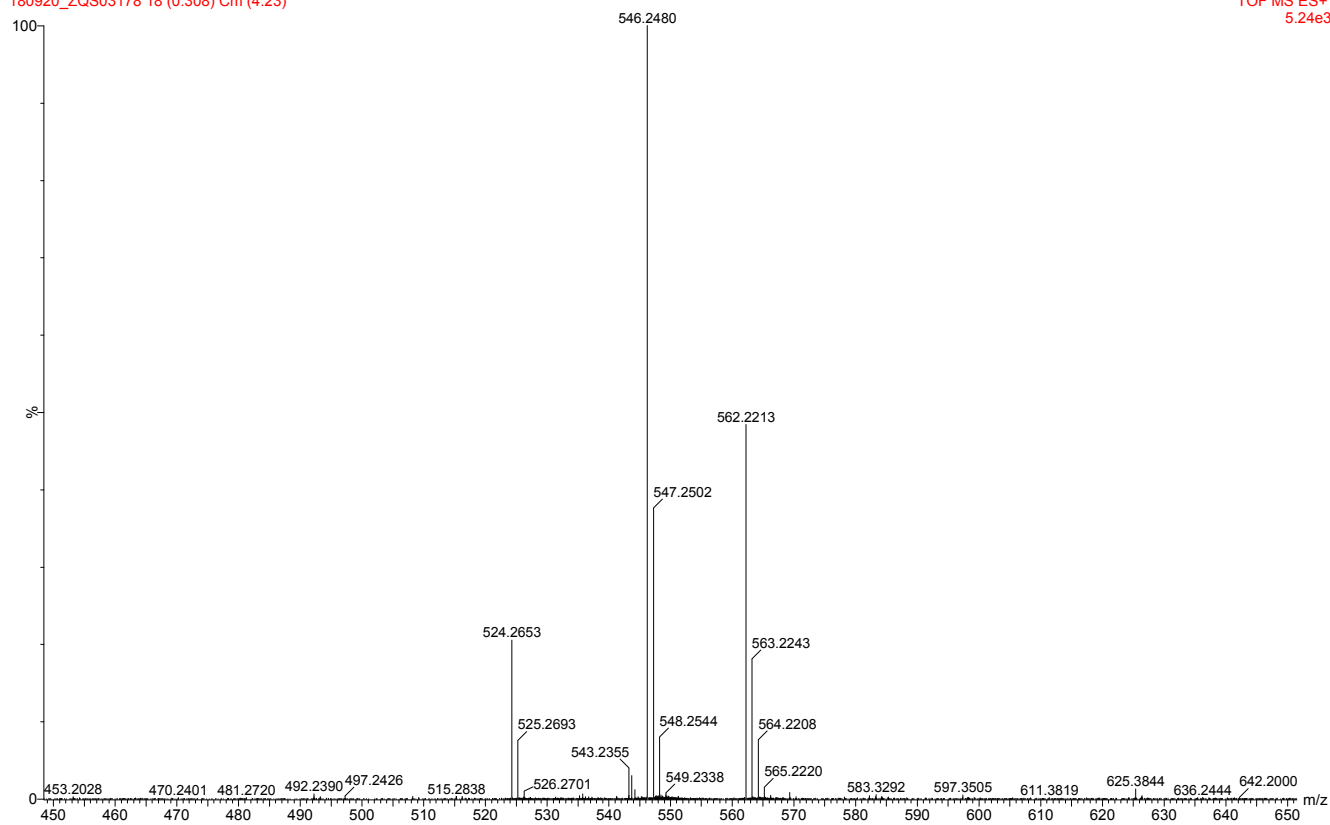

Compound **b15**

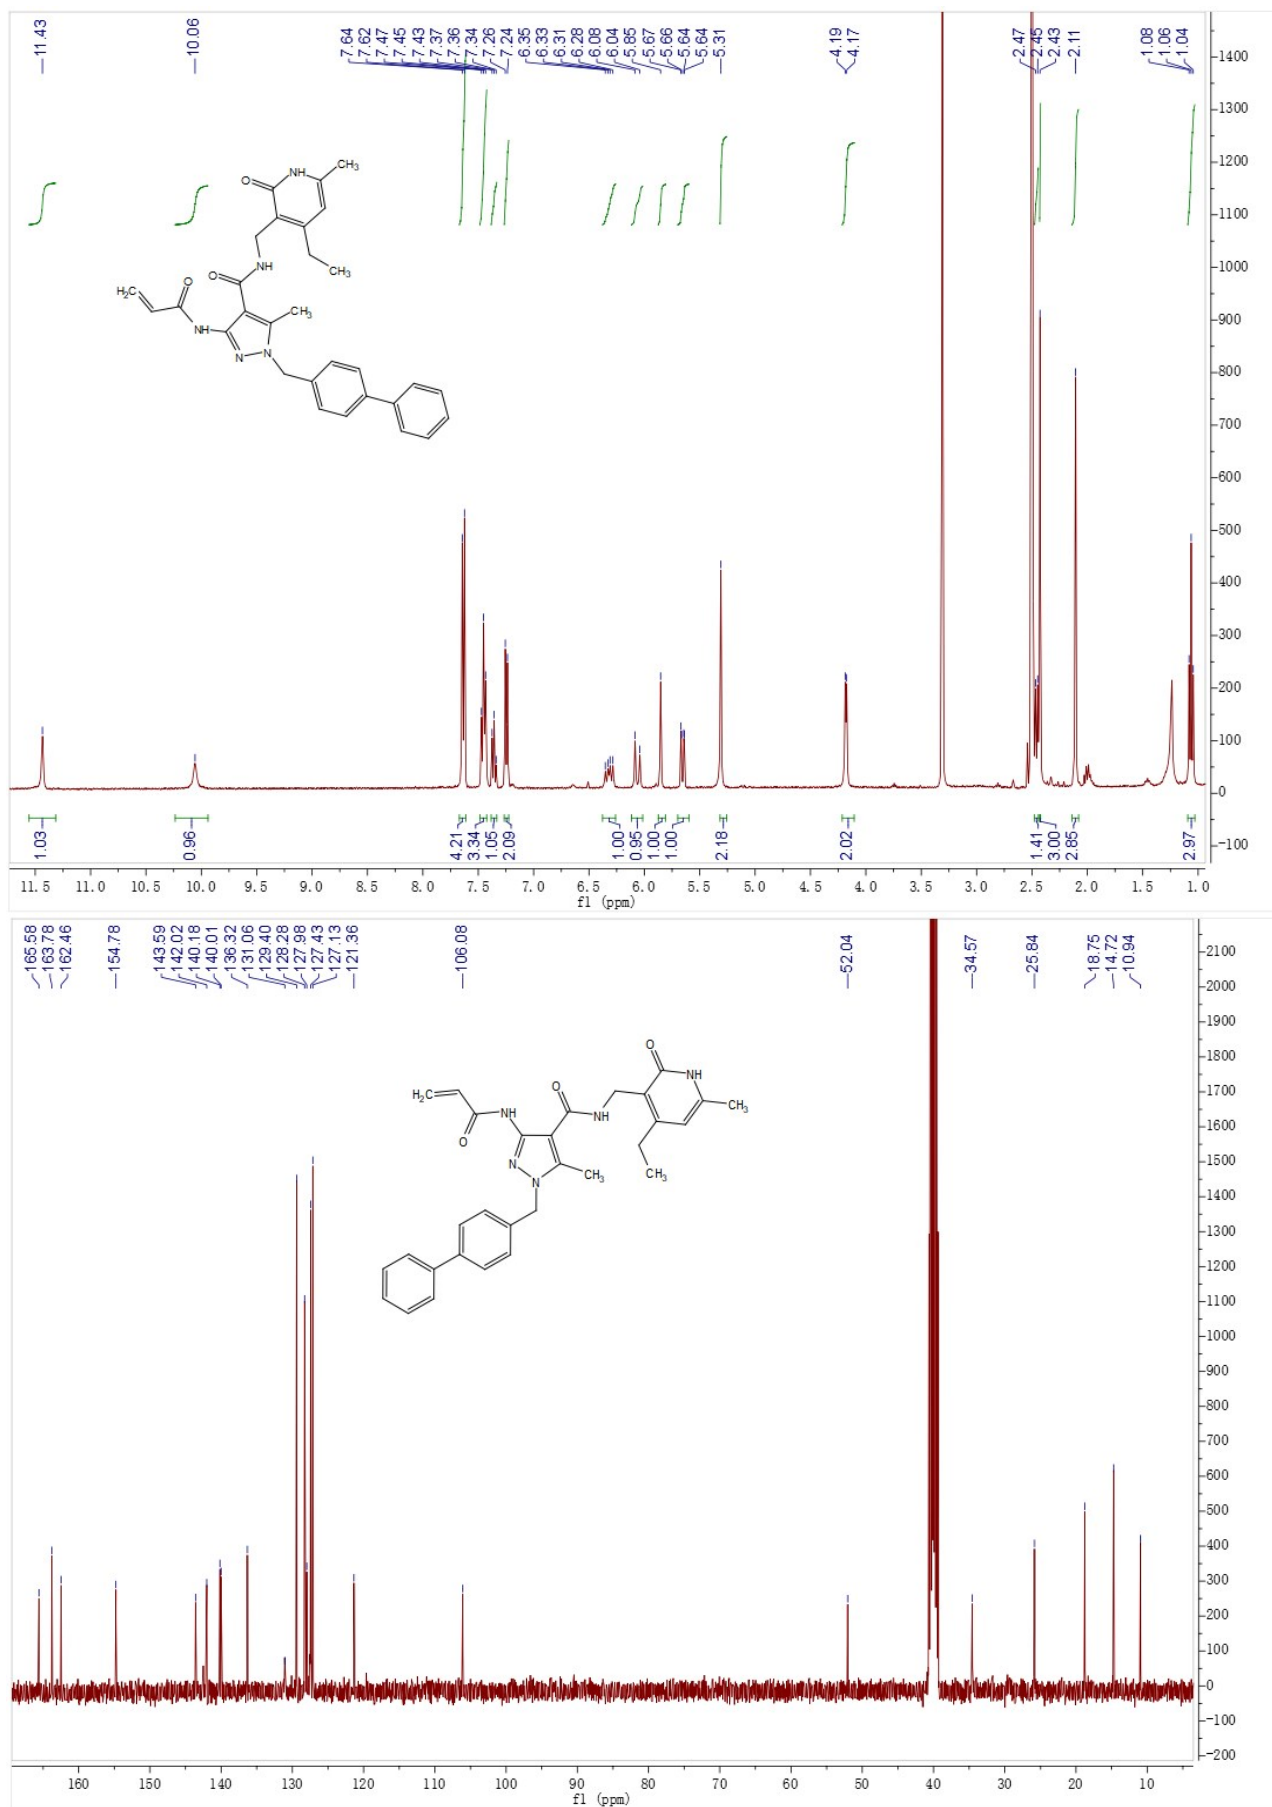

17:46:51

180920\_ZQS03182 2 (0.034) Cm (2:24)

20-Sep-2018

TOF MS ES+  
5.53e3

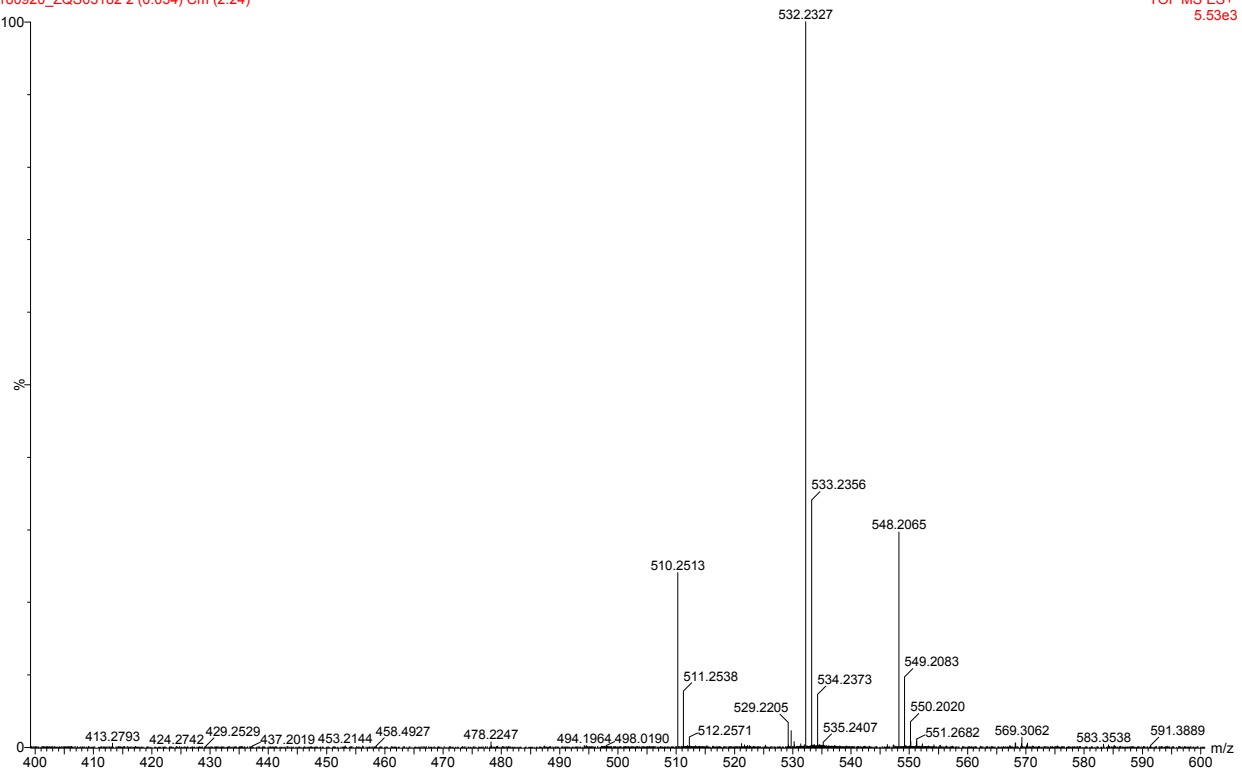

### Compound b1'

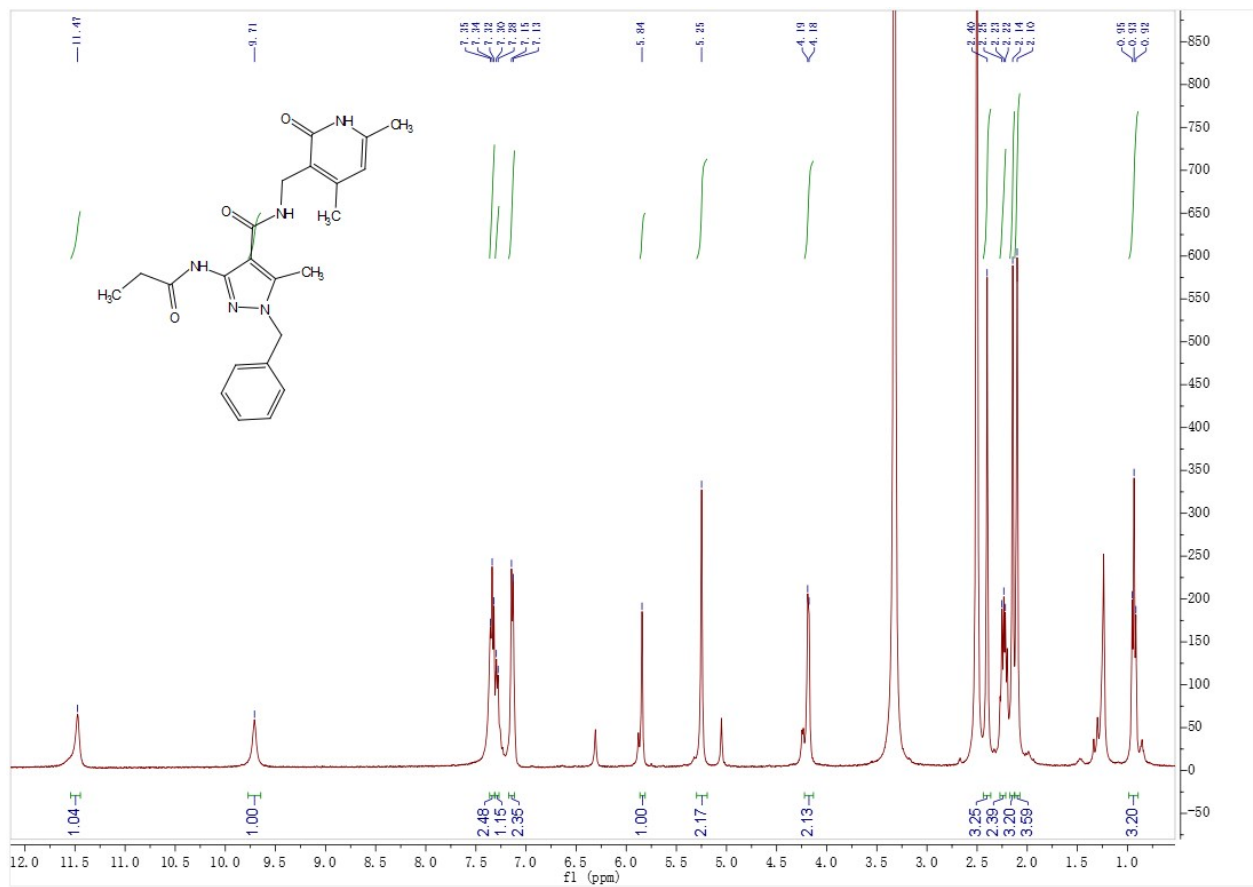



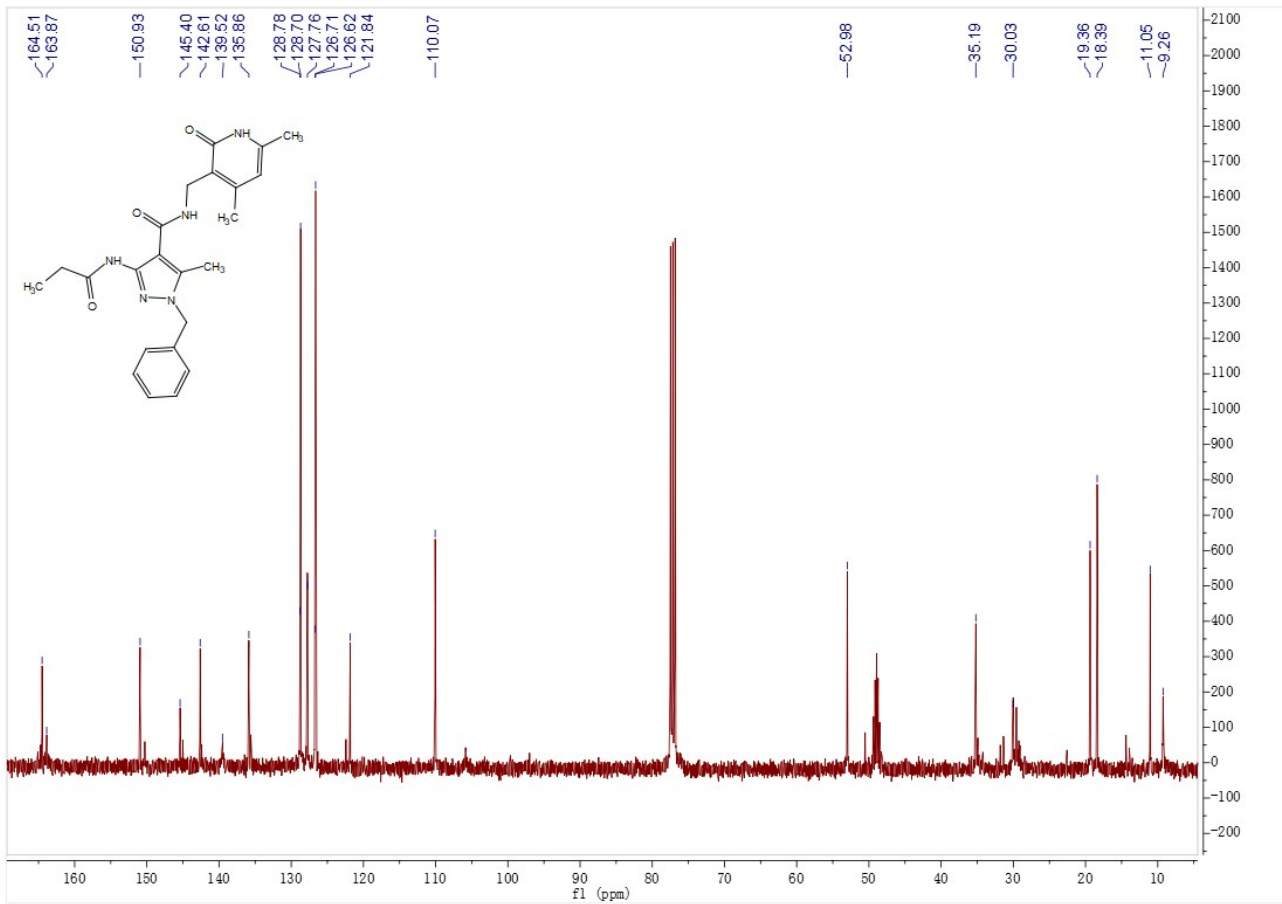

14:25:09  
191107\_03227 3 (0.051) Cm (2:24)

07-Nov-2019  
TOF MS ES+  
6.57e4

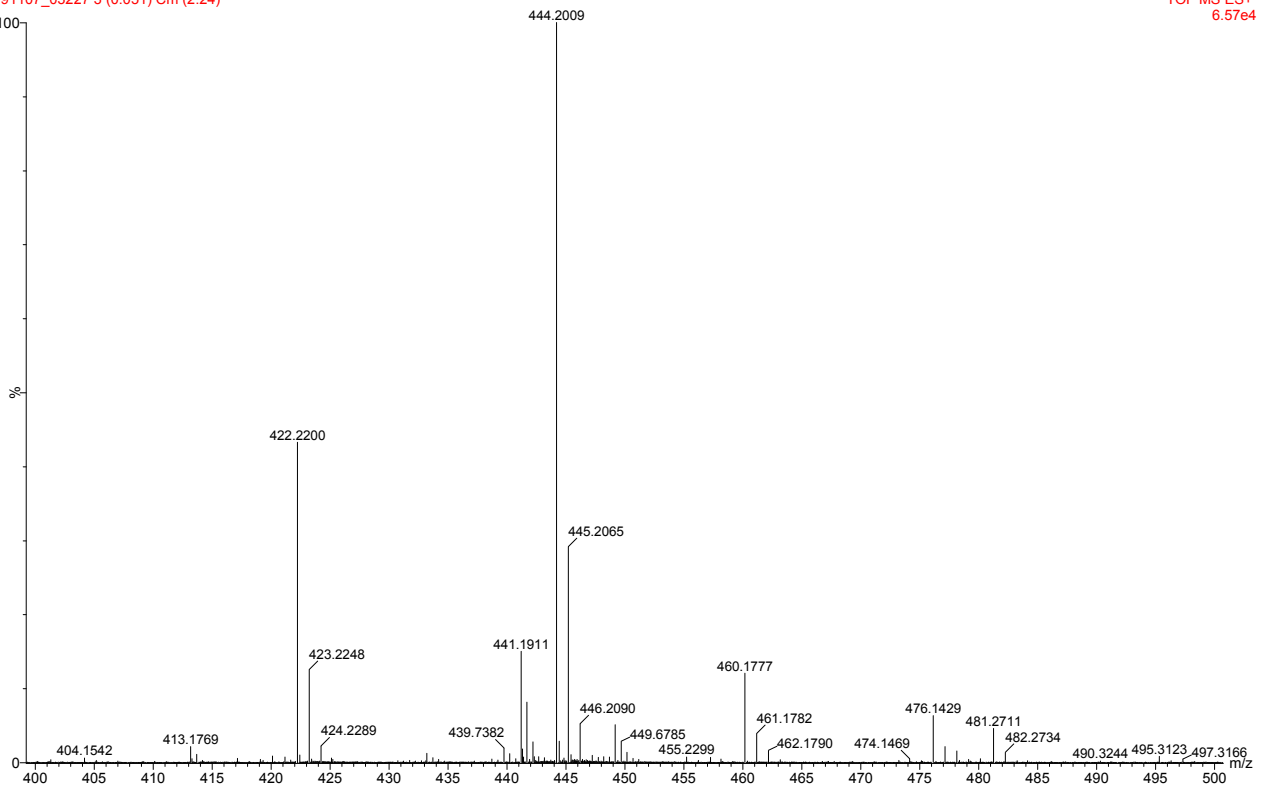

Compound SKLB-0335'

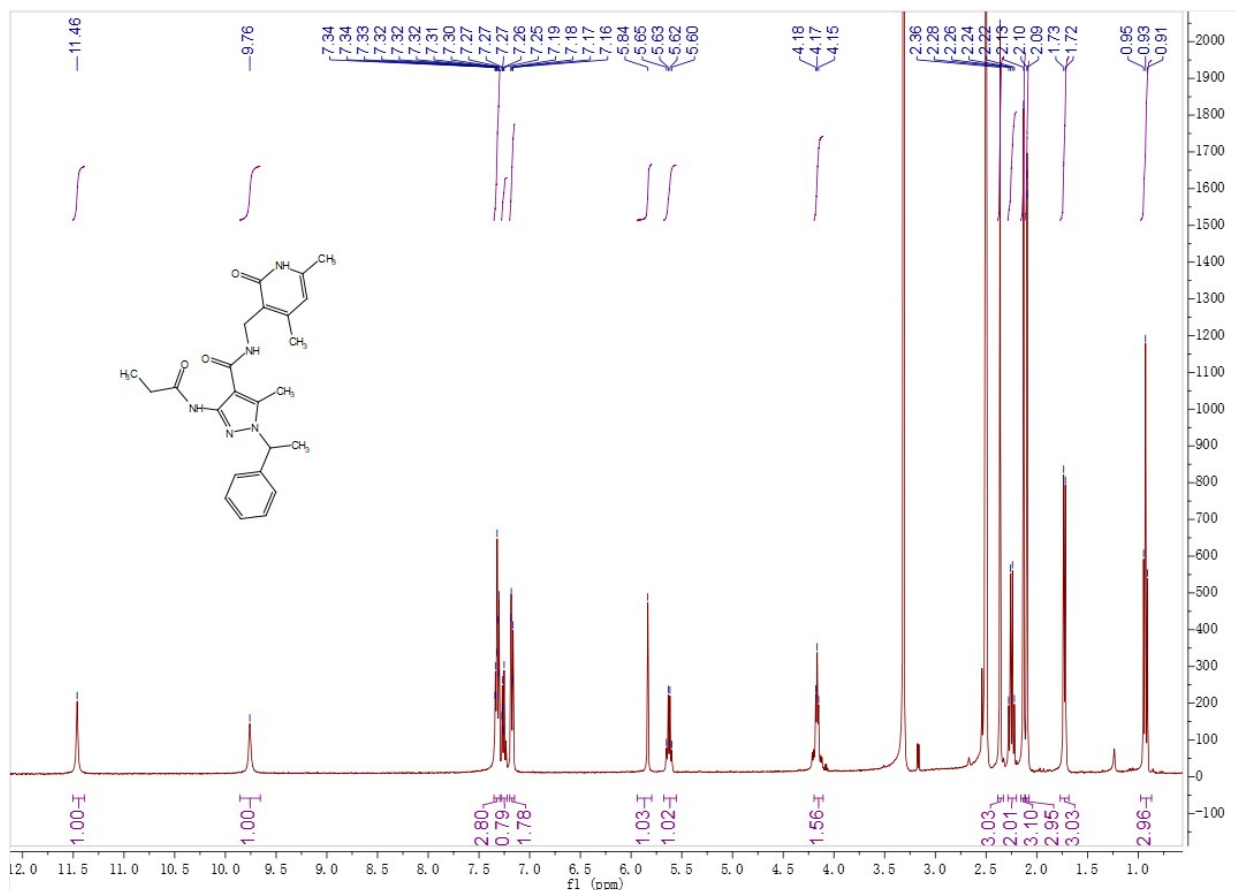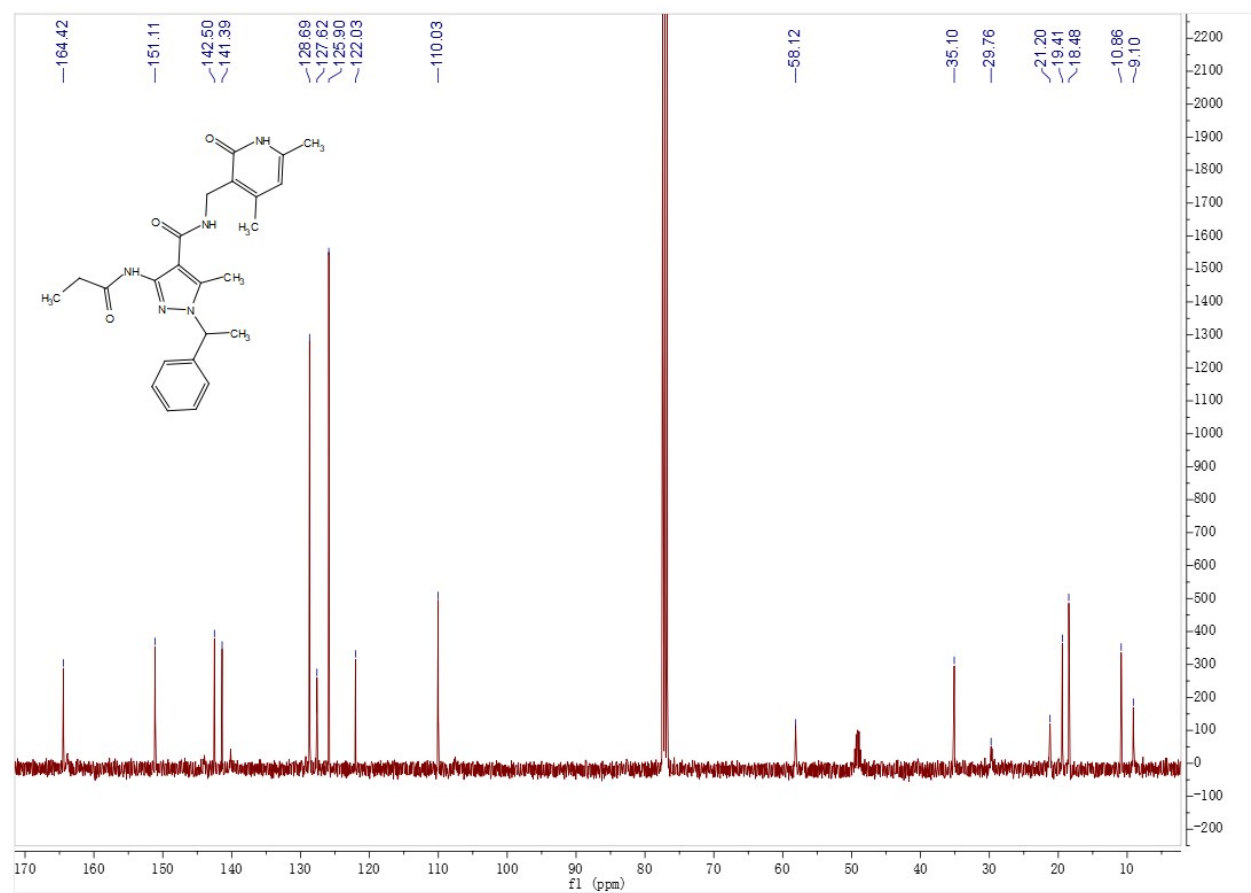

10:01:34

200425\_0392 20 (0.342) Cm (3:24)

25-Apr-2020

TOF MS ES+  
3.02e4

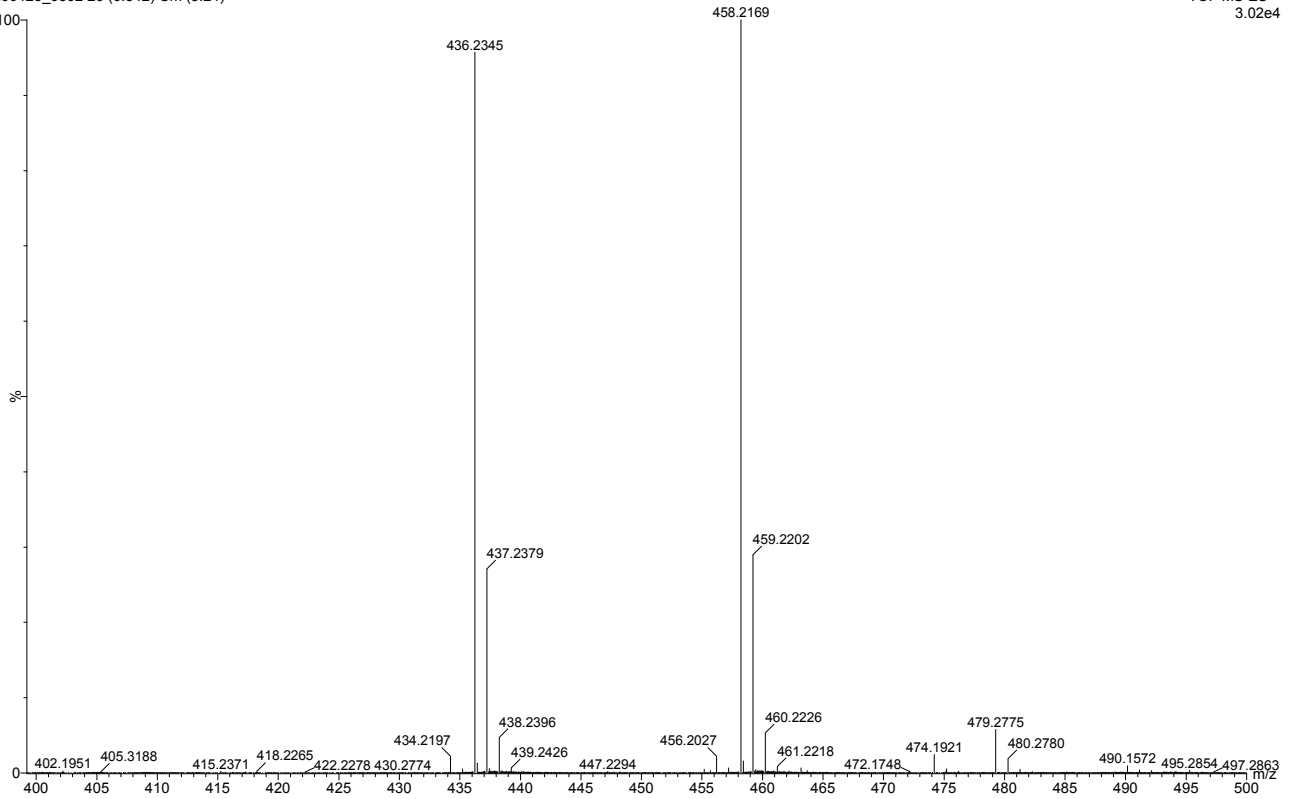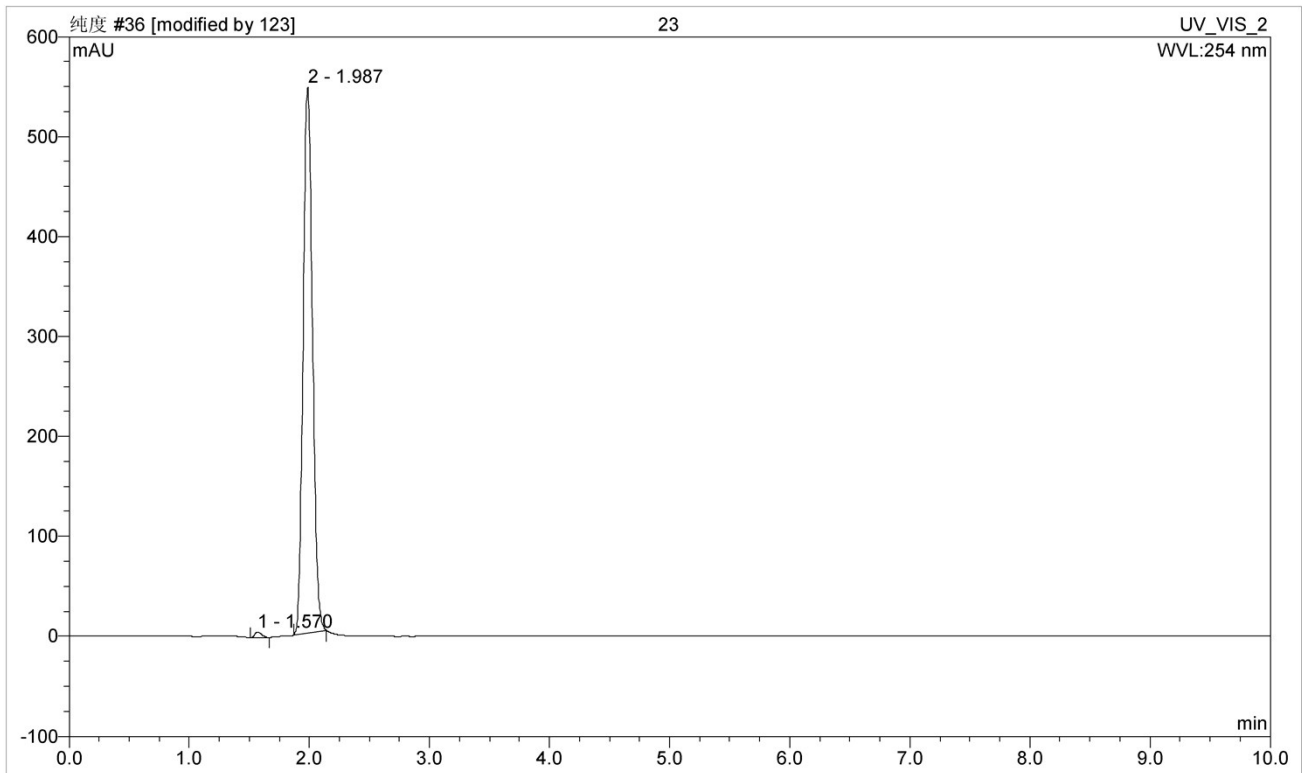

| No.           | Ret.Time<br>min | Peak Name | Height<br>mAU | Area<br>mAU*min | Rel.Area<br>% | Amount | Type |
|---------------|-----------------|-----------|---------------|-----------------|---------------|--------|------|
| 1             | 1.57            | n.a.      | 5.726         | 0.389           | 0.78          | n.a.   | BMB* |
| 2             | 1.99            | n.a.      | 546.127       | 49.464          | 99.22         | n.a.   | BMB* |
| <b>Total:</b> |                 |           | 551.853       | 49.853          | 100.00        | 0.000  |      |

Compound (S)-b4

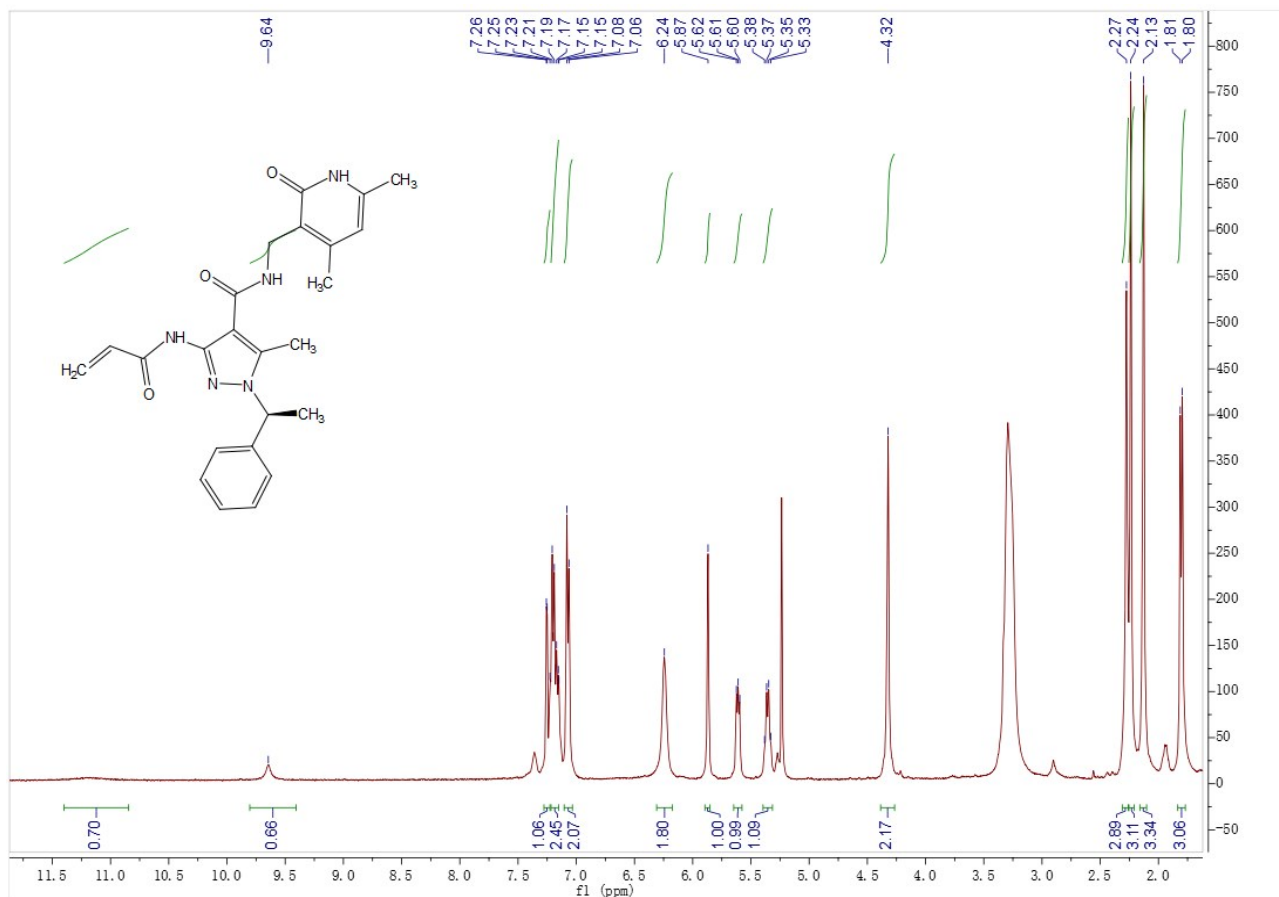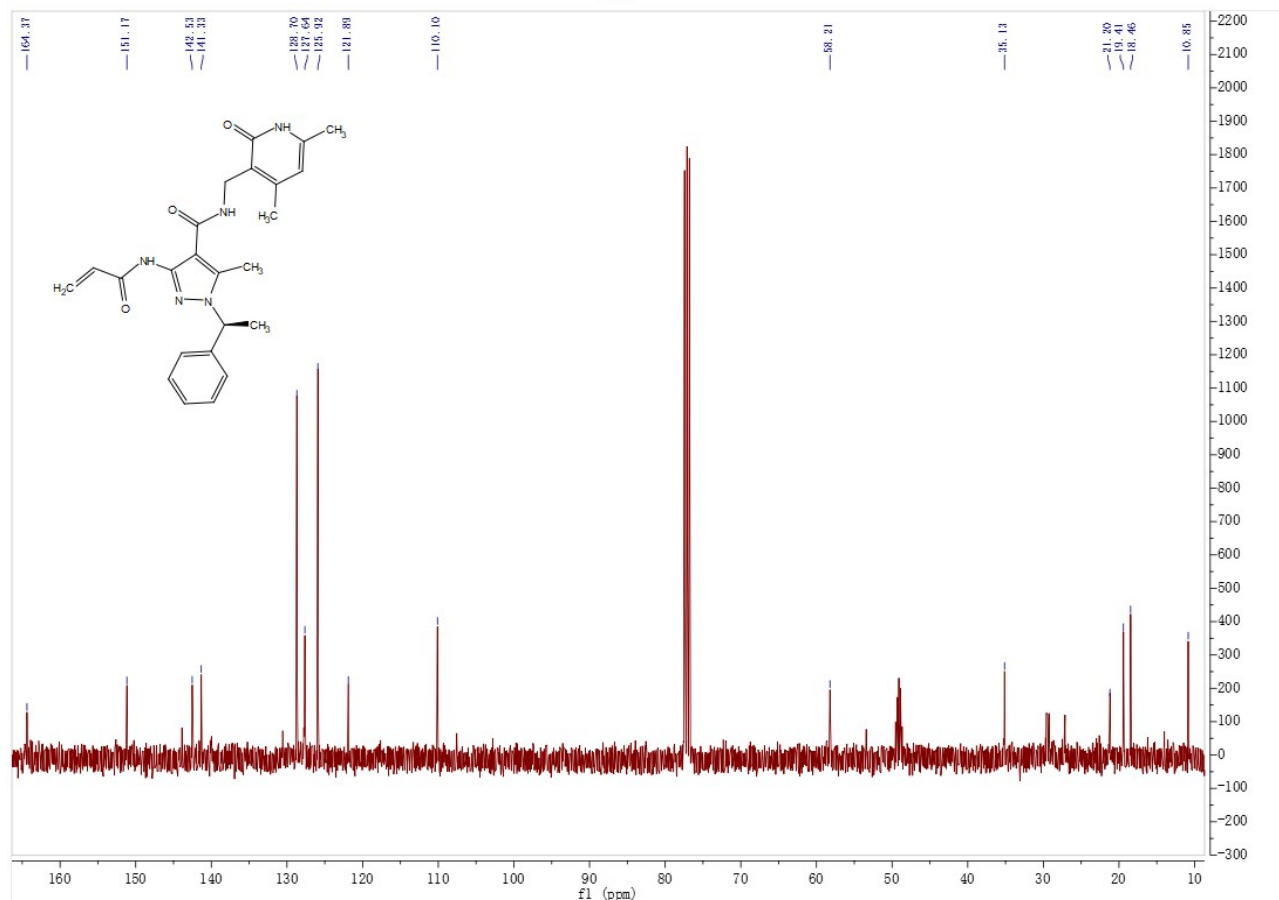

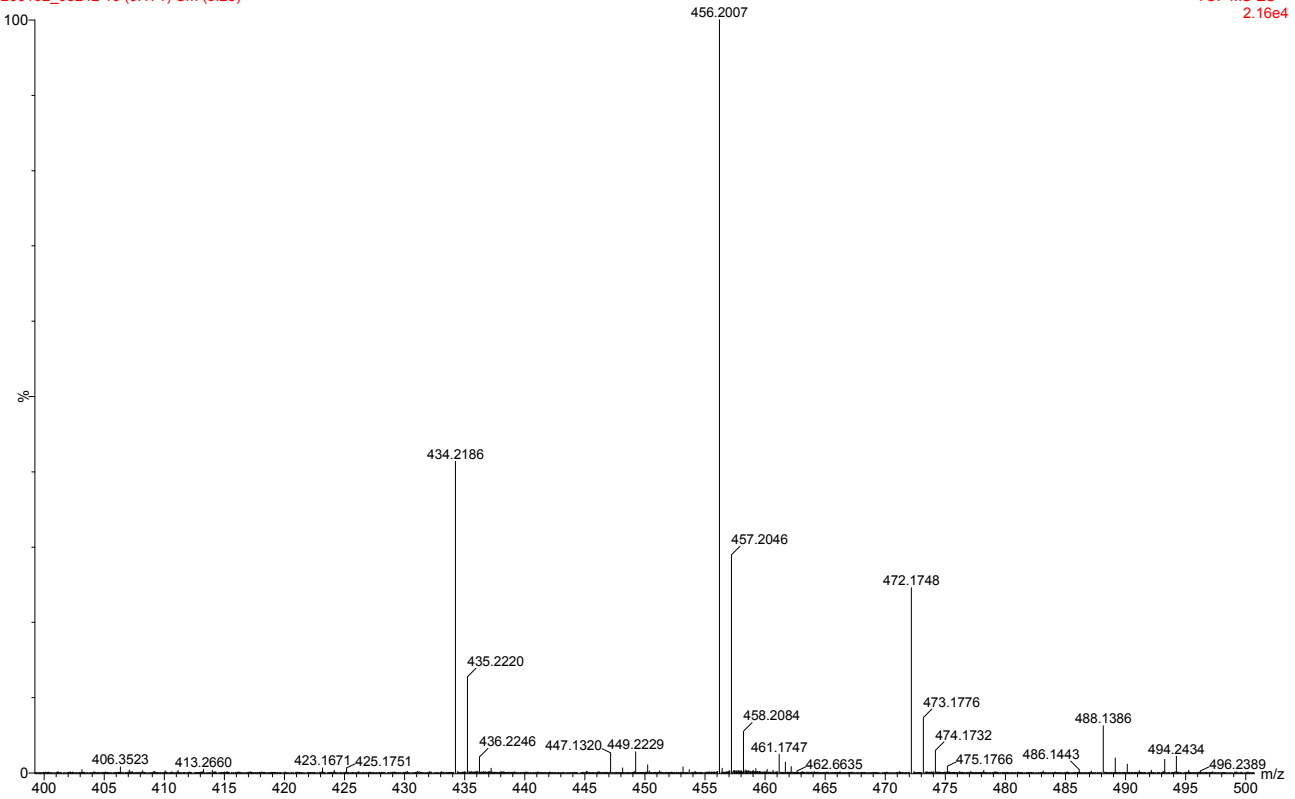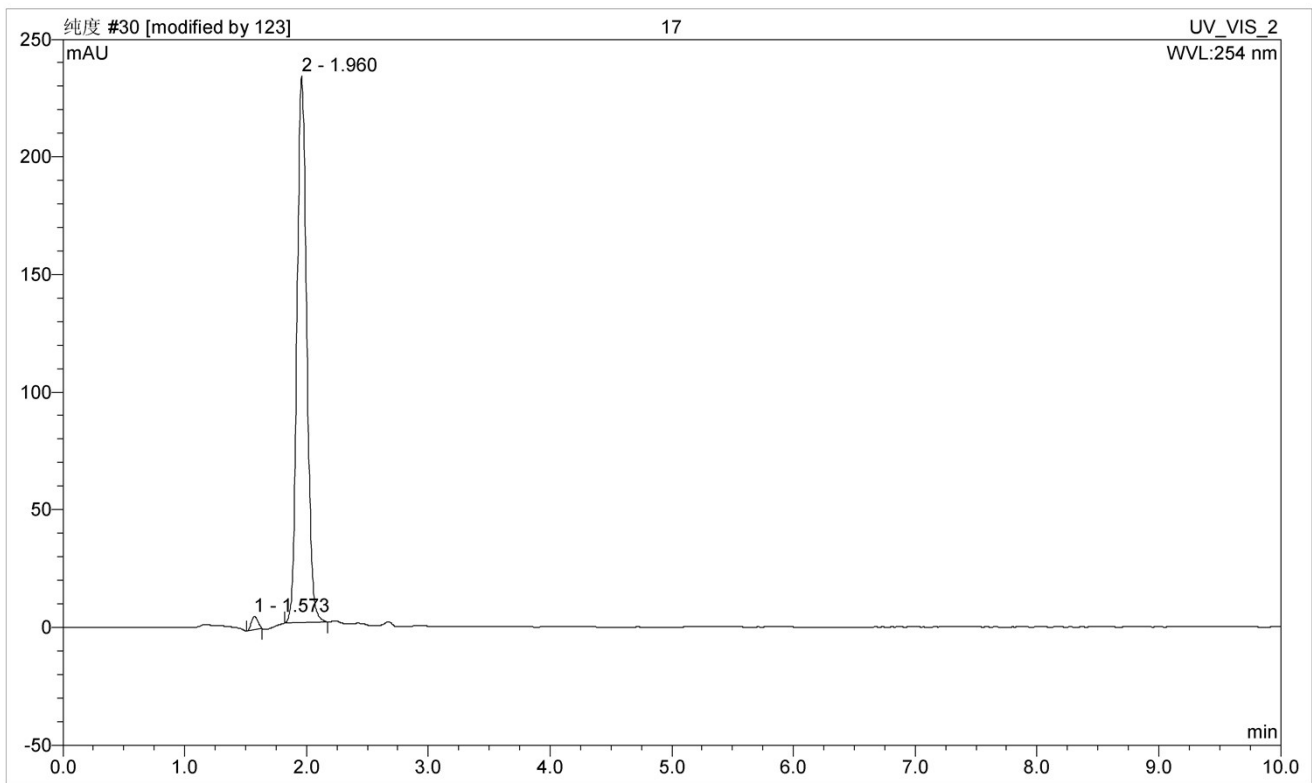

| No.           | Ret.Time<br>min | Peak Name | Height<br>mAU | Area<br>mAU*min | Rel.Area<br>% | Amount | Type |
|---------------|-----------------|-----------|---------------|-----------------|---------------|--------|------|
| 1             | 1.57 n.a.       |           | 5.496         | 0.340           | 1.56          | n.a.   | BMB* |
| 2             | 1.96 n.a.       |           | 232.423       | 21.434          | 98.44         | n.a.   | BMB* |
| <b>Total:</b> |                 |           | 237.919       | 21.774          | 100.00        | 0.000  |      |

Compound (R)-b4

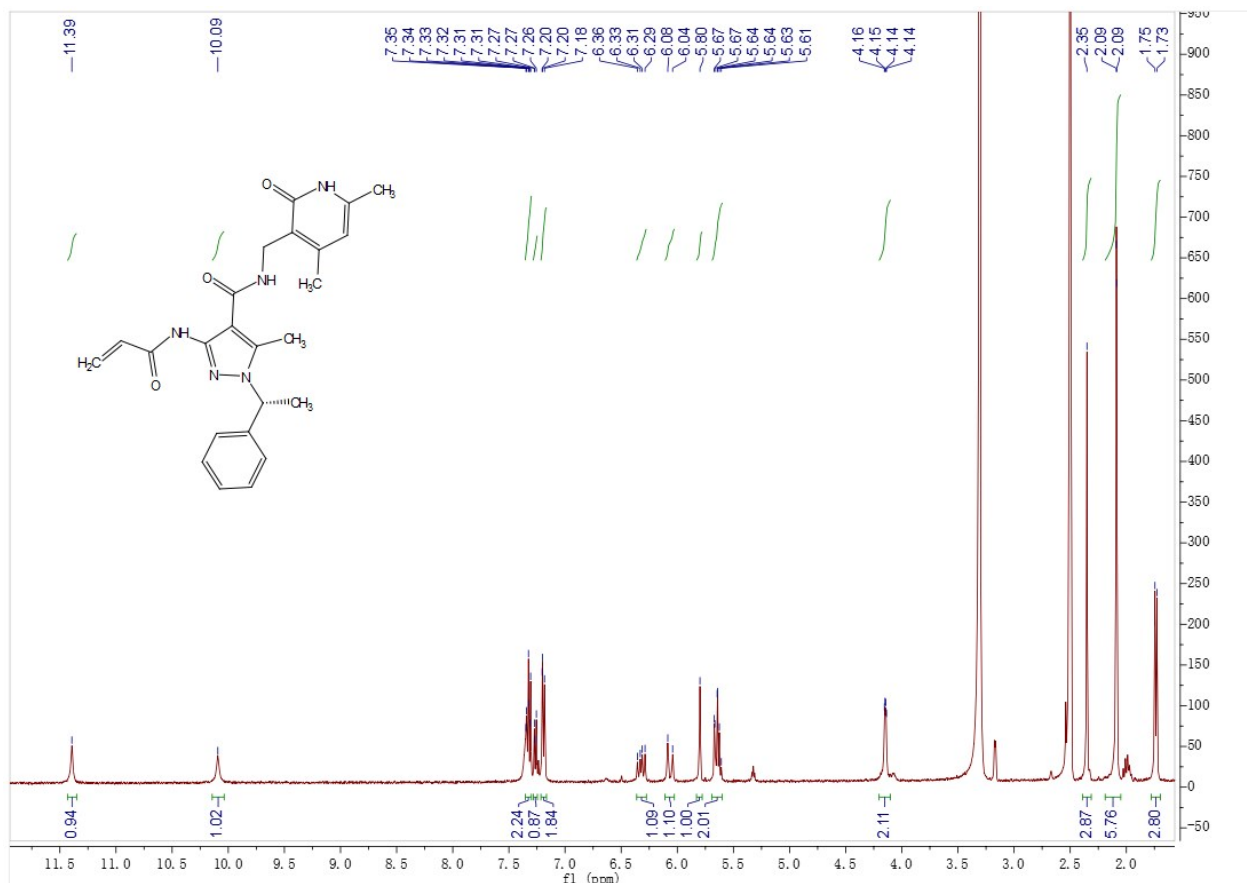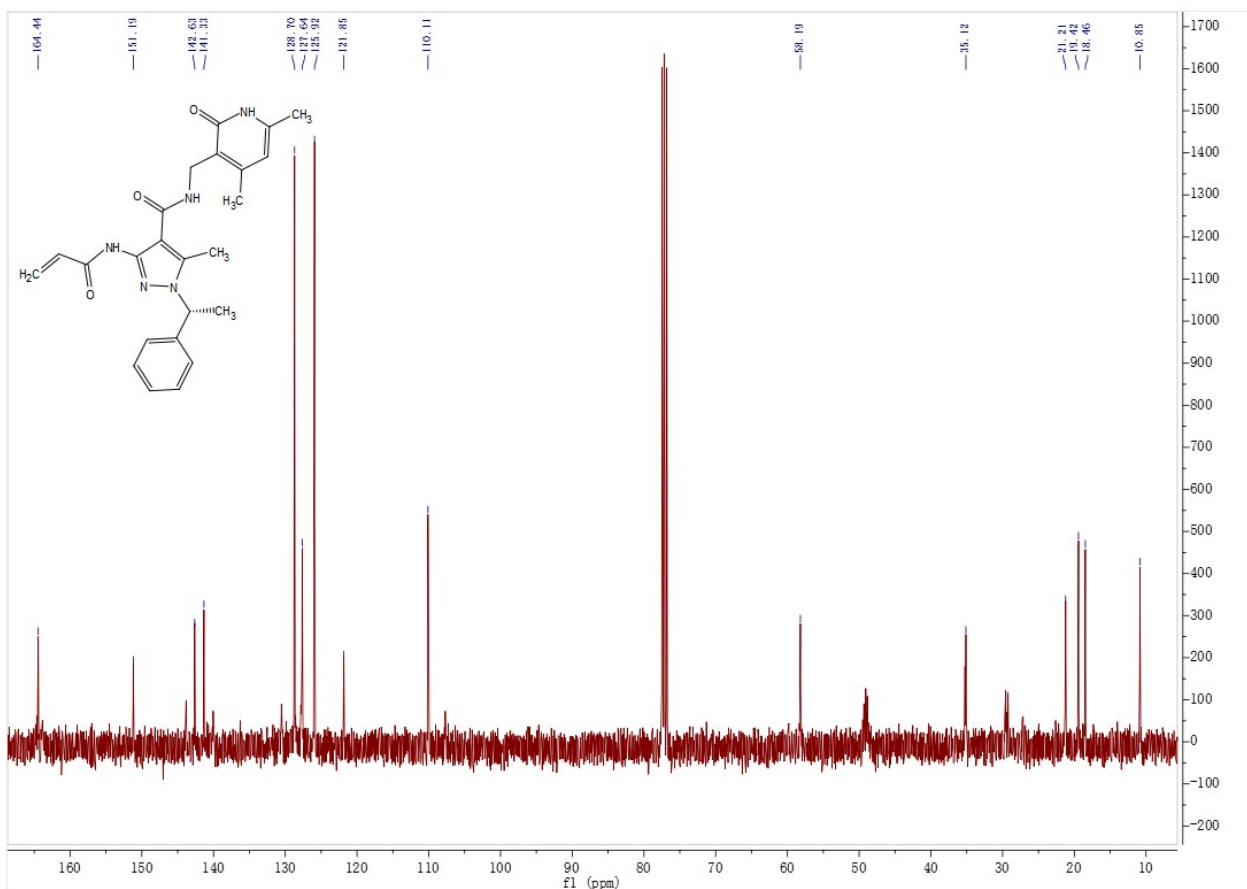

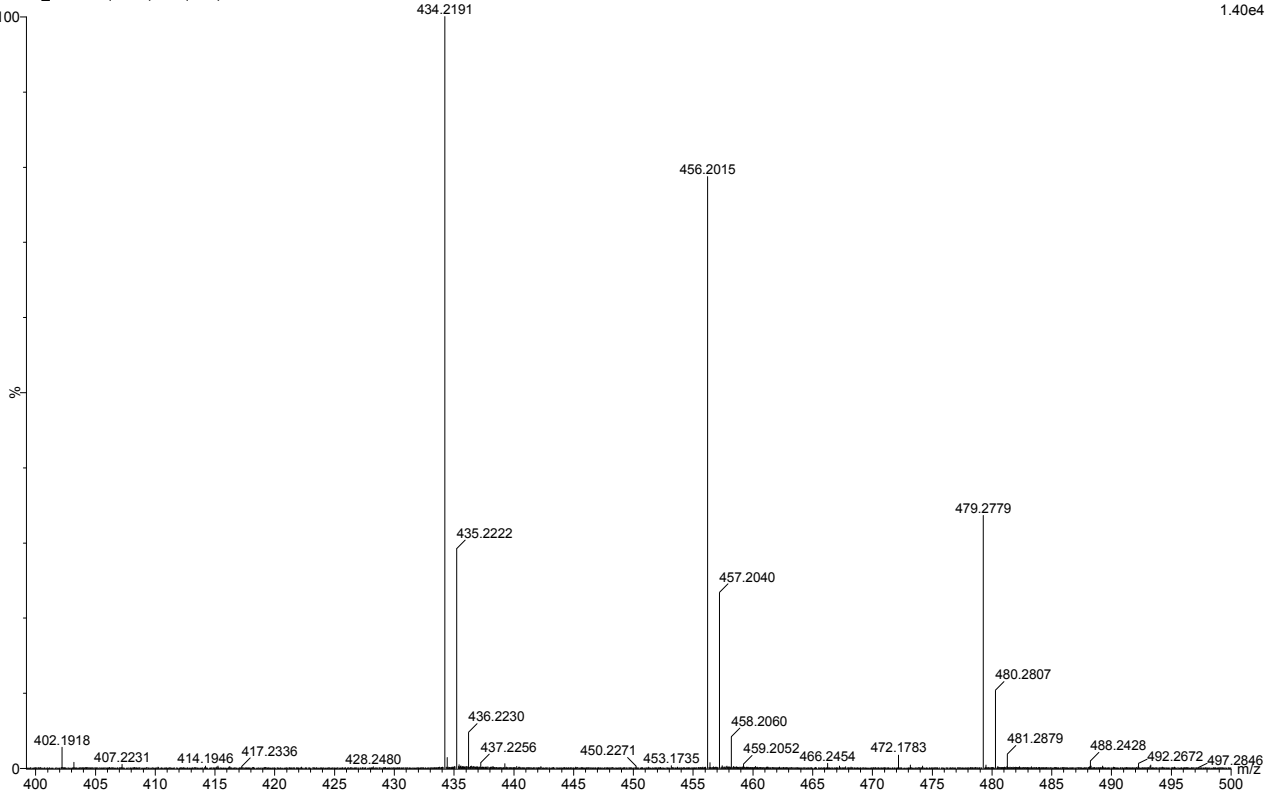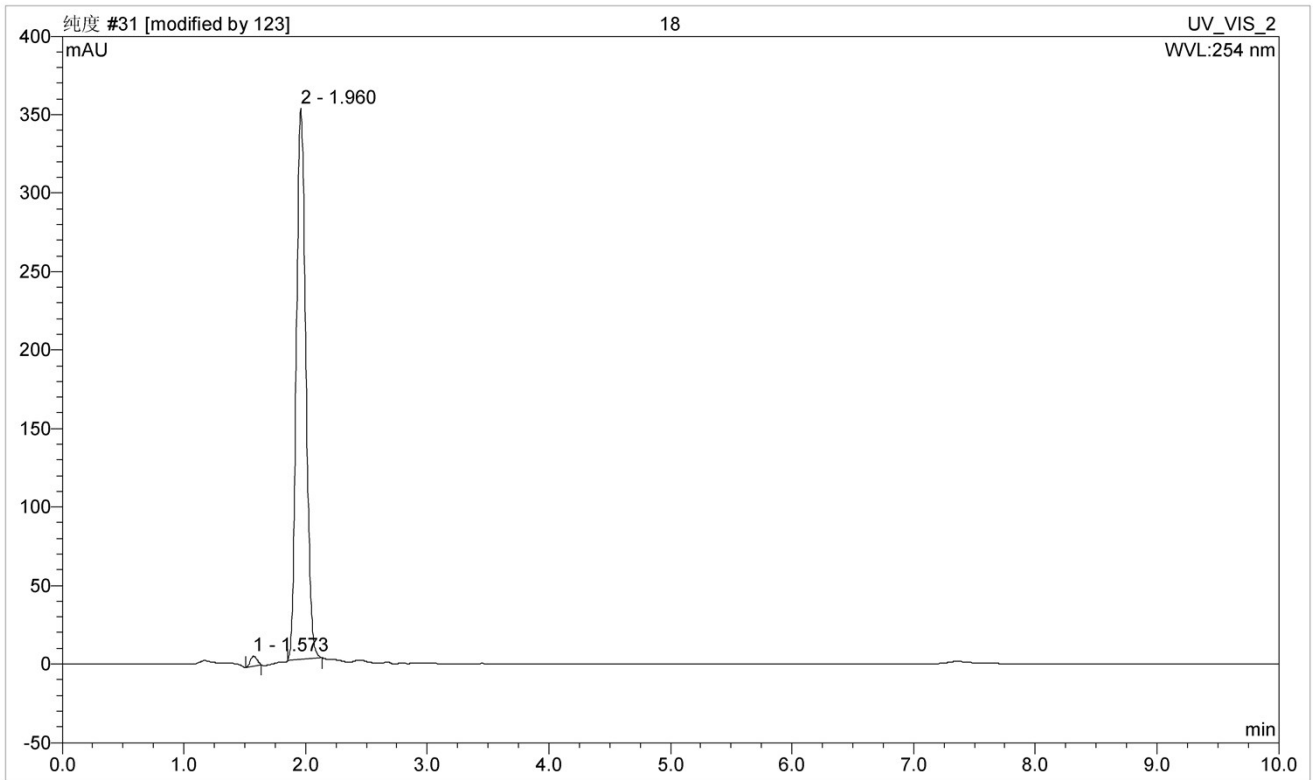

| No.           | Ret.Time<br>min | Peak Name | Height<br>mAU | Area<br>mAU*min | Rel.Area<br>% | Amount | Type |
|---------------|-----------------|-----------|---------------|-----------------|---------------|--------|------|
| 1             | 1.57            | n.a.      | 6.242         | 0.388           | 1.22          | n.a.   | BMB* |
| 2             | 1.96            | n.a.      | 351.049       | 31.581          | 98.78         | n.a.   | BMB* |
| <b>Total:</b> |                 |           | 357.290       | 31.969          | 100.00        | 0.000  |      |

Compound c1

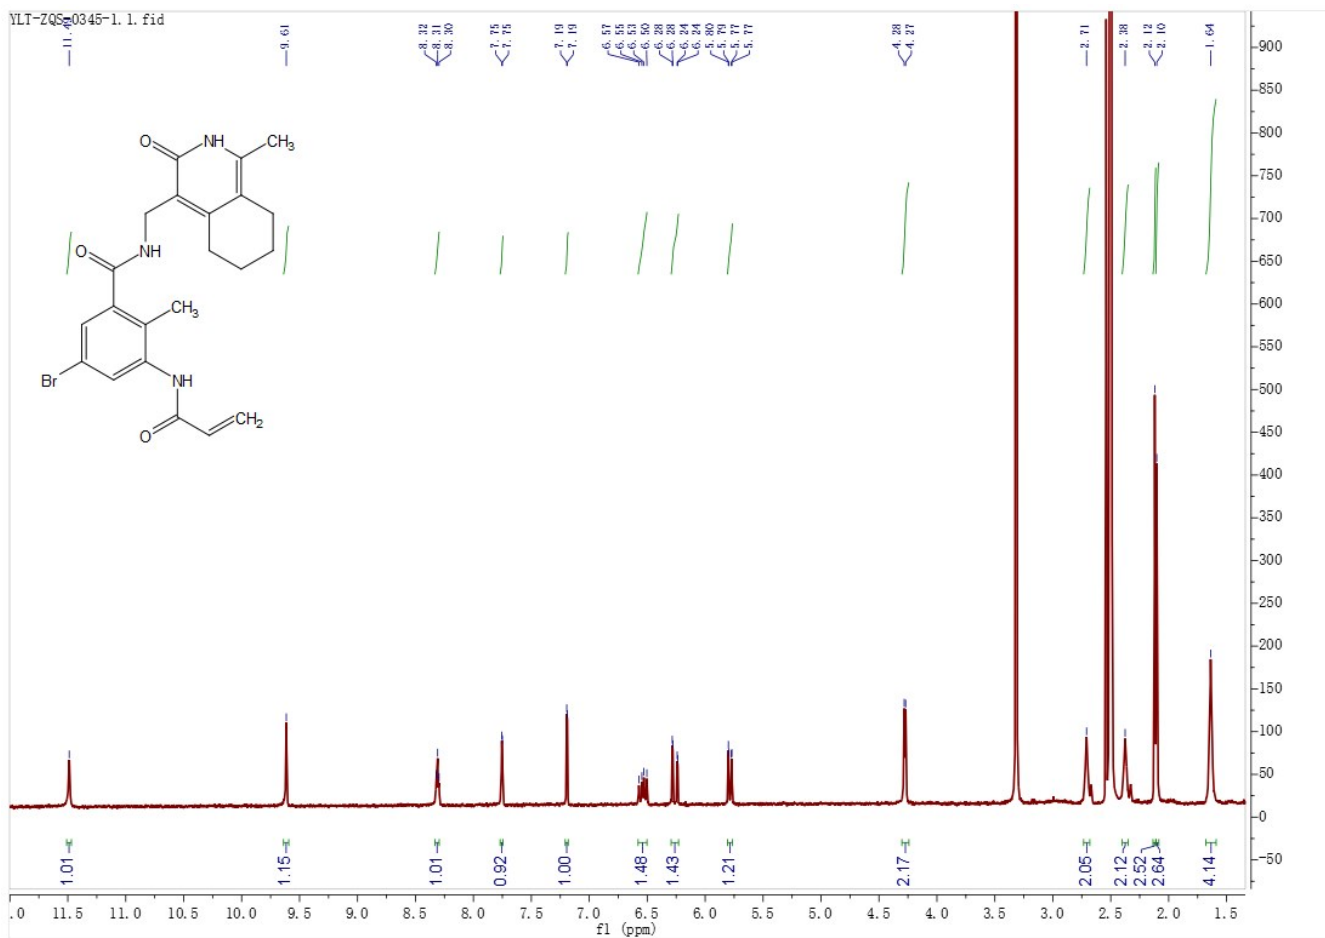

10:07:30  
200425\_0345 17 (0.291) Cm (4:24)

25-Apr-2020  
TOF MS ES+  
1.07e4

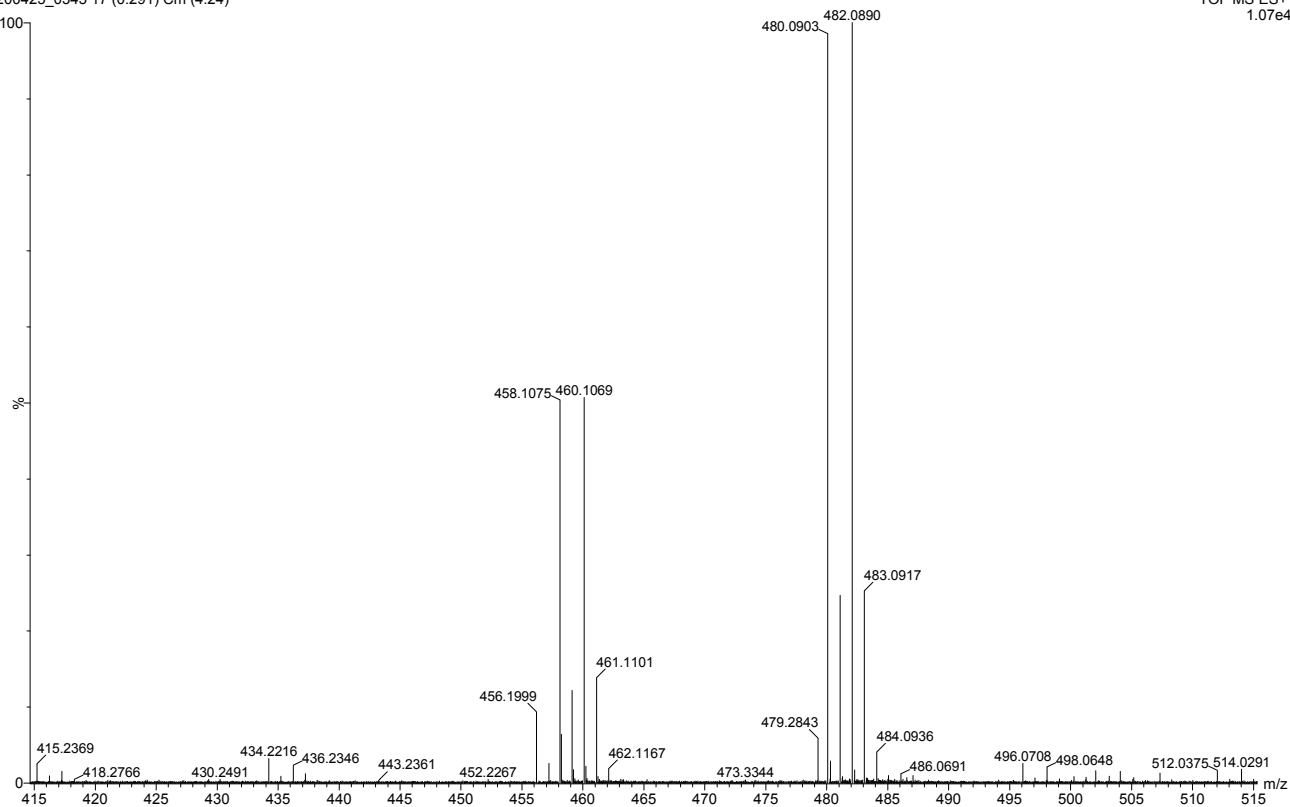





10:05:23

200425\_0371 12 (0.205) Cm (4:24)

25-Apr-2020

TOF MS ES+  
3.69e4

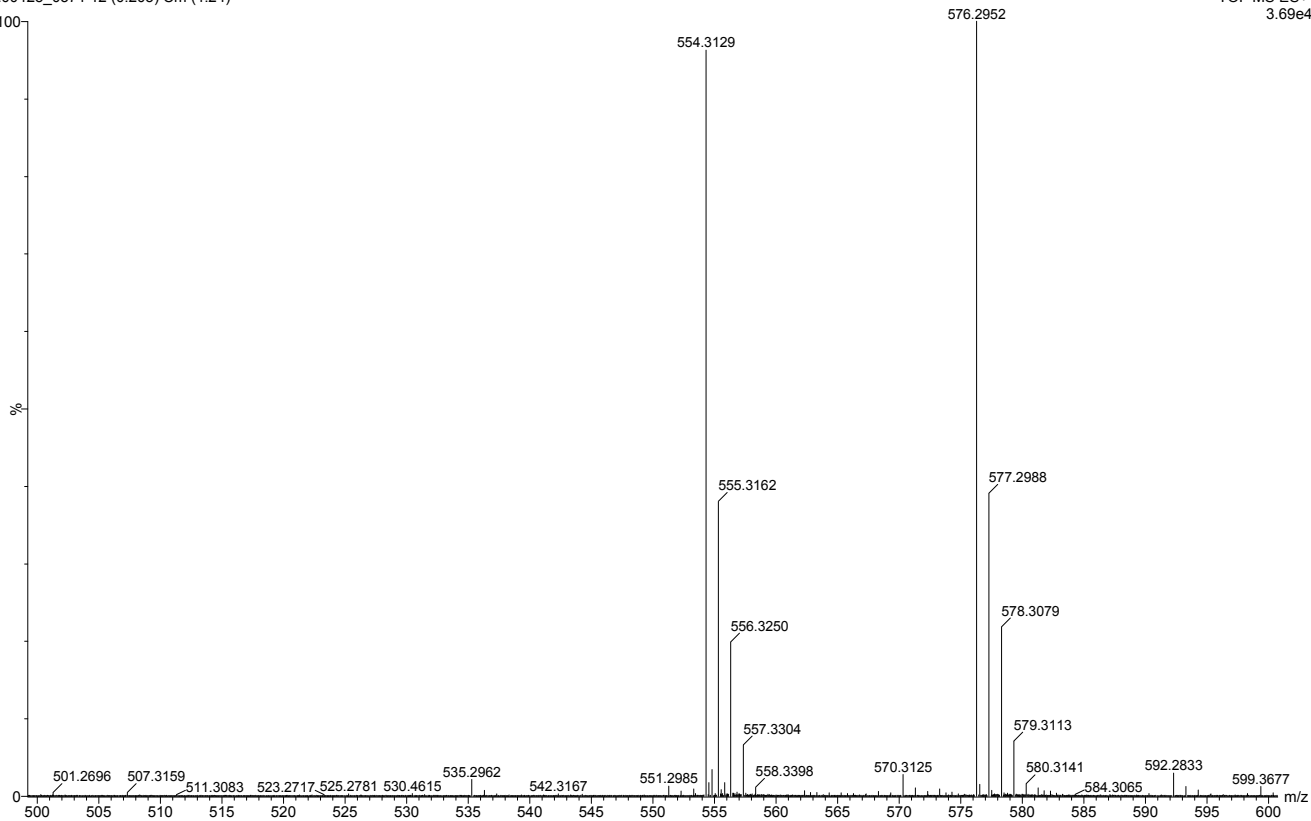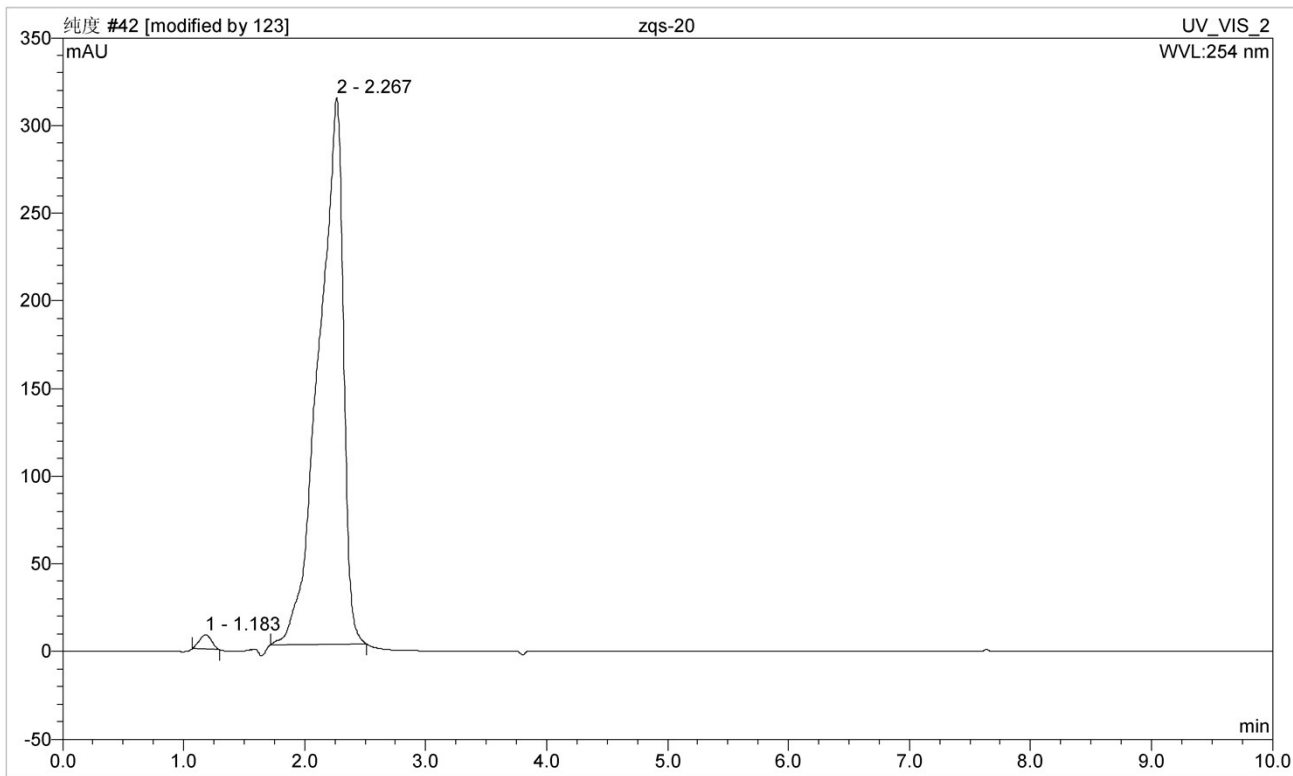

| No.           | Ret.Time<br>min | Peak Name | Height<br>mAU | Area<br>mAU*min | Rel.Area<br>% | Amount | Type |
|---------------|-----------------|-----------|---------------|-----------------|---------------|--------|------|
| 1             | 1.18            | n.a.      | 8.137         | 0.952           | 1.28          | n.a.   | BMB* |
| 2             | 2.27            | n.a.      | 311.563       | 73.245          | 98.72         | n.a.   | BMB* |
| <b>Total:</b> |                 |           | 319.699       | 74.197          | 100.00        | 0.000  |      |

Compound **c2'**

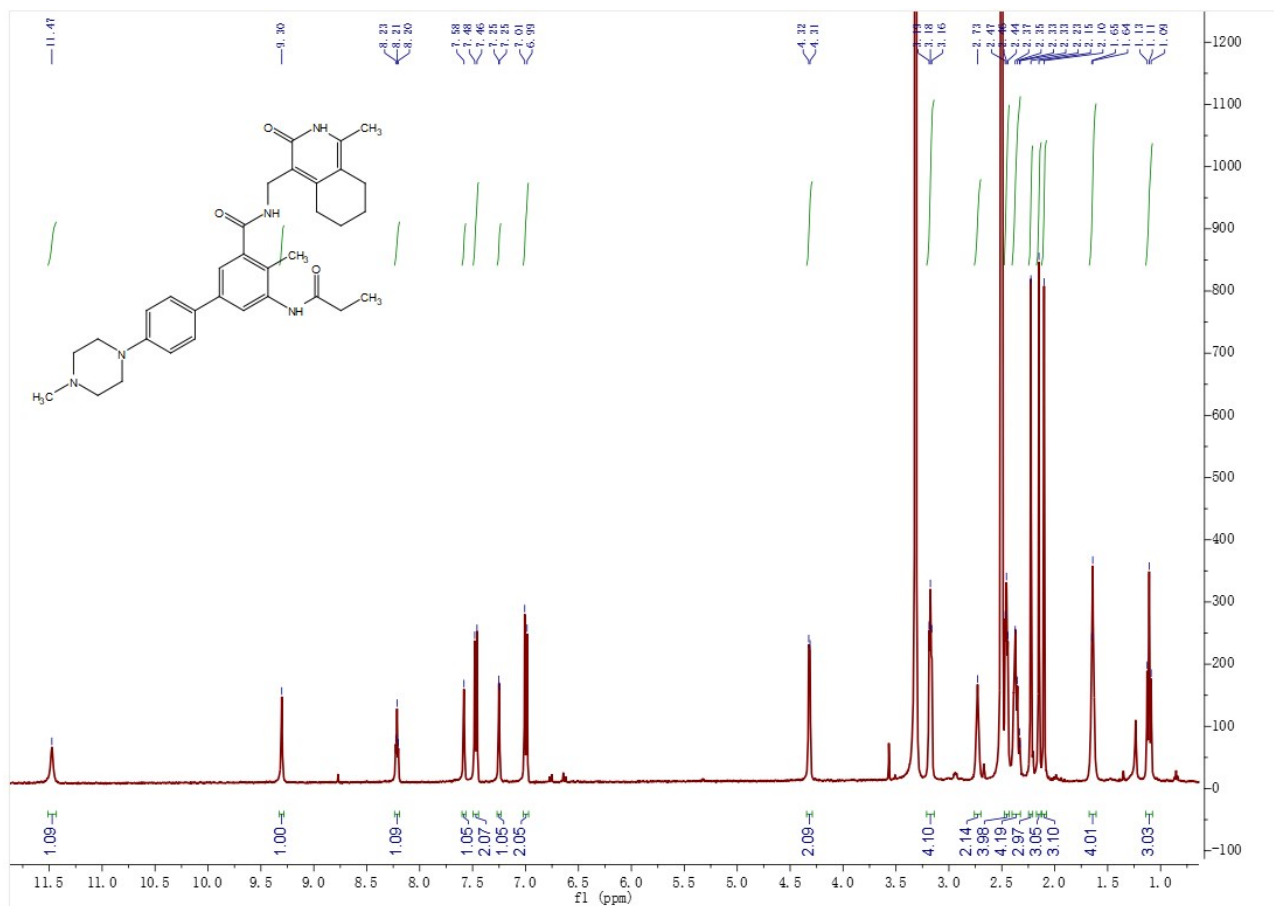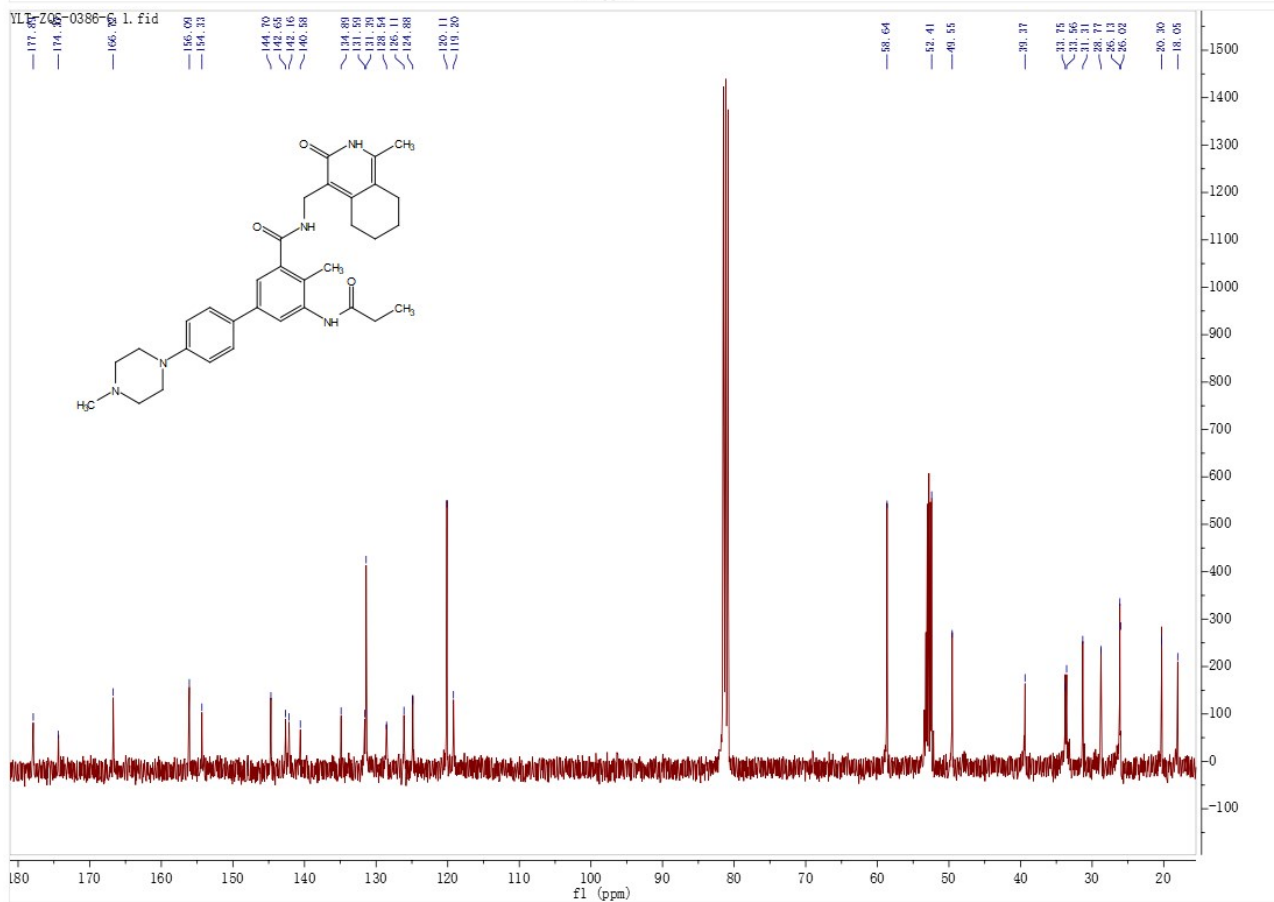

10:03:13

200425\_0386 22 (0.376) Cm (4:24)

25-Apr-2020

TOF MS ES+  
2.12e4

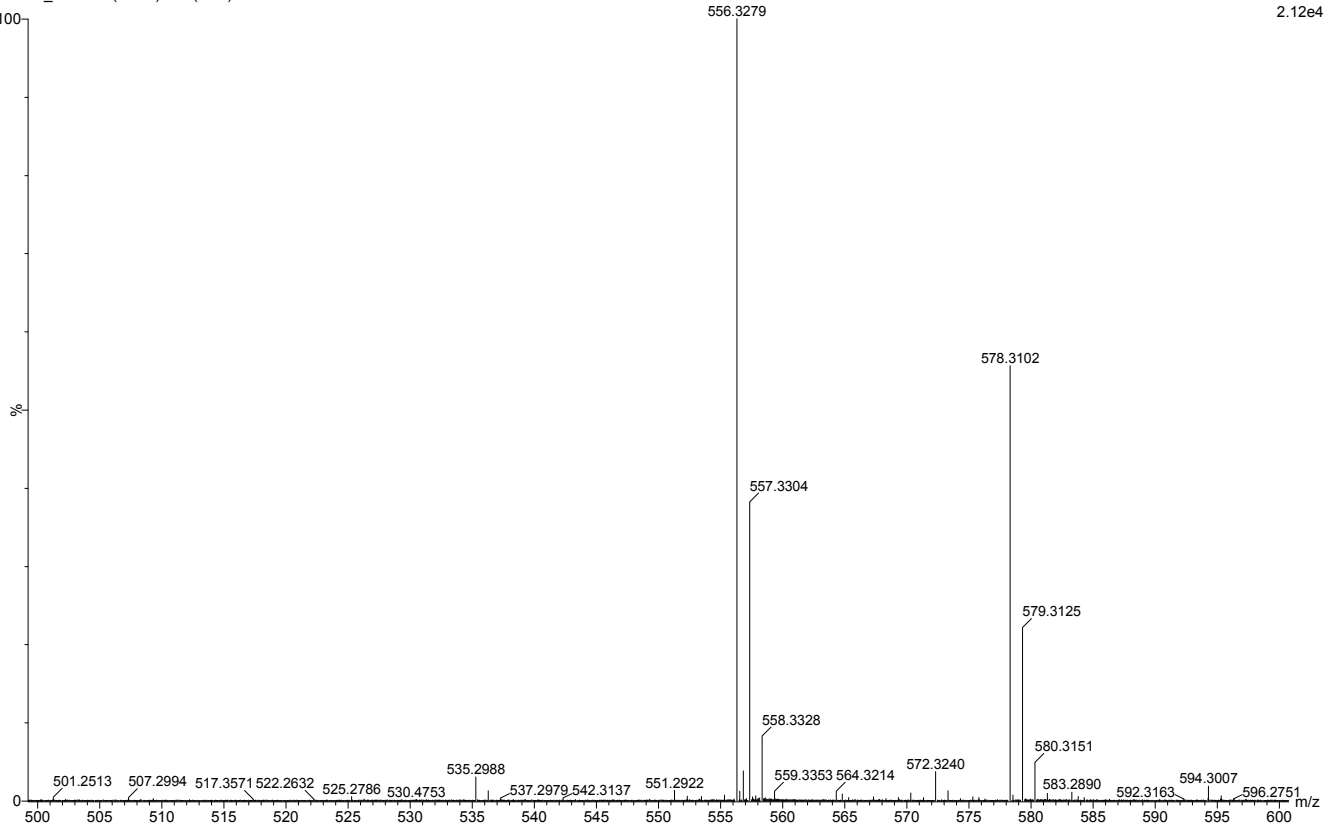

Supplement: d0cc04670a1.pdf [file d0cc04670a1.pdf]
